# Supplementary material for: A systematic review and meta-analysis of interventions to decrease cyberbullying perpetration and victimization: An in-depth analysis within the Asia Pacific region
Source: Front Psychiatry. 2023 Jan 27;14:1014258. doi: 10.3389/fpsyt.2023.1014258 (PMC9911532; doi:10.3389/fpsyt.2023.1014258)
Supplement: Supplementary file 6 [file Table_1.xlsx]

## Sheet: abstract
#	id	title	year	journal	authors	full text
1	786020195	A pilot intervention study on bullying prevention among junior high school students in Shantou, China	2022	BMC Public Health	Peng, Zhekuan and Li, Liping and Su, Xuefen and Lu, Yaogui	retrieved
2	786020196	Risk and Protective Factors in Adolescent Suicidal Behaviour: A Network Analysis	2022	International Journal of Environmental Research and Public Health	Fonseca-Pedrero, Eduardo and Al-HalabÃ­, Susana and PÃ©rez-AlbÃ©niz, Alicia and DebbanÃ©, Martin	drop
3	786020197	Network Anonymity and Cyberbullying among Chinese Adolescents: A Moderated Mediation Model	2022	International Journal of Environmental Research and Public Health	Zhao, Lingbo and Wu, Yingru and Huang, Xiayu and Zhang, Lin	drop
4	786020198	An App-Based Intervention for Adolescents Exposed to Cyberbullying in Norway: Protocol for a Randomized Controlled Trial	2021	JMIR Research Protocols	Kaiser, Sabine and Martinussen, Monica and Adolfsen, Frode and Breivik, Kyrre and Kyrrestad, Henriette	drop
5	786020199	Peer victimization, learning flow, and academic achievement: Longitudinal relations among Chinese elementary school students	2021	School Psychology	Liu, Minjia and Huebner, E. Scott and Tian, Lili	drop
6	786020200	Current limitations in cyberbullying detection: On evaluation criteria, reproducibility, and data scarcity	2021	Language Resources and Evaluation	Emmery Chris and Verhoeven, Ben and De Pauw Guy and Jacobs, Gilles and Cynthia, Van Hee and Lefever Els and Desmet, Bart and Hoste VÃ©ronique and Daelemans Walter	drop
7	786020201	Moderating effects of delinquent peer association, social control, and negative emotion on cyberbullying and delinquency: Gender differences	2021	School Psychology	Guo, Siying	drop
8	786020202	Cyberbullying and cyber-mobbing in developing countries	2021	Information and Computer Security	Kintonova, Aliya and Vasyaev, Alexander and Shestak, Viktor	drop
9	786020203	Bullying in children: impact on child health	2021	BMJ Paediatrics Open	Armitage, Richard	drop
10	786020204	Bullying Victimization and Developmental Trajectories of Internalizing and Externalizing Problems: The Moderating Role of Locus of Control Among Children	2021	Journal of Abnormal Child Psychology	Gong Xue and Scott, Huebner E and Tian Lili	drop
11	786020205	Sociocultural values, attitudes and risk factors associated with adolescent cyberbullying in East Asia: A systematic review	2021	Cyberpsychology	Park, Miriam Sang-Ah and Golden, Karen Jennifer and Vizcaino-Vickers, Samuel and Dung Jidong and Raj, Sanjana	drop
12	786020206	Pathways from Childhood Bullying Victimization to Young Adult Depressive and Anxiety Symptoms	2021	Child Psychiatry and Human Development	Lee, Jungup	drop
13	786020207	Cyberbullying and Bullying: Impact on Psychological Symptoms and Well-Being	2021	Child Indicators Research	Carvalho, Marina and Branquinho CÃ¡tia and de Matos Margarida Gaspar	drop
14	786020208	Perceived Challenges and Online Harms from Social Media Use on a Severity Continuum: A Qualitative Psychological Stakeholder Perspective	2021	International Journal of Environmental Research and Public Health	Throuvala, Melina A and Griffiths, Mark D and Rennoldson, Mike and Kuss, Daria J	drop
15	786020209	Impact of Multifaceted Workplace Bullying on the Relationships between Technology Usage, Organisational Climate and Employee Physical and Emotional Health	2021	International Journal of Environmental Research and Public Health	Mehwish Iftikhar and Qureshi, Muhammad Imran and Qayyum, Shazia and Fatima, Iram and Sriyanto, Sriyanto and Indrianti, Yasinta and Khan, Aqeel and Leo-Paul, Dana	drop
16	786020210	Exploring Risk and Protective Factors for Cyberbullying and Their Interplay: Evidence from a Sample of South Korean College Students	2021	International Journal of Environmental Research and Public Health	Seong-Sik, Lee and Song, Hyojong and Park, Jeong Hyun	drop
17	786020211	Examining the Influence of Cyberbullying Perpetration and Victimization among High School Adolescentsâ€”Associations with Gender and Grade Level	2021	Educational Process: International Journal	Yirci, Ramazan and Karakose, Turgut and Malkoc, Nedim	drop
18	786020212	The Impact of Socialisation on Childrenâ€™s Prosocial Behaviour. A Study on Primary School Students	2021	International Journal of Environmental Research and Public Health	Tintori, Antonio and Ciancimino, Giulia and Palomba, Rossella and Clementi, Cristiana and Cerbara, Loredana	drop
19	786020213	Detecting Aggressiveness in Tweets: A Hybrid Model for Detecting Cyberbullying in the Spanish Language	2021	Applied Sciences	Lepe-FaÃºndez, Manuel and Segura-Navarrete, Alejandra and Vidal-Castro, Christian and MartÃ­nez-Araneda, Claudia and Rubio-Manzano, Clemente	drop
20	786020214	Can Online Education Programs Solve the Cyberbullying Problem? Educating South Korean Elementary Students in the COVID-19 Era	2021	Sustainability	Choi, Eunsun and Park, Namje	retrieved
21	786020215	Relationship between Cyberbullying, Motivation and Learning Strategies, Academic Performance, and the Ability to Adapt to University	2021	International Journal of Environmental Research and Public Health	Aparisi, David and Delgado, Beatriz and Bo, Rosa M and MartÃ­nez-Monteagudo, MarÃ­a Carmen	drop
22	786020216	Offline Victimization, Psychological Morbidity, and Problematic Online Behavior among Chinese Secondary School Students	2021	International Journal of Environmental Research and Public Health	Shek, Daniel T L and Shek, Esther Y W	drop
23	786020217	Self-Reported Depressive Symptoms and Suicidality in Adolescents with Attention-Deficit/Hyperactivity Disorder: Roles of Bullying Involvement, Frustration Intolerance, and Hostility	2021	International Journal of Environmental Research and Public Health	Tai-Ling, Liu and Hsiao, Ray C and Chou, Wen-Jiun and Cheng-Fang, Yen	drop
24	786020218	Perpetration of and Victimization in Cyberbullying and Traditional Bullying in Adolescents with Attention-Deficit/Hyperactivity Disorder: Roles of Impulsivity, Frustration Intolerance, and Hostility	2021	International Journal of Environmental Research and Public Health	Tai-Ling, Liu and Hsiao, Ray C and Chou, Wen-Jiun and Cheng-Fang, Yen	drop
25	786020219	Bullying and Its Associated Individual, Peer, Family and School Factors: Evidence from Malaysian National Secondary School Students	2021	International Journal of Environmental Research and Public Health	Sabramani, Vikneswaran and Idris, Idayu Badilla and Ismail, Halim and Nadarajaw, Thiyagar and Ezarina Zakaria and Mohammad Rahim Kamaluddin	drop
26	786020220	Mindfulness Promotes Online Prosocial Behavior via Cognitive Empathy	2021	International Journal of Environmental Research and Public Health	Lv, Yiqing and Qiao, Xiuqing and Leng, Jie and Zheng, Yuanhua and Guo, Qingke	drop
27	786020221	Detection of Harassment Type of Cyberbullying: A Dictionary of Approach Words and Its Impact	2021	Security and Communication Networks	Syed Mahbub and Pardede, Eric and Kayes, A S M and Shehzad Ashraf Chaudhry	drop
28	786020222	Social Anxiety in Victimization and Perpetration of Cyberbullying and Traditional Bullying in Adolescents with Autism Spectrum Disorder and Attention-Deficit/Hyperactivity Disorder	2021	International Journal of Environmental Research and Public Health	Tai-Ling, Liu and Hsiao, Ray C and Chou, Wen-Jiun and Cheng-Fang, Yen	drop
29	786020223	Social Media Toxicity Classification Using Deep Learning: Real-World Application UK Brexit	2021	Electronics	Fan, Hong and Wu, Du and Dahou, Abdelghani and Ewees, Ahmed A and Yousri, Dalia and Mohamed Abd Elaziz and Elsheikh, Ammar H and Abualigah, Laith and Al-qaness, Mohammed A A	drop
30	786020224	Cyberbullying and Well-being Among University Students: The Role of Resilience	2021	International Journal of Caring Sciences	Collen, Hatem Ocel and Onan, Nevin	drop
31	786020225	Online disinhibition: conceptualization, measurement, and implications for online deviant behavior	2021	Industrial Management & Data Systems	Cheung, Christy MK and Wong, Randy Yee Man and Tommy KH Chan	drop
32	786020226	The prevalence, risks and associations of problematic cell phone use and sexting on mental health	2021	Mental Health and Social Inclusion	Scott, David A and McCormick, Katlyn and Smith, Kirby and Budlong, Emily and Vitonis, Alexandra	drop
33	786020227	Cyberbullying Detection in Social Networks Using Bi-GRU with Self-Attention Mechanism	2021	Information	Fang, Yong and Yang, Shaoshuai and Zhao, Bin and Huang, Cheng	drop
34	786020228	Cyberbullying in Social Media and Online Games among Chinese College Students and Its Associated Factors	2021	International Journal of Environmental Research and Public Health	Huang, Jinyu and Zhong, Zhaohao and Zhang, Haoyuan and Li, Liping	drop
35	786020229	Parental Behavioral Control and Bullying and Victimization of Rural Adolescents in China: The Roles of Deviant Peer Affiliation and Gender	2021	International Journal of Environmental Research and Public Health	Chen, Xu and Li, Ling and Lv, Gangwu and Li, Hui	drop
36	786020230	Consequences of Cyberbullying and Social Overload while Using SNSs: A Study of Usersâ€™ Discontinuous Usage Behavior in SNSs	2020	Information Systems Frontiers	Cao Xiongfei and Khan, Ali Nawaz and Ahsan, Ali and Khan, Naseer Abbas	drop
37	786020231	Prevalence and psychosocial predictors of cyberaggression and cybervictimization in adolescents: A Spain-Ecuador transcultural study on cyberbullying	2020	PLoS One	RodrÃ­guez-Hidalgo, Antonio J and Mero, Oswaldo and Solera, Eva and Herrera-LÃ³pez, Mauricio and Calmaestra, Juan	drop
38	786020232	Tackling Cyberbullying and Related Problems:Â Innovative Usage of Games, Apps and Manga	2020		Toda, Yuichi and Oh, Insoo	drop
39	786020233	Prevalence and associated factors of suicidality in Japanese adolescents: results from a population-based questionnaire survey	2020	BMC Pediatrics	Nagamitsu, Shinichiro and Mimaki, Masakazu and Koyanagi, Kenshi and Tokita, Natsuko and Kobayashi, Yoriko and Hattori, Ritsuko and Ishii, Ryuta and Matsuoka, Michiko and Yamashita, Yushiro and Yamagata, Zentaro and Igarashi, Takashi and Croarkin, Paul E	drop
40	786020234	Credible Threat: Attacks Against Women Online and the Future of Democracy	2020	Oxford Studies Digital Politics Ser.	Sobieraj, Sarah	drop
41	786020235	The link between childhood psychological maltreatment and cyberbullying perpetration attitudes among undergraduates: Testing the risk and protective factors	2020	PLoS One	Sun, Xiaohua and Chen, Liang and Wang, Yandong and Li, Yan	drop
42	786020236	Parental Support, Health, and Cyberbullying among Adolescents with Intellectual and Developmental Disabilities	2020	Journal of Child and Family Studies	Wright, Michelle F and Wachs, Sebastian	drop
43	786020237	Emotional warmth and cyberbullying perpetration attitudes in college students: Mediation of trait gratitude and empathy	2020	PLoS One	Chen, Liang and Wang, Yandong and Yang, Hongze and Sun, Xiaohua	drop
44	786020238	Sleep Quality as a Mediator of the Relationship Between Cyber Victimization and Depression	2020	Journal of Nursing Scholarship	Kwon, Misol, BS, RN and Seo, Young S, PhD and Nickerson, Amanda B, PhD, NCSP and Dickerson, Suzanne S, DNS, RN and Park, Eunhee, PhD, RN and Livingston, Jennifer A, PhD	drop
45	786020239	Differential longitudinal outcomes of in-person and cyber victimization in early adolescence	2020	Psychology of Violence	Mehari, Krista R. and Thompson, Erin L. and Farrell, Albert D.	drop
46	786020240	Cyberbullying victimization and student engagement among adolescents: Does school climate matter?	2020	School Psychology	Yang, Chunyan and Sharkey, Jill D. and Reed, Lauren A. and Dowdy, Erin	drop
47	786020241	Investigating the mechanisms of theory of planned behavior on Cyberbullying among Thai adolescents	2020	Journal of Health Research	Auemaneekul, Naruemon and Powwattana, Arpaporn and Kiatsiri, Emwadee and Thananowan, Nanthana	drop
48	786020242	Link Between Cyberbullying Victimization and Perpetration Among Undergraduates: Mediating Effects of Trait Anger and Moral Disengagement	2020	Psychology Research and Behavior Management	Dou, Guangbo and Xiang, Ying and Sun, Xiaohua and Chen, Liang	drop
49	786020243	Science Mapping for Popular Topics in Cyberbullying Prevention Articles	2020	Library Philosophy and Practice	Kurniasih, Nuning and Kuswarno, Engkus and Yanto, Andri and Suganda, Tarkus	drop
50	786020244	ONLINE AT RISK! ONLINE ACTIVITIES OF CHILDREN IN DORMITORIES: EXPERIENCES IN A CROATIAN COUNTY	2020	International Journal of Child, Youth & Family Studies	Vejmelka, Lucija and Matkovic, Roberta and Davorka Kovacic Borkovic	drop
51	786020245	Bullying victimization among Lebanese adolescents: The role of child abuse, Internet addiction, social phobia and depression and validation of the Illinois Bully Scale	2020	BMC Pediatrics	Malaeb, Diana and Awad, Emmanuelle and Haddad, Chadia and Salameh, Pascale and Sacre, Hala and Akel, Marwan and Soufia, Michel and Hallit, Rabih and Obeid, Sahar and Hallit, Souheil	drop
52	786020246	Moral identity: A mediation model of moral disengagement and altruistic attitude	2020	Social Behavior and Personality	Yang, Liheng and Cai, Guoying and Yong, Shaohong and Shi, Haohao	drop
53	786020247	Bullying victimization, physical inactivity and sedentary behavior among children and adolescents: a meta-analysis	2020	International Journal of Behavioral Nutrition and Physical Activity	GarcÃ­a-Hermoso, Antonio and Hormazabal-Aguayo, Ignacio and Oriol-Granado, Xavier and FernÃ¡ndez-Vergara, Omar and Borja del Pozo Cruz	drop
54	786020248	Does sexual orientation of bullying target influence bystander response?	2020	Irish Journal of Management	Meglich, Patricia and Porter, Tracy and Day, Nancy	drop
55	786020249	Entropy-Based Face Recognition and Spoof Detection for Security Applications	2020	Sustainability	Pujol, Francisco A and Pujol, MarÃ­a JosÃ© and Rizo-Maestre, Carlos and Pujol, Mar	drop
56	786020250	Childhood trauma and suicidal ideation among Chinese university students: the mediating effect of Internet addiction and school bullying victimisation	2020	Epidemiology and Psychiatric Sciences	Lu, Li and ShengYan Jian and Dong, Min and Gao, Jie and Zhang, TianTian and Chen, XueQin and Zhang, YuFang and Shen, HongYi and Chen, HongRu and Gai, XiangYun and Liu, Shou	drop
57	786020251	The P.E.A.C.E. Pack Program in Italian High Schools: An Intervention for Victims of Bullying	2020	International Journal of Environmental Research and Public Health	Guarini, Annalisa and MenabÃ², Laura and Menin, Damiano and Mameli, Consuelo and Skrzypiec, Grace and Slee, Phillip and Brighi, Antonella	drop
58	786020252	Cyberbullying Victimization and Adolescent Depression: The Mediating Role of Psychological Security and the Moderating Role of Growth Mindset	2020	International Journal of Environmental Research and Public Health	Niu, Gengfeng and He, Jing and Lin, Shanyan and Sun, Xiaojun and Longobardi, Claudio	drop
59	786020253	Cyberharassment Awareness Course (Cybac): Influences from Domestic Abuse Perpetrator Programmes for its Design and Function	2020	International Journal of Cyber Criminology	Conradie, Lies and Pitchford, Melanie and Barnes, James and Short, Emma	drop
60	786020254	Relationships among cyberbullying, parental attitudes, self-harm and suicidal behavior among adolescents: results from a school-based survey in Vietnam	2020	BMC Public Health	Hoang Thuy Linh Nguyen and Nakamura, Keiko and Seino, Kaoruko and Vo, Van Thang	drop
61	786020255	Improving Childrenâ€™s E-Safety Skills through an Interactive Learning Environment: A Quasi-Experimental Study	2020	Multimodal Technologies and Interaction	Nicolaidou, Iolie and Venizelou, Agnes	retrieved
62	786020256	Assessing risk factors and impact of cyberbullying victimization among university students in Myanmar: A cross-sectional study	2020	PLoS One	Khine, Aye Thazin and Yu Mon Saw and Zaw Ye Htut and Cho Thet Khaing and Htin Zaw Soe and Swe, Kyu Kyu and Thike, Thinzar and Hein Htet and Saw, Thu Nandar and Cho, Su Myat and Kariya, Tetsuyoshi and Yamamoto, Eiko and Hamajima, Nobuyuki	drop
63	786020257	Raising awareness on cyber safety: adolescentsâ€™ experience of a primary healthcare professional-led, school-based, multi-center intervention	2019	International Journal of Adolescent Medicine and Health	Tsimtsiou, Zoi and Drosos, Evangelos and Drontsos, Anastasios and Anna-Bettina Haidich and Dantsi, Fotini and Sekeri, Zafiria and Dardavesis, Theodoros and Nanos, Panagiotis and Arvanitidou, Malamatenia	retrieved
64	786020258	Effects of an incremental theory of personality intervention on the reciprocity between bullying and cyberbullying victimization and perpetration in adolescents	2019	PLoS One	Calvete, Esther and Orue, Izaskun and FernÃ¡ndez-GonzÃ¡lez, Liria and Prieto-Fidalgo, Angel	retrieved
65	786020259	Rumination Mediates and Moderates the Relationship between Bullying Victimization and Depressive Symptoms in Chinese Early Adolescents	2019	Child Indicators Research	Xiao-Wei, Chu and Cui-Ying, Fan and Qing-Qi, Liu and Zhou, Zong-Kui	drop
66	786020260	Bullying among Teens: Are Ethnicity and Race Risk Factors for Victimization? A Bibliometric Research	2019	Education Sciences	Arturo Fuentes Cabrera and Moreno Guerrero, Antonio JosÃ© and JosÃ© Santiago Pozo SÃ¡nchez and RodrÃ­guez-GarcÃ­a, Antonio-Manuel	drop
67	786020261	Defending behavior of peer victimization in school and cyber context during childhood and adolescence: A meta-analytic review of individual and peer-relational characteristics	2019	Psychological Bulletin	Ma, Ting-Lan and Meter, Diana J. and Chen, Wei-Ting and Lee, Yen	drop
68	786020262	Cyberbullying and the Critical Importance of Educational Resources for Prevention and Intervention	2019		Marzano, Gilberto and Lizut, Joanna	drop
69	786020263	Cyberbullying in Schools, Workplaces, and Romantic Relationships:Â The Many Lenses and Perspectives of Electronic Mistreatment	2019		Giumetti, Gary W. and Kowalski, Robin M.	drop
70	786020264	Cyberbullying identification on twitter using random forest classifier	2019	Journal of Physics: Conference Series	Novalita, N and Herdiani, A and Lukmana, I and Puspandari, D	drop
71	786020265	Narratives in Research and Interventions on Cyberbullying among Young People	2019		Vandebosch, Heidi and Green, Lelia	drop
72	786020266	Pilot Testing the Feasibility of a Game Intervention Aimed at Improving Help Seeking and Coping Among Sexual and Gender Minority Youth: Protocol for a Randomized Controlled Trial	2019	JMIR Research Protocols	Coulter, Robert W S and Sang, Jordan M and Louth-Marquez, William and Henderson, Emmett R and Espelage, Dorothy and Hunter, Simon C and DeLucas, Matthew and Abebe, Kaleab Z and Miller, Elizabeth and Morrill, Brooke A and Hieftje, Kimberly and Friedman, Mark S and Egan, James E	drop
73	786020267	Parenting Strategies and Adolescentsâ€™ Cyberbullying Behaviors: Evidence from a Preregistered Study of Parentâ€“Child Dyads	2019	Journal of Youth and Adolescence	Legate, Nicole and Weinstein, Netta and Przybylski, Andrew K	drop
74	786020268	Negative Facebook experiences among Taiwanese gay and bisexual men in emerging adulthood: associations with traditional harassment victimization and quality of life	2019	Neuropsychiatric Disease and Treatment	Wei-Hsin, Lu and Yu-Ping, Chang and Chien-Ho, Lin and Cheng-Fang, Yen	drop
75	786020269	Overlap of traditional bullying and cyberbullying and correlates of bullying among Taiwanese adolescents: a cross-sectional study	2019	BMC Public Health	Chia-Wen, Wang and Patou Masika Musumari and Techasrivichien, Teeranee and Suguimoto, S Pilar and Tateyama, Yukiko and Chang-Chuan, Chan and Ono-Kihara, Masako and Kihara, Masahiro and Nakayama, Takeo	drop
76	786020270	Coping with Cybervictimization: The Role of Direct Confrontation and Resilience on Adolescent Wellbeing	2019	International Journal of Environmental Research and Public Health	Brighi, Antonella and Mameli, Consuelo and Menin, Damiano and Guarini, Annalisa and Carpani, Francesca and Slee, Phillip T	drop
77	786020271	Profiles of Problematic Internet Use and Its Impact on Adolescentsâ€™ Health-Related Quality of Life	2019	International Journal of Environmental Research and Public Health	Machimbarrena, Juan M and GonzÃ¡lez-Cabrera, JoaquÃ­n and Ortega-BarÃ³n, JÃ©ssica and Beranuy-Fargues, Marta and Ãlvarez-BardÃ³n, Aitor and Tejero, Blanca	drop
78	786020272	Child Victimization in the Context of Family Violence	2019	International Journal of Environmental Research and Public Health	Chan, Ko Ling	drop
79	786020273	Challenges and Opportunities of Anti-Bullying Intervention Programs	2019	International Journal of Environmental Research and Public Health	Smith, Peter K and Bauman, Sheri and Wong, Dennis	drop
80	786020274	Cyberbullying across the Lifespan of Education: Issues and Interventions from School to University	2019	International Journal of Environmental Research and Public Health	Myers, Carrie-Anne and Cowie, Helen	drop
81	786020275	RPC Teacher-Based Program for Improving Coping Strategies to Deal with Cyberbullying	2019	International Journal of Environmental Research and Public Health	Guarini, Annalisa and Menin, Damiano and MenabÃ², Laura and Brighi, Antonella	drop
82	786020276	Parental Communication and Feelings of Affiliation in Adolescent Aggressors and Victims of Cyberbullying	2019	Social Sciences	Jessica Ortega BarÃ³n and Postigo, Javier and Iranzo, BegoÃ±a and Buelga, SofÃ­a and Carrascosa, Laura	drop
83	786020277	Doxing Victimization and Emotional Problems among Secondary School Students in Hong Kong	2018	International Journal of Environmental Research and Public Health	Chen, Qiqi and Chan, Ko Ling and Anne Shann Yue Cheung	drop
84	786020278	Parenting Practices as Risk or Preventive Factors for Adolescent Involvement in Cyberbullying: Contribution of Children and Parent Gender	2018	International Journal of Environmental Research and Public Health	GÃ³mez-Ortiz, Olga and Romera, Eva M and Ortega-Ruiz, Rosario and Rosario Del Rey	drop
85	786020279	Does Parental Mediation Moderate the Longitudinal Association among Bystanders and Perpetrators and Victims of Cyberbullying?	2018	Social Sciences	Wright, Michelle F and Wachs, Sebastian	drop
86	786020281	Automatic detection of cyberbullying in social media text	2018	PLoS One	Cynthia Van Hee and â¨¯ Gilles Jacobs and Emmery, Chris and Desmet, Bart and Lefever, Els and Verhoeven, Ben and De Pauw, Guy and Daelemans, Walter and Hoste, VÃ©ronique	drop
87	786020282	New technologies and 21st century children: RECENT TRENDS AND OUTCOMES	2018	OECD Education Working Papers	Graafland, Julie Hooft	drop
88	786020283	Online Harassment	2018	Human-Computer Interaction Ser.	Golbeck, Jennifer	drop
89	786020284	Child online safety and parental intervention: a study of Sri Lankan internet users	2018	Information Technology & People	Tennakoon, Hemamali and Saridakis, George and Mohammed, Anne-Marie	drop
90	786020285	International Perspectives on Cyberbullying:Â Prevalence, Risk Factors and Interventions	2018	Palgrave Studies in Cybercrime and Cybersecurity Ser.	Baldry, Anna Costanza and Blaya, Catherine and Farrington, David P.	drop
91	786020286	Intervention in social skills and bullying	2018	Revista Brasileira de Enfermagem	da Silva, Jorge Luiz and de Oliveira, Wanderlei Abadio and Carlos, Diene Monique and Lizzi, Elisangela Aparecida da Silva and RosÃ¡rio, Rafaela and Silva, Marta AngÃ©lica Iossi	retrieved
92	786020287	Cyber Harassment and Policy Reform in the Digital Age: Emerging Research and Opportunities	2018		McNeal, Ramona S and Kunkle, Susan M and Schmeida, Mary	drop
93	786020288	Cyberbullying Victimization and Adolescent Mental Health: Evidence of Differential Effects by Sex and Mental Health Problem Type	2018	Journal of Youth and Adolescence	Kim, Soyeon and Colwell, Scott R and Kata, Anna and Boyle, Michael H and Georgiades, Katholiki	drop
94	786020289	Considering mindfulness techniques in school-based anti-bullying programmes	2018	Journal of New Approaches in Educational Research	Foody, MairÃ©ad and Samara, Muthanna	drop
95	786020290	Book Review of Cyber Bullying Approaches, Consequences and Interventions	2018	International Journal of Cyber Criminology	Sung, Yu-Hsien	drop
96	786020291	ICT Challenges and Opportunities in Building a "Bright Society"	2018	Journal of the Association for Information Systems	Oh, Wonseok and Acquisti, Alessandro and Sia, Choon Ling	drop
97	786020292	Cyberbullying Victimization through Social Networking Sites and Adjustment Difficulties: The Role of Parental Mediation	2018	Journal of the Association for Information Systems	Wright, Michelle	drop
98	786020293	A Mixed Methods Evaluation of the "Aged-Up" STAC Bullying Bystander Intervention for High School Students	2018	The Professional Counselor	Johnston, April D and Midgett, Aida and Doumas, Diana M and Moody, Steve	retrieved
99	786020294	Is there a gender difference in cyber-victimization? A meta-analysis	2018	Journal of Media Psychology: Theories, Methods, and Applications	Sun, Shaojing and Fan, Xitao	drop
100	786020295	Bullying and Cyberbullying: Their Legal Status and Use in Psychological Assessment	2017	International Journal of Environmental Research and Public Health	Samara, Muthanna and Burbidge, Vicky and Aiman El Asam and Foody, Mairead and Smith, Peter K and Morsi, Hisham	drop
101	786020296	Do Emotional Components of Alexithymia Mediate the Interplay between Cyberbullying Victimization and Perpetration?	2017	International Journal of Environmental Research and Public Health	Wachs, Sebastian and Bilz, Ludwig and Fischer, Saskia M and Wright, Michelle F	drop
102	786020297	Cyberbullying on Online Gaming Platforms for Children and Youth: C & A	2017	Child & Adolescent Social Work Journal	McInroy, Lauren B and Mishna, Faye	drop
103	786020298	Shame Nation:Â The Global Epidemic of Online Hate	2017		Scheff, Sue and Schorr, Melissa	drop
104	786020299	iZ HERO adventure: Evaluating the effectiveness of a peer-mentoring and transmedia cyberwellness program for children	2017	Psychology of popular media culture.	Liau, Albert Kienfie and Park, Yuhyun and Gentile, Douglas A. and Katna, Dashalini P. and Tan, Celestine Hana A. and Khoo, Angeline	retrieved
105	786020300	Coping with Cyberbullying	2017	Coping Ser.	Mapua, Jeff	drop
106	786020301	Bernadette H. Schell: Online Health and Safety: From Cyberbullying to Internet Addiction	2017	Journal of Youth and Adolescence	Falender, Jessica	drop
107	786020302	Bullying and Cyberbullying: Prevalence, Psychological Impacts and Intervention Strategies	2016	Bullying and Victimization	Guckin, Conor Mc and Corcoran, Lucie	drop
108	786020303	Statistical Analysis of Automatic Seed Word Acquisition to Improve Harmful Expression Extraction in Cyberbullying Detection	2016	International Journal of Engineering and Technology Innovation	Hatakeyama, Suzuha and Masui, Fumito and Ptaszynski, Michal and Yamamoto, Kazuhide	drop
109	786020304	Longitudinal impact of the Cyber Friendly Schools program on adolescents' cyberbullying behavior	2016	Aggressive Behavior	Cross, Donna and Shaw, ThÃ©rÃ¨se and Hadwen, Kate and Cardoso, Patricia and Slee, Phillip and Roberts, Clare and Thomas, Laura and Barnes, Amy	retrieved
110	786020305	Dying online: live broadcasts of Chinese emerging adult suicides and crisis response behaviors	2016	BMC Public Health	Ma, Jing and Zhang, Wei and Harris, Keith and Chen, Qiang and Xu, Xiaolin	drop
111	786020306	Sexing the avatar: Gender, sexualization, and cyber-harassment in a virtual world	2016	Journal of Media Psychology: Theories, Methods, and Applications	Behm-Morawitz, Elizabeth and Schipper, Shannon	drop
112	786020307	The Structure of Co-Occurring Bullying Experiences and Associations with Suicidal Behaviors in Korean Adolescents	2015	PLoS One	Beop-Rae Roh and Yoon, Yoewon and Kwon, Ahye and Oh, Seunga and Lee, Soyoung Irene and Ha, Kyunghee and Shin, Yun Mi and Song, Jungeun and Eun Jin Park and Yoo, Heejung and Hong, Hyun Ju	drop
113	786020308	Cyberbullying aggressors among Spanish secondary education students: an exploratory study	2015	Interactive Technology and Smart Education	Buelga, SofÃ­a and Cava, Maria J and Musitu, Gonzalo and Torralba, Eva	drop
114	786020309	The Life Experiences of Children in Middle Childhood Who Continue to Be Bullied	2015		Macdonald, Helen Margaret	drop
115	786020310	Bullying Beyond the Schoolyard:Â Preventing and Responding to Cyberbullying	2014		Hinduja, Sameer K and Patchin, Justin W	drop
116	786020311	Current perspectives: the impact of cyberbullying on adolescent health	2014	Adolescent Health, Medicine and Therapeutics	Nixon, Charisse L	drop
117	786020312	Handbook on Bullying:Â Prevalence, Psychological Impacts and Intervention Strategies	2014	Social Issues, Justice and Status	Triggs, Phoebe	drop
118	786020313	From Cyber Bullying to Cyber Safety:Â Issues and Approaches in Educational Contexts	2013	Internet Policies and Issues	Hanewald, Ria	drop
119	786020314	What a rude e-mail! Examining the differential effects of incivility versus support on mood, energy, engagement, and performance in an online context	2013	Journal of Occupational Health Psychology	Giumetti, Gary W. and Hatfield, Andrea L. and Scisco, Jenna L. and Schroeder, Amber N. and Muth, Eric R. and Kowalski, Robin M.	drop
120	786020315	Cyber-Bullying Among University Students: An Empirical Investigation from the Social Cognitive Perspective	2013	International Journal of Business and Information	Xiao, Bo Sophia and Wong, Yee Man	drop
121	786020316	The Association Between Cyber Victimization and Subsequent Cyber Aggression: The Moderating Effect of Peer Rejection	2013	Journal of Youth and Adolescence	Wright, Michelle F and Li, Yan	drop
122	786020317	Cyber Bullying Prevention: Intervention in Taiwan	2013	PLoS One	Ming-Shinn, Lee and Zi-Pei, Wu and SvanstrÃ¶m, Leif and Dalal, Koustuv	retrieved
123	786020318	Toward a Conceptual Model of Motive and Self-Control in Cyber-Aggression: Rage, Revenge, Reward, and Recreation	2013	Journal of Youth and Adolescence	Runions, Kevin C	drop
124	786020319	Cyberbullying and E-Safety:Â What Educators and Other Professionals Need to Know	2012		Katz, Adrienne	drop
125	786020320	Social Media and Suicide: A Public Health Perspective	2012	American Journal of Public Health	Luxton, David D, PhD and June, Jennifer D, BA and Fairall, Jonathan M, BS	drop
126	786020321	Cyberbullying	2012	Issues That Concern You Ser.	Roleff, Tamara L.	drop
127	786020322	Cyberbullying in the Global Playground:Â Research from International Perspectives	2012		Li, Qing and Cross, Donna and Smith, Peter K.	drop
128	786020323	Cyber Bullying No More:Â Parenting a High Tech Generation	2011		Kenley, Holli and Zelinger, Laurie	drop
129	786020324	Cyber bullying behaviors among middle and high school students	2010	American Journal of Orthopsychiatry	Mishna, Faye and Cook, Charlene and Gadalla, Tahany and Daciuk, Joanne and Solomon, Steven	drop
130	786020325	Cyber Kids, Cyber Bullying, Cyber Balance	2009		Dr. Trolley, Barbara C. and Dr. Hanel, Constance	drop
131	786020326	Cyber Bullying:Â Bullying in the Digital Age	2008		Kowalski, Robin M and Limber, Susan P and Agatston, Patricia W	drop
132	786020327	â€œThinking before posting?â€ Reducing cyber harassment on social networking sites through a reflective message.	2017	Computers in Human Behavior	Van Royen, Kathleen and Poels, Karolien and Vandebosch, Heidi and Adam, Philippe	retrieved
133	786020328	Academic, Socio-emotional and Demographic Characteristics of Adolescents Involved in Traditional Bullying, Cyberbullying, or Both: Looking at Variables and Persons.	2017	International Journal of Developmental Science	Solomontos-Kountouri, Olga and Tsagkaridis, Konstantinos and Gradinger, Petra and Strohmeier, Dagmar	drop
134	786020329	Beyond the Schoolyard: A Multilevel Examination of Individual, School and School District Variables Associated with Traditional and Cyber Peer Aggression.	2020	Child & Youth Care Forum	Dhungana Sainju, Karla	drop
135	786020330	Bullying Across Late Childhood and Early Adolescence: A Prospective Cohort of Students Assessed Annually From Grades 3 to 8.	2021	Academic pediatrics	Fujikawa, Shinya and Mundy, Lisa K and Canterford, Louise and Moreno-Betancur, Margarita and Patton, George C	drop
136	786020331	Bullying Victimization and Problem Video Gaming: The Mediating Role of Externalizing and Internalizing Problems.	2021	International journal of environmental research and public health	Richard, JÃ©rÃ©mie and Marchica, Loredana and Ivoska, William and Derevensky, Jeffrey	drop
137	786020332	Bullying, Cyberbullying, and Suicide.	2010	Archives of Suicide Research	Hinduja, Sameer and Patchin, JustinW.	drop
138	786020333	Bullying: Definition, Types, Causes, Consequences and Intervention.	2016	Social & Personality Psychology Compass	Smith, Peter K	drop
139	786020334	Challenges in the Evaluation of Cyberbullying Prevention - Insights from Two Case Studies.	2017	International Journal of Developmental Science	Pieschl, Stephanie and Kourteva, Penka and Stauf, Leonie	drop
140	786020335	Childhood Emotional Abuse and Cyberbullying Perpetration Among Adolescents: The Mediating Role of Trait Mindfulness.	2020	International Journal of Mental Health & Addiction	Emirtekin, Emrah and Balta, Sabah and Kircaburun, Kagan and Griffiths, Mark D.	drop
141	786020336	Cognitive Coping and Psychological Problems among Bullied and Non-bullied Adolescents.	2016	Journal of Psychosocial Research	Maji, Somdeb and Bhattacharya, Saswati and Ghosh, Debasruti	drop
142	786020337	Commentary: Types of bullying, types of intervention: reflections on Arseneault (2018).	2018	Journal of Child Psychology & Psychiatry	Smith, Peter K.	drop
143	786020338	Comments on cyberbullying article: A rejoinder.	2012	European Journal of Developmental Psychology	Olweus, Dan	drop
144	786020339	Comparing student perceptions of coping strategies and school interventions in managing bullying and cyberbullying incidents.	2012	Pastoral Care in Education	Paul, Simone and Smith, PeterK. and Blumberg, HerbertH.	drop
145	786020340	Conducta antisocial: conexiÃ³n con bullying/cyberbullying y estrategias de resoluciÃ³n de conflictos.	2017	Antisocial behavior: Connection with bullying/cyberbullying and conflict resolution.	Garaigordobil, Maite	drop
146	786020341	Consequences of Bullying on Adolescents' Mental Health in Germany: Comparing Face-to-Face Bullying and Cyberbullying.	2019	Journal of Child & Family Studies	Baier, Dirk and Hong, Jun Sung and Kliem, SÃ¶ren and Bergmann, Marie Christine	drop
147	786020342	Continuity and Overlap of Roles in Victims and Aggressors of Bullying and Cyberbullying in Adolescence: A Systematic Review.	2020	International journal of environmental research and public health	EstÃ©vez, EstefanÃ­a and CaÃ±as, Elizabeth and EstÃ©vez, JesÃºs F and Povedano, Amapola	drop
148	786020343	COVID-19 Information Overload and Cyber Aggression during the Pandemic Lockdown: The Mediating Role of Depression/Anxiety and the Moderating Role of Confucian Responsibility Thinking.	2022	International journal of environmental research and public health	Wang, Qiong and Luo, Xiao and Tu, Ruilin and Xiao, Tao and Hu, Wei	drop
149	786020344	Cyber and In-Person Intimate Partner Violence Victimization: Examining Maladaptive Psychosocial and Behavioral Correlates.	2020	Cyberpsychology	Melander, Lisa A. and Marganski, Alison J.	drop
150	786020345	Cyber victimization and psychological well-being among Chinese adolescents: Mediating role of basic psychological needs satisfaction and moderating role of positive parenting.	2021	Children & Youth Services Review	Jiang, Shan and Jiang, Chaoxin and Ren, Qiang and Wang, Lin	drop
151	786020346	Cyberbullying Among Adolescents: The Role of Affective and Cognitive Empathy, and Gender.	2010	Child Psychiatry & Human Development	Ang, Rebecca P. and Goh, Dion H.	drop
152	786020347	Cyberbullying Among Traditional and Complementary Medicine Practitioners in the Workplace: Protocol for a Cross-sectional Descriptive Study.	2021	JMIR research protocols	Kim, Yun Jin and Qian, Linchao and Aslam, Muhammad Shahzad	drop
153	786020348	Cyberbullying and cybervictimization: Does gender matter?	2021	Psychological reports	Marr, Kristy L and Duell, Mary N	drop
154	786020349	Cyberbullying in adolescents and youth in the Basque Country: prevalence of cybervictims, cyberaggressors, and cyberobservers.	2015	Journal of Youth Studies	Garaigordobil, Maite	drop
155	786020350	Cyberbullying in Pakistan: Positioning the Aggressor, Victim, and Bystander.	2019	Pakistan Journal of Psychological Research	Rafi, Muhammad Shaban	drop
156	786020351	Cyberbullying in those at clinical high risk for psychosis.	2013	Early intervention in psychiatry	Magaud, Emilie and Nyman, Karissa and Addington, Jean	drop
157	786020352	Cyberbullying perpetration and victimisation among junior and senior high school students in Guangzhou, China.	2019	Injury prevention : journal of the International Society for Child and Adolescent Injury Prevention	Rao, Jiaming and Wang, Haiqing and Pang, Minhui and Yang, Jianwei and Zhang, Jiayi and Ye, Yunfeng and Chen, Xiongfei and Wang, Shengyong and Dong, Xiaomei	drop
158	786020353	Cyberbullying Victimization in Adolescents as Related to Body Esteem, Social Support, and Social Self-Efficacy.	2017	The Journal of genetic psychology	Olenik-Shemesh, Dorit and Heiman, Tali	drop
159	786020354	Cyberbullying: A preliminary assessment for school personnel.	2008	Psychology in the Schools	Mason, Kimberly L.	drop
160	786020355	Cyberbullying: its nature and impact in secondary school pupils.	2008	Journal of Child Psychology & Psychiatry	Smith, Peter K. and Mahdavi, Jess and Carvalho, Manuel and Fisher, Sonja and Russell, Shanette and Tippett, Neil	drop
161	786020356	Cybervictimization and Adolescent Internet Addiction: A Moderated Mediation Model.	2021	International journal of environmental research and public health	Xin, Mucheng and Chen, Pei and Liang, Qiao and Yu, Chengfu and Zhen, Shuangju and Zhang, Wei	drop
162	786020357	Cybervictimization, Offline Victimization, and Cyberbullying: The Mediating Role of the Problematic Use of Social Networking Sites in Boys and Girls.	2021	La cibervictimizaciÃ³n, la victimizaciÃ³n offline y el ciberbullying: el rol mediador del uso problemÃ¡tico de las redes sociales virtuales en chicos y chicas.	MartÃ­nez-Ferrer, MartÃ­nez-Ferrer and LeÃ³n-Moreno, Celeste and SuÃ¡rez-Relinque, Cristian and Del Moral-Arroyo, Gonzalo and Musitu-Ochoa, Gonzalo	drop
163	786020358	Development and validation of the Bullying and Cyberbullying Scale for Adolescents: A multi-dimensional measurement model.	2019	The British journal of educational psychology	Thomas, Hannah J and Scott, James G and Coates, Jason M and Connor, Jason P	drop
164	786020359	Development of a Personalized Mobile Mental Health Intervention for Workplace Cyberbullying Among Health Practitioners: Protocol for a Mixed Methods Study.	2020	JMIR research protocols	Kim, Yun Jin and Qian, Linchao and Aslam, Muhammad Shahzad	retrieved
165	786020360	Differences in Friendship Networks and Experiences of Cyberbullying Among Korean and Australian Adolescents.	2017	The Journal of genetic psychology	Lee, Jee Young and Kwon, Yeji and Yang, Soeun and Park, Sora and Kim, Eun-Mee and Na, Eun-Yeong	drop
166	786020361	Different forms of bullying and victimization: Bully-victims versus bullies and victims.	2013	European Journal of Developmental Psychology	Yang, An and Salmivalli, Christina	drop
167	786020362	Disentangling functions of online aggression: The Cyber-Aggression Typology Questionnaire (CATQ).	2017	Aggressive Behavior	Runions, Kevin C. and Bak, Michal and Shaw, ThÃ©rÃ¨se	drop
168	786020363	Do Stereotypes of Mental and Developmental Disorders Predict Bystander Intentions in Cyberbullying? An Application of the Stereotype Content Model.	2019	International Journal of Developmental Science	GÃ¶rzig, Anke and Bedrosova, Marie and Machackova, Hana and BondÃ¼, Rebecca and Scheithauer, Herbert	drop
169	786020364	Does Parental Mediation of Technology Use Moderate the Associations between Cyber Aggression Involvement and Substance Use? A Three-Year Longitudinal Study.	2019	International journal of environmental research and public health	Wright, Michelle F and Wachs, Sebastian	drop
170	786020365	Does the Information about Classroom Norms Change the Individual Injunctive Norms about Cyberbullying? â€“ A Minimal Intervention Study.	2018	International Journal of Developmental Science	Pfetsch, Jan and Schultze-Krumbholz, Anja and FÃ¼llgraf, Franziska and Scheithauer, Herbert and Stavrinides, Panayiotis and Fanti, Kostas	retrieved
171	786020366	Doxing: What Adolescents Look for and Their Intentions.	2019	International journal of environmental research and public health	Chen, Mengtong and Cheung, Anne Shann Yue and Chan, Ko Ling	drop
172	786020367	Early childhood parenting and adolescent bullying behavior: Evidence from a randomized intervention at ten-year follow-up.	2021	Social Science & Medicine	Kim, Jun Hyung and Hahlweg, Kurt and Schulz, Wolfgang	retrieved
173	786020368	Effectiveness of coping strategies for victims of cyberbullying.	2013	Cyberpsychology	Machackova, Hana and Cerna, Alena and Sevcikova, Anna and Dedkova, Lenka and Daneback, Kristian	drop
174	786020369	Effects of Cyberprogram 2.0 on "face-to-face" bullying, cyberbullying, and empathy.	2015	Efectos del Cyberprogram 2.0 en el bullying "cara-a-cara", el cyberbullying y la empatÃ­a.	MartÃ­nez-Valderrey, Vanesa and Garaigordobil, Maite	drop
175	786020370	Effects of the Action for Neutralization of Bullying Program on Bullying in Spanish Schoolchildren.	2021	International journal of environmental research and public health	MartÃ­nez-MartÃ­nez, Ana and Pineda, David and GalÃ¡n, Manuel and Marzo, Juan C and Piqueras, JosÃ© A	drop
176	786020371	Effects of traditional and cyber homophobic bullying in childhood on depression, anxiety, and physical pain in emerging adulthood and the moderating effects of social support among gay and bisexual men in Taiwan.	2018	Neuropsychiatric Disease & Treatment	Wang, Chien-Chuan and Lin, Huang-Chi and Chen, Mu-Hong and Ko, Nai-Ying and Chang, Yu-Ping and Lin, I-Mei and Yen, Cheng-Fang	drop
177	786020372	Effects of workplace cyberbullying on nurses' symptom experience and turnover intention.	2019	Journal of nursing management	Park, Mijeong and Choi, Jeong Sil	drop
178	786020373	Efficacy of the Online Mindfulness-based Logotherapy Program (OnlineMLP) on the Depressive Symptoms of Selected Cyberbullied Adolescents during Covid-19 Pandemic.	2021	Indian Journal of Health & Wellbeing	Jeyaseelan, Maria Michael and Reyes, Marc Eric S.	drop
179	786020374	Examination of Narcissistic Personality Traits' Predicting Level of Internet Addiction and Cyber Bullying through Path Analysis.	2012	Educational Sciences: Theory & Practice	EkÅŸÄ±, FÃ¼sun	drop
180	786020375	Examining Childhood Maltreatment and School Bullying Among Adolescents: A Cross-Sectional Study From Anhui Province in China.	2019	Journal of Interpersonal Violence	Wang, Geng-Fu and Jiang, Liu and Wang, Lu-Han and Hu, Guo-Yun and Fang, Yu and Yuan, Shan-Shan and Wang, Xiu-Xiu and Su, Pu-Yu	drop
181	786020376	Exploration of Cybercivility in Nursing Education Using Cross-Country Comparisons.	2020	International journal of environmental research and public health	Kim, Sang Suk and Lee, Jung Jae and De Gagne, Jennie C	drop
182	786020377	Exploring Modes, Strategies, and Psychosocial Consequences of Cyberbullying Perpetration and Victimization Among University Students.	2019	Pakistan Journal of Psychological Research	Kanwal, Hira and Jami, Humaira	drop
183	786020378	Exploring the Anti-bullying Role of a Befriending Peer Support Programme: A Case Study within the Primary School Setting in Northern Ireland.	2008	Child Care in Practice	McElearney, Aisling and Roosmale-Cocq, Selina and Scott, Joanne and Stephenson, Phyllis	drop
184	786020379	Exposure to Online Game Violence and Cyberbullying among Chinese Adolescents: Normative Beliefs about Aggression as a Mediator and Trait Aggressiveness as a Moderator.	2020	Journal of Aggression, Maltreatment & Trauma	Zhu, Xiao-Wei and Chu, Xiao-Wei and Zhang, Yan-Hong and Li, Zhen-Hua	drop
185	786020380	Facebook Fatalities: Students, Social Networking, and the First Amendment.	2011	Pace Law Review	Wheeler, Thomas	drop
186	786020381	Face-to-face and Cyber Victimization among Adolescents in Six Countries: The Interaction between Attributions and Coping Strategies.	2018	Journal of Child & Adolescent Trauma	Wright, Michelle F. and Yanagida, Takuya and MachÃ¡ÄkovÃ¡, Hana and DÄ›dkovÃ¡, Lenka and Å evÄÃ­kovÃ¡, Anna and Aoyama, Ikuko and Bayraktar, Fatih and Kamble, Shanmukh V. and Li, Zheng and Soudi, Shruti and Lei, Li and Shu, Chang	drop
187	786020382	Identity, relationships, sexuality, and risky behaviors of adolescents in the context of social media.	2017	Sexual & Relationship Therapy	Eleuteri, Stefano and Saladino, Valeria and Verrastro, Valeria	drop
188	786020383	I'm just trolling: The role of normative beliefs in aggressive behaviour in online gaming.	2020	Computers in Human Behavior	Hilvert-Bruce, Zorah and Neill, James T.	drop
189	786020384	Individual, Family, Peer, and School Risk Factors for Teacher Victimization.	2019	Educational Sciences: Theory & Practice	Sorrentino, Anna and Farrington, David P.	drop
190	786020385	Information Technology Use and Cyberbullying Behavior in South Thailand: A Test of the Goldilocks Hypothesis.	2020	International journal of environmental research and public health	Sittichai, Ruthaychonnee and Smith, Peter K	drop
191	786020386	In-person victimization, cyber victimization, and polyvictimization in relation to internalizing symptoms and self-esteem in adolescents with attention-deficit/hyperactivity disorder.	2021	Child: care, health and development	Fogleman, Nicholas D and McQuade, Julia D and Mehari, Krista R and Becker, Stephen P	drop
192	786020387	Insecure Attachment, Maladaptive Personality Traits, and the Perpetration of In-Person and Cyber Psychological Abuse.	2021	Journal of interpersonal violence	Bui, Nghi H and Pasalich, Dave S	drop
193	786020388	Instigators of Cyber-Bullying: A New Strategy for New Players.	2019	Journal of Creativity in Mental Health	Hicks, Janet and Clair, Brian Le and Waltz, Macy and Corvette, Michelle and Berry, Steve	retrieved
194	786020389	Intergenerational differences in the intention to use psychological cybercounseling: A Chinese case study.	2020	Patient Education & Counseling	Teo, Timothy and Shi, Wei and Huang, Fang and Hoi, Cathy Ka Weng	drop
195	786020390	Internet addiction mediates the association between cyber victimization and psychological and physical symptoms:moderation by physical exercise.	2020	BMC psychiatry	Lin, Ling and Liu, Jianbo and Cao, Xiaolan and Wen, Siying and Xu, Jianchang and Xue, Zhenpeng and Lu, Jianping	drop
196	786020391	Internet Misconduct Impact Adolescent Mental Health in Taiwan: The Moderating Roles of Internet Addiction.	2016	International Journal of Mental Health & Addiction	Yu, Tai-Kuei and Chao, Cheng-Min	drop
197	786020392	Irresponsible Radicalisation: Diasporas, Globalisation and Long-Distance Nationalism in the Digital Age.	2012	Journal of Ethnic & Migration Studies	Conversi, Daniele	drop
198	786020393	Is life today bad for teens?: Headlines claim our teenagers are in the midst of a mental health crisis. The reality is far more complex, says Clare Wilson.	2017	New Scientist	Wilson, Clare	drop
199	786020394	Longitudinal cross-lagged analyses between cyberbullying perpetration, mindfulness and depression among Chinese high school students.	2021	Journal of Health Psychology	Yuan, Guangzhe and Liu, Zhen	drop
200	786020395	Mediating Effect of Internet Addiction on the Relationship Between Individualism and Cyberbullying: Cross-Sectional Questionnaire Study.	2020	Journal of medical Internet research	Arpaci, Ibrahim and Abdeljawad, Thabet and BaloÄŸlu, Mustafa and Kesici, Åžahin and Mahariq, Ibrahim	drop
201	786020396	Mental health services use among adolescent bullying victims in Australia: Results from a nationwide survey.	2022	Children & Youth Services Review	Islam, Md Irteja and Yunus, Fakir Md. and Salam, Shumona Sharmin and Kabir, Enamul and Khanam, Rasheda	drop
202	786020397	Online Pestkoppenstoppen: systematic and theory-based development of a web-based tailored intervention for adolescent cyberbully victims to combat and prevent cyberbullying.	2014	BMC Public Health	Jacobs, Niels C. L. and VÃ¶llink, Trijntje and Dehue, Francine and Lechner, Lilian	drop
203	786020398	Parent-Child Attachment Moderates the Associations Between Cyberbullying Victimization and Adolescents' Health/Mental Health Problems: An Exploration of Cyberbullying Victimization Among Chinese Adolescents.	2021	Journal of interpersonal violence	Zhu, Yuhong and Li, Wen and O'Brien, Jennifer E and Liu, Tingting	drop
204	786020399	Peer relations and different functions of cyber-aggression: A longitudinal study in Chinese adolescents.	2022	Aggressive behavior	Ding, Xinfang and Liu, Bingzhou and Zeng, Ke and Kishimoto, Tomoko and Zhang, Manhua	drop
205	786020400	Prevalence and Psychosocial Predictors of Homophobic Victimization among Adolescents.	2019	International journal of environmental research and public health	RodrÃ­guez-Hidalgo, Antonio J and Hurtado-Mellado, Almudena	drop
206	786020401	Psycho-Emotional Violence, Its Association, Co-Occurrence, and Bidirectionality with Cyber, Physical and Sexual Violence.	2020	Journal of Child & Adolescent Trauma	Paat, Yok-Fong and Markham, Christine and Peskin, Melissa	drop
207	786020402	Quality of life of gay and bisexual men during emerging adulthood in Taiwan: Roles of traditional and cyber harassment victimization.	2019	PloS one	Hu, Huei-Fan and Chang, Yu-Ping and Lin, Chienho and Yen, Cheng-Fang	drop
208	786020403	Rates of bullying perpetration and victimisation: a longitudinal study of secondary school students in Victoria, Australia.	2012	Pastoral Care in Education	Hemphill, SherylA. and Tollit, Michelle and Kotevski, Aneta	drop
209	786020404	Reducing Cyber-bullying and Problem Behaviors among Students through Parental Group Therapy.	2016	Pakistan Journal of Psychological Research	Sandhu, Damanjit and Kaur, Shubhdip	retrieved
210	786020405	Reducing cyberbullying: A theory of reasoned action-based video prevention program for college students.	2016	Aggressive Behavior	Doane, Ashley N. and Kelley, Michelle L. and Pearson, Matthew R.	retrieved
211	786020406	Relational Aggression in Schools: Implications for Future Research on Screening Intervention and Prevention.	2010	School Psychology Review	Walker, Hill M.	drop
212	786020407	Remaining connected in the face of cyberbullying: Why social connectedness is important for mental health.	2019	Psychology in the Schools	McLoughlin, Larisa T. and Spears, Barbara A. and Taddeo, Carmel M. and Hermens, Daniel F.	drop
213	786020408	Retrospective Experiences of Cyberbullying and Emotional Outcomes on Young Adults Who Stutter.	2018	Journal of Child & Adolescent Trauma	Nicolai, Stephanie and Geffner, Robert and Stolberg, Ronald and Yaruss, J. Scott	drop
214	786020409	Risk Factors Associated with Cyberbullying, Cybervictimization, and Cyberbullying-Victimization in Iran's High School Students.	2021	Iranian Journal of Psychiatry	Azami, Mohammad Saeed and Taremian, Farhad	drop
215	786020410	Risk Factors Influencing Cyberbullying Perpetration among Middle School Students in Korea: Analysis Using the Zero-Inflated Negative Binomial Regression Model.	2021	International journal of environmental research and public health	Kang, Kyung Im and Kang, Kyonghwa and Kim, Chanhee	drop
216	786020411	Safety.Net: A Pilot Study on a Multi-Risk Internet Prevention Program.	2021	International journal of environmental research and public health	Ortega-BarÃ³n, JÃ©ssica and GonzÃ¡lez-Cabrera, JoaquÃ­n and Machimbarrena, Juan M and Montiel, Irene	retrieved
217	786020412	School bullying and bare life: Challenging the state of exception.	2019	Educational Philosophy & Theory	Horton, Paul	drop
218	786020413	Self-exploration, anonymity and risks in the online setting: analysis of narratives by 14â€“18-year olds.	2014	Journal of Youth Studies	Keipi, Teo and Oksanen, Atte	drop
219	786020414	Self-Harm, Suicidal Behaviours, and Cyberbullying in Children and Young People: Systematic Review.	2018	Journal of medical Internet research	John, Ann and Glendenning, Alexander Charles and Marchant, Amanda and Montgomery, Paul and Stewart, Anne and Wood, Sophie and Lloyd, Keith and Hawton, Keith	drop
220	786020415	Social media, cyber-aggression and student mental health on a university campus.	2018	Journal of Mental Health	Mishna, Faye and Regehr, Cheryl and Lacombe-Duncan, Ashley and Daciuk, Joanne and Fearing, Gwendolyn and Van Wert, Melissa	drop
221	786020416	Strain, negative emotion, and cyber violence among South Korean Juveniles: A mediation analysis.	2020	Children & Youth Services Review	Cho, Yeokil and DioGuardi, Sherri	drop
222	786020417	Teachers' perceptions, beliefs and concerns about cyberbullying.	2013	British Journal of Educational Technology	Eden, Sigal and Heiman, Tali and Olenik-Shemesh, Dorit	drop
223	786020418	Testing the Effectiveness of an E-Course to Combat Cyberbullying.	2019	Cyberpsychology, behavior and social networking	Leung, Angel Nga Man and Wong, Natalie and Farver, JoAnn M	retrieved
224	786020419	The Associations Between Workplace Bullying and Physical or Psychological Negative Symptoms: Anxiety and Depression as Mediators.	2019	Europe's Journal of Psychology	Lo Presti, Alessandro and Pappone, Paolo and Landolfi, Alfonso	drop
225	786020420	The bidirectional relationships between peer victimization and internalizing problems in school-aged children: An updated systematic review and meta-analysis.	2021	Clinical Psychology Review	Christina, Stefanny and Magson, Natasha R. and Kakar, Vani and Rapee, Ronald M.	drop
226	786020421	The Cyberbullying Picture Series (CyPicS): Developed for Use in Cyberbullying and Cyberbystander Research.	2021	Psychological reports	McLoughlin, Larisa T and Broadhouse, Kathryn M and Clacy, Amanda and Winks, Natalie and Lagopoulos, Jim and Hermens, Daniel F	retrieved
227	786020422	The Dosage, Context, and Modality of Interventions to Prevent Cyberbullying Perpetration and Victimization: a Systematic Review.	2021	Prevention science : the official journal of the Society for Prevention Research	Doty, Jennifer L and GirÃ³n, Karla and Mehari, Krista R and Sharma, Drishti and Smith, Sarah J and Su, Yi-Wen and Ma, Xiaoqi and Rijo, Diana and Rousso, Bailee	drop
228	786020423	The Effect of Cognitive Behavioural Group Therapy on the Workplace and Decisional Procrastination of Midwives: A Randomized Controlled Trial.	2020	Iranian Journal of Nursing & Midwifery Research	Moharramnejadifard, Monireh and Saed, Omid and Taheri, Seyede Solmaz and Ahmadnia, Elahe	drop
229	786020424	The Effectiveness of Educational Interventions on Traditional Bullying and Cyberbullying Among Adolescents: A Systematic Review and Meta-Analysis.	2022	Trauma, violence & abuse	Ng, Esperanza Debby and Chua, Joelle Yan Xin and Shorey, Shefaly	drop
230	786020425	The Impact of Adolescent Internet Addiction on Sexual Online Victimization: The Mediating Effects of Sexting and Body Self-Esteem.	2021	International journal of environmental research and public health	Tamarit, Alicia and Schoeps, Konstanze and Peris-HernÃ¡ndez, Montserrat and Montoya-Castilla, Inmaculada	drop
231	786020426	Thematic Section Guest Editorial: 24th Workshop on Aggression: International Perspectives on Bullying, Segregation, and Inclusion.	2020	International Journal of Developmental Science	Fandrem, Hildegunn and Strohmeier, Dagmar	drop
232	786020427	Transitions in aggression among children: Effects of gender and exposure to online violence.	2021	Aggressive behavior	Chiang, Jeng-Tung and Chang, Fong-Ching and Lee, Kun-Wei	drop
233	786020428	Using Solution-Focused Dramatic Empathy Training to Eliminate Cyber-Bullying.	2016	Journal of Creativity in Mental Health	Froeschle Hicks, Janet and Le Clair, Brian and Berry, Stephan	retrieved
234	786020429	We have the weapons to beat cyberbullying.	2014	TES: Times Educational Supplement	RIVERS, IAN	drop
235	786020430	The prevalence and motivations for password sharing practices and intrusive behaviors among early adolescentsâ€™ best friendships â€“ A mixed-methods study	2021	Telematics and Informatics	Van Ouytsel, Joris	drop
236	786020431	Digital metamorphosis: Examination of the bystander culture in cyberbullying	2014	Aggression and Violent Behavior	Wong-Lo, Mickie and Bullock, Lyndal M.	drop
237	786020432	Education Policy Implications from the Expert Panel on Electronic Media and Youth Violence	2007	Youth Violence and Electronic Media: Similar Behaviors, Different Venues?	Worthen, Maria R.	drop
238	786020433	Name-calling, jealousy, and break-ups: Teen girlsâ€™ and boysâ€™ worst experiences of digital dating	2020	Children and Youth Services Review	Reed, Lauren A. and Conn, Kourtney and Wachter, Karin	drop
239	786020434	Online trolling: The case of Madeleine McCann	2017	Computers in Human Behavior	Synnott, John and Coulias, Andria and Ioannou, Maria	drop
240	786020435	Beautiful victims: How the halo of attractiveness impacts judgments of celebrity and lay victims of online abuse	2022	Computers in Human Behavior	Hand, Christopher J. and Scott, Graham G.	drop
241	786020436	Comparing electronic and traditional bullying in embarrassment and exclusion scenarios	2017	Computers in Human Behavior	Asher, Yvonne and Stark, Abigail and Fireman, Gary D.	drop
242	786020437	Brief report: Associations between in-person and electronic bullying victimization and missing school because of safety concerns among U.S. high school students	2015	Journal of Adolescence	Steiner, Riley J. and Rasberry, Catherine N.	drop
243	786020438	The impact and response to electronic bullying and traditional bullying among adolescents	2015	Computers in Human Behavior	Horner, Stacy and Asher, Yvonne and Fireman, Gary D.	drop
244	786020439	Third Party Observers Witnessing Cyber Bullying on Social Media Sites	2013	The 3rd World Conference on Psychology, Counseling and Guidance, WCPCG-2012	Carter, Margaret Anne	drop
245	786020440	Electronic Bullying Among Middle School Students	2007	Youth Violence and Electronic Media: Similar Behaviors, Different Venues?	Kowalski, Robin M. and Limber, Susan P.	drop
246	786020441	The changing face of bullying: An empirical comparison between traditional and internet bullying and victimization	2012	Computers in Human Behavior	Law, Danielle M. and Shapka, Jennifer D. and Hymel, Shelley and Olson, Brent F. and Waterhouse, Terry	drop
247	786020442	Describing the voice of online bullying: An analysis of stance and voice type in YouTube comments	2022	Discourse, Context & Media	McCambridge, Laura	drop
248	786020443	Beyond â€˜having a domestic'? Regulatory interpretation of European Data Protection Law and individual publication	2017	Computer Law & Security Review	Erdos, David	drop
249	786020444	Unique effects of different components of trait emotional intelligence in traditional bullying and cyberbullying	2014	Journal of Adolescence	Baroncelli, Andrea and Ciucci, Enrica	drop
250	786020445	Examining cyberbullying across the lifespan	2017	Computers in Human Behavior	Barlett, Christopher P. and Chamberlin, Kristina	drop
251	786020446	Sexual and physical violence victimization among senior high school students in Ghana: Risk and protective factors	2015	Social Science & Medicine	Ohene, Sally-Ann and Johnson, Kiana and Atunah-Jay, Sarah and Owusu, Andrew and Borowsky, Iris Wagman	drop
252	786020447	Cyber victimization in middle school and relations to social emotional outcomes	2014	Computers in Human Behavior	Brown, Christina F. and Demaray, Michelle Kilpatrick and Secord, Stephanie M.	drop
253	786020448	e-Youth before its judges â€“ Legal protection of minors in cyberspace	2011	Computer Law & Security Review	Poullet, Yves	drop
254	786020449	Electronic and School Bullying Victimization by Race/Ethnicity and Sexual Minority Status in a Nationally Representative Adolescent Sample	2021	Journal of Adolescent Health	Webb, Lindsey and Clary, Laura K. and Johnson, Renee M. and Mendelson, Tamar	drop
255	786020450	Suicidal ideation and suicide attempts among youth who report bully victimization, bully perpetration and/or low social connectedness	2016	Journal of Adolescence	Arango, Alejandra and Opperman, Kiel J. and Gipson, Polly Y. and King, Cheryl A.	drop
256	786020451	Cyberbullying: Concepts, theories, and correlates informing evidence-based best practices for prevention	2020	Aggression and Violent Behavior	Ansary, Nadia S.	drop
257	786020452	Ongoing and online: Children and youth's perceptions of cyber bullying	2009	Children and Youth Services Review	Mishna, Faye and Saini, Michael and Solomon, Steven	drop
258	786020453	Digital era bullying: An examination of adolescent judgments about bystander intervention online	2021	Journal of Applied Developmental Psychology	Herry, Emily and GÃ¶nÃ¼ltaÅŸ, SeÃ§il and Mulvey, Kelly Lynn	drop
259	786020454	Prevalence and Predictors of Internet Bullying	2007	Youth Violence and Electronic Media: Similar Behaviors, Different Venues?	Williams, Kirk R. and Guerra, Nancy G.	drop
260	786020455	Consistency of gender differences in bullying in cross-cultural surveys	2019	Bullying and cyberbullying: Protective factors and effective interventions	Smith, Peter K. and LÃ³pez-Castro, Leticia and Robinson, Susanne and GÃ¶rzig, Anke	drop
261	786020456	Lifestyles and routine activities: Do they enable different types of cyber abuse?	2019	Computers in Human Behavior	Vakhitova, Zarina I. and Alston-Knox, Clair L. and Reynald, Danielle M. and Townsley, Michael K. and Webster, Julianne L.	drop
262	786020457	Cyberbullying: Topics, strategies, and sex differences	2017	Computers in Human Behavior	Brody, Nicholas and Vangelisti, Anita L.	drop
263	786020458	Psychological, Physical, and Academic Correlates of Cyberbullying and Traditional Bullying	2013	The Relationship Between Youth Involvement in Bullying and Suicide	Kowalski, Robin M. and Limber, Susan P.	drop
264	786020459	Perceptions and attributions of bystanders to cyber bullying	2014	Computers in Human Behavior	Holfeld, Brett	drop
265	786020460	Czech Children and Facebook â€“ A quantitative survey	2016	Telematics and Informatics	KopeckÃ½, Kamil	drop
266	786020461	The affinity between online and offline anti-Muslim hate crime: Dynamics and impacts	2016	Aggression and Violent Behavior	Awan, Imran and Zempi, Irene	drop
267	786020462	Students in distress: Unanticipated findings in a cyber bullying study	2014	Children and Youth Services Review	Mishna, Faye and Schwan, Kaitlin J. and Lefebvre, Rachael and Bhole, Payal and Johnston, David	drop
268	786020463	Cyber-bullying and young people: How Hong Kong keeps the new playground safe	2015	Computer Law & Security Review	Ong, Rebecca	drop
269	786020464	Cyber and Bias-based Harassment: Associations With Academic, Substance Use, and Mental Health Problems	2012	Journal of Adolescent Health	Sinclair, Katerina O. and Bauman, Sheri and Poteat, V. Paul and Koenig, Brian and Russell, Stephen T.	drop
270	786020465	Risk factors for involvement in cyber bullying: Victims, bullies and bullyâ€“victims	2012	Children and Youth Services Review	Mishna, Faye and Khoury-Kassabri, Mona and Gadalla, Tahany and Daciuk, Joanne	drop
271	786020466	School Bullying Among Adolescents in the United States: Physical, Verbal, Relational, and Cyber	2009	Journal of Adolescent Health	Wang, Jing and Iannotti, Ronald J. and Nansel, Tonja R.	drop
272	786020467	Patterns of adolescent bullying behaviors: Physical, verbal, exclusion, rumor, and cyber	2012	Journal of School Psychology	Wang, Jing and Iannotti, Ronald J. and Luk, Jeremy W.	drop
273	786020468	Psychological consequences of cyber bullying experiences among Turkish secondary school children	2010	Innovation and Creativity in Education	Baker, Ã–zgÃ¼r Erdur and TanrÄ±kulu, Ä°brahim	drop
274	786020469	Surf and Turf Wars Onlineâ€”Growing Implications of Internet Gang Violence	2007	Youth Violence and Electronic Media: Similar Behaviors, Different Venues?	King, Jonathan E. and Walpole, Carolyn E. and Lamon, Kristi	drop
275	786020470	Brief report: Text bullying and traditional bullying among New Zealand secondary school students	2010	Journal of Adolescence	Marsh, Louise and McGee, Rob and Nada-Raja, Shyamala and Williams, Sheila	drop
276	786020471	Adolescent Predictors of Young Adult Cyberbullying Perpetration and Victimization Among Australian Youth	2014	Journal of Adolescent Health	Hemphill, Sheryl A. and Heerde, Jessica A.	drop
277	786020472	Does empathy predict (cyber) bullying perpetration, and how do age, gender and nationality affect this relationship?	2016	Learning and Individual Differences	Del Rey, Rosario and Lazuras, Lambros and Casas, JosÃ© A. and Barkoukis, Vassilis and Ortega-Ruiz, Rosario and Tsorbatzoudis, Haralambos	drop
278	786020473	Cyber victim and bullying scale: A study of validity and reliability	2011	Computers & Education	Ã‡etin, Bayram and Yaman, Erkan and Peker, Adem	drop
279	786020474	Determination of the Level of Being Cyber Bully/Victim of Eighth Grade Students of Elementary Schools	2015	International Educational Technology Conference, IETC 2014, 3-5 September 2014, Chicago, IL, USA	Karabacak, Kerim and Ã–ztunÃ§, Mustafa and EksioÄŸlu, Subhan and ErdoÄŸan, Duygu GÃ¼r and Yar, SongÃ¼l and Ekenler, Dilvin and Selim, KÃ¼bra	drop
280	786020475	The Effects of Netiquette and ICT Skills on School-bullying and Cyber-bullying: The Two-wave Panel Study of Japanese Elementary, Secondary, and High School Students	2011	The 2nd International Conference on Education and Educational Psychology 2011	Kumazaki, Ayuchi and Suzuki, Kanae and Katsura, Rui and Sakamoto, Akira and Kashibuchi, Megumi	drop
281	786020476	An investigation of anonymous and spoof SMS resources used for the purposes of cyberstalking	2015	Digital Investigation	Horsman, Graeme and Conniss, Lynne R.	drop
282	786020477	Cyberbullying: Review of an Old Problem Gone Viral	2015	Journal of Adolescent Health	Aboujaoude, Elias and Savage, Matthew W. and Starcevic, Vladan and Salame, Wael O.	drop
283	786020478	Prevalence and personality correlates of Facebook bullying among university undergraduates	2016	Computers in Human Behavior	Kokkinos, Constantinos M. and Baltzidis, Eleftherios and Xynogala, Danae	drop
284	786020479	Cyber and Traditional Bullying: Differential Association With Depression	2011	Journal of Adolescent Health	Wang, Jing and Nansel, Tonja R. and Iannotti, Ronald J.	drop
285	786020480	Does Online Harassment Constitute Bullying? An Exploration of Online Harassment by Known Peers and Online-Only Contacts	2007	Youth Violence and Electronic Media: Similar Behaviors, Different Venues?	Wolak, Janis and Mitchell, Kimberly J. and Finkelhor, David	drop
286	786020481	Positive affect predicting worker psychological response to cyber-bullying in the high-tech industry in Northern Taiwan	2014	Computers in Human Behavior	Hong, Jon-Chao and Chien-Hou, Lin and Hwang, Ming-Yueh and Hu, Ru-Ping and Chen, Yi-Ling	drop
287	786020482	Bullying and cyberbullying: Convergent and divergent predictor variables	2013	Computers in Human Behavior	Casas, JosÃ© A. and Del Rey, Rosario and Ortega-Ruiz, Rosario	drop
288	786020483	Relationship between cyberbullying and readiness for aggressive behavior in middle adolescence	2011	The 2nd International Conference on Education and Educational Psychology 2011	Slaninova, Gabriela and Haviger, Jiri and Novotna, Lucie and Sochorova, Petra and Vackova, Michaela	drop
289	786020484	The Use of Multimedia in Increasing Perceived Knowledge and Awareness of Cyber-bullying among Adolescents: A Pilot Study	2015	International Educational Technology Conference, IETC 2014, 3-5 September 2014, Chicago, IL, USA	Wahab, Nadia Abdul and Yahaya, Wan Ahmad Jaafar Wan and Muniandy, Balakrishnan	retrieved
290	786020485	What is Upsetting Our Children Online?	2014	The International Conference on Communication and Media 2014 (i-COMEâ€™14) - Communication, Empowerment and Governance: The 21st Century Enigma	Teimouri, Misha and Hassan, Md Salleh and Bolong, Jusang and Daud, Azlina and Yussuf, Serina and Adzharuddin, Nor Azura	drop
291	786020486	Correlates of traditional bullying and cyberbullying perpetration among Australian students	2015	Children and Youth Services Review	Tanrikulu, Ibrahim and Campbell, Marilyn	drop
292	786020487	Stalking: Patterns, motives, and intervention strategies	2012	Aggression and Violent Behavior	Miller, Laurence	drop
293	786020488	Cyber-bullying: An investigation of the psychological profile of university student participants	2014	Journal of Applied Developmental Psychology	Kokkinos, Constantinos M. and Antoniadou, Nafsika and Markos, Angelos	drop
294	786020489	Navigating the extended reach: Target experiences of cyberbullying at work	2013	Information and Organization	D'Cruz, Premilla and Noronha, Ernesto	drop
295	786020490	Prevalence of cyberbullying victimization among Pakistani Youth	2021	Technology in Society	Saleem, Sumera and Khan, Naurin Farooq and Zafar, Saad	drop
296	786020491	Sexting, pressured sexting and image-based sexual abuse among a weighted-sample of heterosexual and LGB-youth	2021	Computers in Human Behavior	Van Ouytsel, Joris and Walrave, Michel and De Marez, Lieven and Vanhaelewyn, Bart and Ponnet, Koen	drop
297	786020492	Electronic displays of aggression in teen dating relationships: Does the social ecology matter?	2017	Computers in Human Behavior	Smith-Darden, Joanne P. and Kernsmith, Poco D. and Victor, Bryan G. and Lathrop, Rachel A.	drop
298	786020493	The efficacy of the Friendly Attac serious digital game to promote prosocial bystander behavior in cyberbullying among young adolescents: A cluster-randomized controlled trial	2018	Computers in Human Behavior	DeSmet, A. and Bastiaensens, S. and Van Cleemput, K. and Poels, K. and Vandebosch, H. and Deboutte, G. and Herrewijn, L. and Malliet, S. and Pabian, S. and Van Broeckhoven, F. and De Troyer, O. and Deglorie, G. and Van Hoecke, S. and Samyn, K. and De Bourdeaudhuij, I.	retrieved
299	786020494	Somebody that I (used to) know: Gender and dimensions of dark personality traits as predictors of intimate partner cyberstalking	2020	Personality and Individual Differences	March, Evita and Litten, Verity and Sullivan, Danny H. and Ward, Louise	drop
300	786020495	Through the magnifying glass: Empathy's differential role in preventing and promoting traditional and cyberbullying	2019	Computers in Human Behavior	Graf, Daniel and Yanagida, Takuya and Spiel, Christiane	drop
301	786020496	Sexting within young adultsâ€™ dating and romantic relationships	2020	Cyberpsychology	Van Ouytsel, Joris and Punyanunt-Carter, Narissra M and Walrave, Michel and Ponnet, Koen	drop
302	786020497	Recent and emerging technologies: Implications for women's safety	2019	Technology in Society	Cardoso, Lauren F. and Sorenson, Susan B. and Webb, Olivia and Landers, Sara	drop
303	786020498	Being a cybervictim and a cyberbully â€“ The duality of cyberbullying: A meta-analysis	2020	Computers in Human Behavior	Lozano-Blasco, Raquel and CortÃ©s-Pascual, Alejandra and Latorre-MartÃ­nez, M.Pilar	drop
304	786020499	Exploring associations between school environment and bullying in Iran: Multilevel contextual effects modeling	2019	Children and Youth Services Review	Rezapour, Maysam and Khanjani, Narges and Mirzai, Moghadameh	drop
305	786020500	The maladaptive side of Internet altruists: Relationship between Internet altruistic behavior and cyberbullying victimization	2022	Children and Youth Services Review	Geng, Jingyu and Bao, Ling and Wang, Jing and Wei, Xinyi and Zeng, Pan and Lei, Li	drop
306	786020501	Cyberstalking: Investigating formal intervention and the role of Corporate Social Responsibility	2017	Telematics and Informatics	al-Khateeb, Haider M. and Epiphaniou, Gregory and Alhaboby, Zhraa A. and Barnes, James and Short, Emma	drop
307	786020502	Passive, invasive, and duplicitous: Three forms of intimate partner cyberstalking	2022	Personality and Individual Differences	March, Evita and Szymczak, Piotr and Di Rago, Melissa and Jonason, Peter K.	drop
308	786020503	Profiles of adolescent traditional and cyber bullying and victimization: The role of demographic, individual, family, school, and peer factors	2020	Computers in Human Behavior	Ding, Yue and Li, Dongping and Li, Xian and Xiao, Jiale and Zhang, Haiyan and Wang, Yanhui	drop
309	786020504	Examining the association between exposure to various screen time sedentary behaviours and cannabis use among youth in the COMPASS study	2019	SSM - Population Health	Doggett, Amanda and Qian, Wei and Godin, Katelyn and De Groh, Margaret and Leatherdale, Scott T.	drop
310	786020505	Differences in family climate and family communication among cyberbullies, cybervictims, and cyber bullyâ€“victims in adolescents	2017	Computers in Human Behavior	Buelga, SofÃ­a and MartÃ­nezâ€“Ferrer, BelÃ©n and Cava, MarÃ­aâ€“JesÃºs	drop
311	786020506	Online child sexual exploitation and abuse: A community diagnosis using the social norms theory	2019	Child Abuse & Neglect	Ramiro, Laurie S. and Martinez, Andrea B. and Tan, Janelle Rose D. and Mariano, Kachela and Miranda, Gaea Marelle J. and Bautista, Greggy	drop
312	786020507	Prevalence and associated factors of Internet gaming disorder among secondary school students in Chachoengsao Province, Thailand	2018	European Congress of Epidemiology â€œCrises, epidemiological transitions and the role of epidemiologistsâ€	Taechoyotin, P. and Tongro, P. and Piyaraj, P.	drop
313	786020508	Bullying types and roles in early adolescence: Latent classes of perpetrators and victims	2021	Journal of School Psychology	Coyle, Samantha and Cipra, Alli and Rueger, Sandra Yu	drop
314	786020509	Prevalence and associated factors of traditional bully among population-based sample of secondary school students in rural community, Thailand	2018	European Congress of Epidemiology â€œCrises, epidemiological transitions and the role of epidemiologistsâ€	Lertpheantum, C. and Piyaraj, P.	drop
315	786020510	Sextortion of Minors: Characteristics and Dynamics	2018	Journal of Adolescent Health	Wolak, Janis and Finkelhor, David and Walsh, Wendy and Treitman, Leah	drop
316	786020511	Predicting perpetration of intimate partner cyberstalking: Gender and the Dark Tetrad	2017	Computers in Human Behavior	Smoker, Melissa and March, Evita	drop
317	786020512	Recognition and prevention of cyberharassment in social media using classification algorithms	2021	Materials Today: Proceedings	Rajesh, Sudha and Sharanya, B	drop
318	786020513	Violent video game exposure and (Cyber)bullying perpetration among Chinese youth: The moderating role of trait aggression and moral identity	2020	Computers in Human Behavior	Teng, Zhaojun and Nie, Qian and Zhu, Zhengguang and Guo, Cheng	drop
319	786020514	Psychometric properties of the Turkish version of the Bullying and Cyber Bullying Scale for Adolescents (BCS-A)	2020	Psychiatry Research	Ã–zbey, Harun and BaÅŸdaÅŸ, Ã–znur	drop
320	786020515	Does bullying victimization really influence adolescentsâ€™ psychosocial problems? A three-wave longitudinal study in China	2019	Journal of Affective Disorders	Chu, Xiao-Wei and Fan, Cui-Ying and Lian, Shuai-Lei and Zhou, Zong-Kui	drop
321	786020516	Factors Affecting Jordanian School Adolescents' Experience of Being Bullied	2018	Journal of Pediatric Nursing	Shaheen, Abeer M. and Hammad, Sawsan and Haourani, Eman M. and Nassar, Omayyah S.	drop
322	786020517	Self-esteem, empathy and their impacts on cyberbullying among young adults	2018	Telematics and Informatics	Balakrishnan, Vimala and Fernandez, Terence	drop
323	786020518	Risk perceptions of cyber-security and precautionary behaviour	2017	Computers in Human Behavior	van Schaik, Paul and Jeske, Debora and Onibokun, Joseph and Coventry, Lynne and Jansen, Jurjen and Kusev, Petko	drop
324	786020519	Concurrent and longitudinal associations between early adolescents' experiences of school climate and cyber victimization	2017	Computers in Human Behavior	Holfeld, Brett and Leadbeater, Bonnie J.	drop
325	786020520	Cyber violence: What do we know and where do we go from here?	2017	Aggression and Violent Behavior	Peterson, Jillian and Densley, James	drop
326	786020521	Cyberviolence et cyberharcÃ¨lement. Une violence fantasmatique pour lâ€™agresseur, une violence traumatique pour la victime	2020	Neuropsychiatrie de l'Enfance et de l'Adolescence	Tordo, F.	drop
327	786020522	Latent profiles of offline/cyber bullying experiences among Korean students and its relationship with peer conformity	2020	Children and Youth Services Review	Kim, Bu Kyung and Park, Jisu and Jung, Hi Jae and Han, Yoonsun	drop
328	786020523	The effect of parental style on bullying and cyber bullying behaviors and the mediating role of peer attachment relationships: A longitudinal study	2018	Journal of Adolescence	Charalampous, Kyriakos and Demetriou, Constantina and Tricha, Loukia and Ioannou, Myria and Georgiou, Stelios and Nikiforou, Militsa and Stavrinides, Panayiotis	drop
329	786020524	Development of a causal relationship model for cyber bullying behaviors among public secondary school students in the three southern border provinces of Thailand	2019	Children and Youth Services Review	Tudkuea, T. and Laeheem, K. and Sittichai, R.	drop
330	786020525	Cyber-bullying and cyber-victimization among undergraduate student teachers through the lens of the General Aggression Model	2019	Computers in Human Behavior	Kokkinos, Constantinos M. and Antoniadou, Nafsika	drop
331	786020526	Longitudinal associations between sexting, cyberbullying, and bullying among adolescents: Cross-lagged panel analysis	2019	Journal of Adolescence	Van Ouytsel, Joris and Lu, Yu and Ponnet, Koen and Walrave, Michel and Temple, Jeff R.	drop
332	786020527	The Dark Tetrad traits and problematic social media use: The mediating role of cyberbullying and cyberstalking	2018	Personality and Individual Differences	Kircaburun, Kagan and Jonason, Peter K. and Griffiths, Mark D.	drop
333	786020528	Modifiable predictors of insufficient sleep durations: A longitudinal analysis of youth in the COMPASS study	2018	Preventive Medicine	Patte, Karen A. and Qian, Wei and Leatherdale, Scott T.	drop
334	786020529	Homophobia is online: Sexual victimization and risks on the internet and mental health among bisexual, homosexual, pansexual, asexual, and queer adolescents	2021	Computers in Human Behavior	GÃ¡mez-Guadix, Manuel and Incera, Daniel	drop
335	786020530	Adapting to attrition challenges in multi-year studies: Examples from a school-based bullying and cyber bullying study	2017	Children and Youth Services Review	Mishna, Faye and McInroy, Lauren B. and Daciuk, Joanne and Lacombe-Duncan, Ashley	drop
336	786020531	The drawbacks of Information and Communication Technologies: Interplay and psychopathological risk of nomophobia and cyber-bullying, results from the bullying and youth mental health Naples study (BYMHNS)	2020	Computers in Human Behavior	Catone, Gennaro and Senese, Vincenzo Paolo and Pisano, Simone and Siciliano, Margherita and Russo, Katia and Muratori, Pietro and Marotta, Rosa and Pascotto, Antonio and Broome, Matthew R.	drop
337	786020532	6 - Online social marketing approaches to inform cyber/bullying prevention and intervention: What have we learnt?	2018	Reducing Cyberbullying in Schools	Spears, Barbara A. and Taddeo, Carmel and Barnes, Alan and Campbell, Marilyn and Bauman, Sheri	retrieved
338	786020533	The GLID method: Moving from design features to underlying values in co-design	2017	International Journal of Human-Computer Studies	Van Mechelen, Maarten and Derboven, Jan and Laenen, Ann and Willems, Bert and Geerts, David and Vanden Abeele, Vero	drop
339	786020534	The diabetes online community: Older adults supporting self-care through peer health	2018	Patient Education and Counseling	Litchman, Michelle L. and Rothwell, Erin and Edelman, Linda S.	drop
340	786020535	Childrenâ€™s conceptions of mental well-being and ideas for its promotion through digital environments	2021	International Journal of Child-Computer Interaction	Kankaanranta, Marja and MehtÃ¤lÃ¤, Saana and Hankala, Mari and Merjovaara, Olli and Rousi, Rebekah	drop
341	786020536	Factors associated with distressing electronic harassment and cyberbullying	2013	Computers in Human Behavior	Fenaughty, John and HarrÃ©, Niki	drop
342	786020537	Brief report: Cyberbullying perpetration and its associations with socio-demographics, aggressive behaviour at school, and mental health outcomes	2014	Journal of Adolescence	Fletcher, Adam and Fitzgerald-Yau, Natasha and Jones, Rebecca and Allen, Elizabeth and Viner, Russell M. and Bonell, Chris	drop
343	786020538	Youth engaging in online harassment: associations with caregiverâ€“child relationships, Internet use, and personal characteristics	2004	Journal of Adolescence	Ybarra, Michele L and Mitchell, Kimberly J	drop
344	786020539	Predictors of cyberbullying perpetration among college students: An application of the Theory of Reasoned Action	2014	Computers in Human Behavior	Doane, Ashley N. and Pearson, Matthew R. and Kelley, Michelle L.	drop
345	786020540	Romantic motivations for social media use, social comparison, and online aggression among adolescents	2017	Computers in Human Behavior	Young, Rachel and Len-RÃ­os, MarÃ­a and Young, Henry	drop
346	786020541	Stop bugging me: An examination of adolescentsâ€™ protection behavior against online harassment	2012	Journal of Adolescence	Lwin, May O. and Li, Benjamin and Ang, Rebecca P.	drop
347	786020542	Prevalence and Frequency of Internet Harassment Instigation: Implications for Adolescent Health	2007	Journal of Adolescent Health	Ybarra, Michele L. and Mitchell, Kimberly J.	drop
348	786020543	Connections between online harassment and offline violence among youth in Central Thailand	2015	Child Abuse & Neglect	Ojanen, Timo Tapani and Boonmongkon, Pimpawun and Samakkeekarom, Ronnapoom and Samoh, Nattharat and Cholratana, Mudjalin and Guadamuz, Thomas Ebanan	drop
349	786020544	Moving toward a theory: Testing an integrated model of cyberbullying perpetration, aggression, social skills, and Internet self-efficacy	2017	Computers in Human Behavior	Savage, Matthew W. and Tokunaga, Robert S.	drop
350	786020545	Longitudinal predictors of cyberbullying perpetration: Evidence from Korean middle school students	2016	Personality and Individual Differences	You, Sukkyung and Lim, Sun Ah	drop
351	786020546	A suspect-oriented intelligent and automated computer forensic analysis	2016	Digital Investigation	Al Fahdi, M. and Clarke, N.L. and Li, F. and Furnell, S.M.	drop
352	786020547	Unraveling the underlying factors SCulPT-ing cyberbullying behaviours among Malaysian young adults	2017	Computers in Human Behavior	Balakrishnan, Vimala	drop
353	786020548	Cyberbullying and self-esteem: An Italian study	2017	Computers in Human Behavior	Palermiti, Anna Lisa and Servidio, Rocco and Bartolo, Maria Giuseppina and Costabile, Angela	drop
354	786020549	Social media as a vector for youth violence: A review of the literature	2014	Computers in Human Behavior	Patton, Desmond Upton and Hong, Jun Sung and Ranney, Megan and Patel, Sadiq and Kelley, Caitlin and Eschmann, Rob and Washington, Tyreasa	drop
355	786020550	Following you home from school: A critical review and synthesis of research on cyberbullying victimization	2010	Computers in Human Behavior	Tokunaga, Robert S.	drop
356	786020551	Modeling of agent-based complex network under cyber-violence	2016	Physica A: Statistical Mechanics and its Applications	Huang, Chuanchao and Hu, Bin and Jiang, Guoyin and Yang, Ruixian	drop
357	786020552	Informing aggressionâ€“prevention efforts by comparing perpetrators of brief vs. extended cyber aggression	2013	Computers in Human Behavior	France, Kenneth and Danesh, Azim and Jirard, Stephanie	drop
358	786020553	Individual and class justification of cyberbullying and cyberbullying perpetration: A longitudinal analysis among adolescents	2016	Journal of Applied Developmental Psychology	GÃ¡mez-Guadix, Manuel and Gini, Gianluca	drop
359	786020554	Examining the Overlap in Internet Harassment and School Bullying: Implications for School Intervention	2007	Youth Violence and Electronic Media: Similar Behaviors, Different Venues?	Ybarra, Michele L. and Diener-West, Marie and Leaf, Philip J.	drop
360	786020555	Trends in Youth Internet Victimization: Findings From Three Youth Internet Safety Surveys 2000â€“2010	2012	Journal of Adolescent Health	Jones, Lisa M. and Mitchell, Kimberly J. and Finkelhor, David	drop
361	786020556	Parental mediation, peer norms and risky online behavior among adolescents	2014	Computers in Human Behavior	Sasson, Hagit and Mesch, Gustavo	drop
362	786020557	Face-to-face bullying and cyberbullying in adolescents: Trans-contextual effects and role overlap	2017	Technology in Society	Lazuras, Lambros and Barkoukis, Vassilis and Tsorbatzoudis, Haralambos	drop
363	786020558	Comparing cyberbullying perpetration on social media between primary and secondary school students	2017	Computers & Education	Ho, Shirley S. and Chen, Liang and Ng, Angelica P.Y.	drop
364	786020559	The Co-occurrence of Internet Harassment and Unwanted Sexual Solicitation Victimization and Perpetration: Associations with Psychosocial Indicators	2007	Youth Violence and Electronic Media: Similar Behaviors, Different Venues?	Ybarra, Michele L. and Espelage, Dorothy L. and Mitchell, Kimberly J.	drop
365	786020560	Cyberbullying perpetration and victimization among adolescents in Hong Kong	2014	Children and Youth Services Review	Wong, Dennis S.W. and Chan, Heng Choon (Oliver) and Cheng, Christopher H.K.	drop
366	786020561	Prevalence of cyberbullying and predictors of cyberbullying perpetration among Korean adolescents	2017	Computers in Human Behavior	Lee, Changho and Shin, Namin	drop
367	786020562	Online Communication Among Adolescents: An Integrated Model of Its Attraction, Opportunities, and Risks	2011	Journal of Adolescent Health	Valkenburg, Patti M. and Peter, Jochen	drop
368	786020563	Electronic Media, Violence, and Adolescents: An Emerging Public Health Problem	2007	Youth Violence and Electronic Media: Similar Behaviors, Different Venues?	David-Ferdon, Corinne and Hertz, Marci Feldman	drop
369	786020564	To control or not to control? Parenting behaviours and adolescent online aggression	2010	Online Interactivity: Role of Technology in Behavior Change	Law, Danielle M. and Shapka, Jennifer D. and Olson, Brent F.	drop
370	786020565	Stability of cyberbullying victimization among adolescents: Prevalence and association with bullyâ€“victim status and psychosocial adjustment	2015	Computers in Human Behavior	GÃ¡mez-Guadix, Manuel and Gini, Gianluca and Calvete, Esther	drop
371	786020566	Longitudinal Predictors of Cyber and Traditional Bullying Perpetration in Australian Secondary School Students	2012	Journal of Adolescent Health	Hemphill, Sheryl A. and Kotevski, Aneta and Tollit, Michelle and Smith, Rachel and Herrenkohl, Todd I. and Toumbourou, John W. and Catalano, Richard F.	drop
372	786020567	Multiple online victimization of Spanish adolescents: Results from a community sample	2016	Child Abuse & Neglect	Montiel, Irene and Carbonell, Enrique and Pereda, NoemÃ­	drop
373	786020568	From theory to practice: Cyberbullying theory and its application to intervention	2017	Computers in Human Behavior	Barlett, Christopher P.	drop
374	786020569	Relationship between stressful life events and cyberbullying perpetration: Roles of fatalism and self-compassion	2021	Child Abuse & Neglect	Geng, Jingyu and Lei, Li	drop
375	786020570	Social and Emotional Competencies in Adolescents Involved in Different Bullying and Cyberbullying Roles	2018	Revista de PsicodidÃ¡ctica (English ed.)	Zych, Izabela and BeltrÃ¡n-CatalÃ¡n, MarÃ­a and Ortega-Ruiz, Rosario and Llorent, Vicente J.	drop
376	786020571	Longitudinal associations among neuroticism, depression, and cyberbullying in early adolescents	2020	Computers in Human Behavior	Zhang, Danfeng and Huebner, E. Scott and Tian, Lili	drop
377	786020572	The influence of participant role, gender, and age in elementary and high-school children's moral justifications of cyberbullying behaviors	2018	Computers in Human Behavior	Leduc, Karissa and Conway, Lauryn and Gomez-Garibello, Carlos and Talwar, Victoria	drop
378	786020573	Misogyny Detection in Twitter: a Multilingual and Cross-Domain Study	2020	Information Processing & Management	Pamungkas, Endang Wahyu and Basile, Valerio and Patti, Viviana	drop
379	786020574	Effects of a formative assessment-based contextual gaming approach on studentsâ€™ digital citizenship behaviours, learning motivations, and perceptions	2020	Computers & Education	Tapingkae, Preeyada and Panjaburee, Patcharin and Hwang, Gwo-Jen and Srisawasdi, Niwat	retrieved
380	786020575	Neuroticism and cyberbullying among elementary school students: A latent growth curve modeling approach	2021	Personality and Individual Differences	Zhang, Danfeng and Huebner, E. Scott and Tian, Lili	drop
381	786020576	Fun over conscience: Fun-seeking tendencies in cyberbullying perpetration	2018	Computers in Human Behavior	Wong, Natalie and McBride, Catherine	drop
382	786020577	School bullying victimization and perpetration among Chinese adolescents: A latent class approach	2021	Children and Youth Services Review	Hu, Ran and Xue, Jia and Han, Ziqiang	drop
383	786020578	Adolescent Reactive and Proactive Aggression, and Bullying in Hong Kong: Prevalence, Psychosocial Correlates, and Prevention	2019	Mental Health and Well-Being of Adolescents in Hong Kong	Fung, Annis Lai Chu	drop
384	786020579	Cyberbullying perpetration among Chinese adolescents: The role of interparental conflict, moral disengagement, and moral identity	2018	Children and Youth Services Review	Yang, Xiaohui and Wang, Zhenhong and Chen, Huan and Liu, Danni	drop
385	786020580	How the human is the catalyst: Personality, aggressive fantasy, and proactive-reactive aggression among users of social media	2018	Examining Personality and Individual Differences in Cyberspace	McCreery, Michael P. and Kathleen Krach, S.	drop
386	786020581	The effects of anonymity, invisibility, asynchrony, and moral disengagement on cyberbullying perpetration among school-aged children in China	2020	Children and Youth Services Review	Wang, Lin and Ngai, Steven Sek-yum	drop
387	786020582	Spreading dynamics of a cyber violence model on scale-free networks	2019	Physica A: Statistical Mechanics and its Applications	Liu, Wenjin and Li, Tao and Cheng, Xinming and Xu, Hao and Liu, Xiongding	drop
388	786020583	Online sexual harassment and depression in Chilean adolescents: Variations based on gender and age of the offenders	2021	Child Abuse & Neglect	Guerra, CristÃ³bal and Pinto-Cortez, CristiÃ¡n and Toro, Edgardo and Efthymiadou, Erifili and Quayle, Ethel	drop
389	786020584	Social contagion of cyberbullying via online perpetrator and victim networks	2021	Computers in Human Behavior	Yokotani, Kenji and Takano, Masanori	drop
390	786020585	Cyberbullying through the lens of social influence: Predicting cyberbullying perpetration from perceived peer-norm, cyberspace regulations and ingroup processes	2020	Computers in Human Behavior	Piccoli, Valentina and Carnaghi, Andrea and Grassi, Michele and StragÃ , Marta and Bianchi, Mauro	drop
391	786020586	Deviant peer affiliation and adolescentsâ€™ cyberbullying perpetration: Online disinhibition and perceived social support as moderators	2021	Children and Youth Services Review	Yang, Jiping and Wang, Na and Gao, Ling and Wang, Xingchao	drop
392	786020587	Online sexist meme and its effects on moral and emotional processes in social media	2021	Computers in Human Behavior	Paciello, Marinella and D'Errico, Francesca and Saleri, Giorgia and Lamponi, Ernestina	drop
393	786020588	Smartphone addiction and victimization predicts sleep problems and depression among children	2022	Journal of Pediatric Nursing	Chang, Fong-Ching and Chiu, Chiung-Hui and Chen, Ping-Hung and Chiang, Jeng-Tung and Miao, Nae-Fang and Chuang, Hung-Yi and Huang, Wei-Quan and Tseng, Chie-Chien	drop
394	786020589	Examining how online risk exposure and online social capital influence adolescent psychological stress	2020	Computers in Human Behavior	Maghsoudi, Rose and Shapka, Jennifer and Wisniewski, Pamela	drop
395	786020590	Gender-specific pathways regarding the outcomes of a cyberbullying youth education program	2022	Personality and Individual Differences	KapitÃ¡ny-FÃ¶vÃ©ny, MÃ¡tÃ© and LukÃ¡cs, J. Ãgnes and TakÃ¡cs, Johanna and Kitzinger, IstvÃ¡n and SoÃ³snÃ© Kiss, Zsuzsanna and SzabÃ³, GÃ¡bor and Falus, AndrÃ¡s and Feith, Helga Judit	retrieved
396	786020591	Cyberbullying in Hong Kong Chinese students: Life satisfaction, and the moderating role of friendship qualities on cyberbullying victimization and perpetration	2018	Examining Personality and Individual Differences in Cyberspace	Leung, Angel Nga Man and Wong, Natalie and Farver, JoAnn M.	drop
397	786020592	Online celebrity aggression: A combination of low empathy and high moral disengagement? The relationship between empathy and moral disengagement and adolescents' online celebrity aggression	2018	Computers in Human Behavior	Ouvrein, GaÃ«lle and De Backer, Charlotte J.S. and Vandebosch, Heidi	drop
398	786020593	Examining the impacts of low self-control and online lifestyles on cyberbullying perpetration among Korean adolescents: Using parallel process latent growth curve modeling	2020	Children and Youth Services Review	Cho, Sujung and Rustu, Deryol	drop
399	786020594	Moral disengagement and adolescentsâ€™ cyberbullying perpetration: Student-student relationship and gender as moderators	2020	Children and Youth Services Review	Gao, Ling and Liu, Jiedi and Wang, Wei and Yang, Jiping and Wang, Pengcheng and Wang, Xingchao	drop
400	786020595	Family incivility and cyberbullying in adolescence: A moderated mediation model	2020	Computers in Human Behavior	Bai, Qiyu and Bai, Shiguo and Huang, Yuyan and Hsueh, Fang-Hsuan and Wang, Pengcheng	drop
401	786020596	Does victimization predict cyberbullying perpetration? Examining depression as a mediator and self-control as a moderator	2021	Personality and Individual Differences	Wang, Lin and Ge, Ting	drop
402	786020597	Does gender matter in cyberbullying perpetration? An empirical investigation	2018	Computers in Human Behavior	Wong, Randy Y.M. and Cheung, Christy M.K. and Xiao, Bo	drop
403	786020598	The associations between cyberbullying and callous-unemotional traits among adolescents: The moderating effect of online disinhibition	2019	Personality pathologies in the world: beyond dichotomies	Wright, Michelle F. and Harper, Bridgette D. and Wachs, Sebastian	drop
404	786020599	Measuring network rationality and simulating information diffusion based on network structure	2021	Physica A: Statistical Mechanics and its Applications	Gong, Hao and Guo, Chunxiang and Liu, Yu	drop
405	786020600	Children's risk and benefit behaviours on social networking sites	2022	Computers in Human Behavior	Hayes, B. and James, A. and Barn, R. and Watling, D.	drop
406	786020601	Individual factors predicting reactions to online harassment among Finnish professionals	2022	Computers in Human Behavior	Celuch, Magdalena and Savela, Nina and Oksa, Reetta and Latikka, Rita and Oksanen, Atte	drop
407	786020602	Cyberbullying involvement and short sleep duration among adolescents	2022	Sleep Health	Sampasa-Kanyinga, Hugues and Lien, Amanda and Hamilton, Hayley A. and Chaput, Jean-Philippe	drop
408	786020603	Indirect cyber violence and general strain theory: Findings from the 2018 Korean youth survey	2021	Children and Youth Services Review	Cho, Yeokil and DioGuardi, Sherri and Nickell, Tammy and Lee, Wanhee	drop
409	786020604	Social Media Use and Adolescent Mental Health: Findings From the UK Millennium Cohort Study	2018	EClinicalMedicine	Kelly, Yvonne and Zilanawala, Afshin and Booker, Cara and Sacker, Amanda	drop
410	786020605	Revisiting cyberbullying: Perspectives from Taiwanese teachers	2013	Computers & Education	Huang, Yun-yin and Chou, Chien	drop
411	786020606	Cyberbullying myths and realities	2013	Computers in Human Behavior	Sabella, Russell A. and Patchin, Justin W. and Hinduja, Sameer	drop
412	786020607	The association between school exclusion, delinquency and subtypes of cyber- and F2F-victimizations: Identifying and predicting risk profiles and subtypes using latent class analysis	2015	Child Abuse & Neglect	Barboza, Gia Elise	drop
413	786020608	Quetiapine modulates functional connectivity in brain aggression networks	2013	NeuroImage	Klasen, Martin and Zvyagintsev, Mikhail and Schwenzer, Michael and Mathiak, Krystyna A. and Sarkheil, Pegah and Weber, RenÃ© and Mathiak, Klaus	drop
414	786020609	Cyberbullying and subjective health: A large-scale study of students in Stockholm, Sweden	2013	Children and Youth Services Review	LÃ¥ftman, Sara Brolin and Modin, Bitte and Ã–stberg, Viveca	drop
415	786020610	Cyberspace as a generator of changes in the aggressive-victim role	2014	Computers in Human Behavior	Cuadrado-Gordillo, Isabel and FernÃ¡ndez-Antelo, Inmaculada	drop
416	786020611	Cyberbullying: Eliciting harm without consequence	2013	Computers in Human Behavior	Pettalia, Jennifer L. and Levin, Elizabeth and Dickinson, JoÃ«l	drop
417	786020612	Discrepant gender patterns for cyberbullying and traditional bullying â€“ An analysis of Swedish adolescent data	2013	Computers in Human Behavior	Beckman, Linda and Hagquist, Curt and HellstrÃ¶m, Lisa	drop
418	786020613	School bullying, cyberbullying, or both: Correlates of teen suicidality in the 2011 CDC youth risk behavior survey	2014	Comprehensive Psychiatry	Messias, Erick and Kindrick, Kristi and Castro, Juan	drop
419	786020614	Does cyberbullying overlap with school bullying when taking modality of involvement into account?	2015	Computers in Human Behavior	Kubiszewski, Violaine and Fontaine, Roger and Potard, Catherine and Auzoult, Laurent	drop
420	786020615	School Violence and Attitude Toward Authority of Students Perpetrators of Cyberbullying	2017	Revista de PsicodidÃ¡ctica (English ed.)	Ortega-BarÃ³n, Jessica and Buelga, SofÃ­a and Cava, MarÃ­a-JesÃºs and Torralba, Eva	drop
421	786020616	Who's to blame?: The effects of victim disclosure on bystander reactions to cyberbullying	2016	Computers in Human Behavior	Schacter, Hannah L. and Greenberg, Shayna and Juvonen, Jaana	drop
422	786020617	Cybervictimization and suicidality among French undergraduate Students: A mediation model	2019	Journal of Affective Disorders	CÃ©nat, Jude Mary and Smith, Kevin and HÃ©bert, Martine and Derivois, Daniel	drop
423	786020618	The psychosocial impacts of cybervictimisation and barriers to seeking social support: Young peopleâ€™s perspectives	2020	Children and Youth Services Review	Dennehy, Rebecca and Meaney, Sarah and Cronin, Mary and Arensman, Ella	drop
424	786020619	Reactions to cyberbullying among high school and university students	2019	The Social Science Journal	EriÅŸti, BahadÄ±r and Akbulut, Yavuz	drop
425	786020620	The Effects of Self-Efficacy and Locus of Control on Cyberbully/Victim Status in Adolescents	2021	Journal of Pediatric Nursing	Ã–zdemir, Emine Zahide and BektaÅŸ, Murat	drop
426	786020621	Relationship between cyberbullying roles, cortisol secretion and psychological stress	2017	Computers in Human Behavior	GonzÃ¡lez-Cabrera, J. and Calvete, E. and LeÃ³n-MejÃ­a, A. and PÃ©rez-Sancho, C. and Peinado, J.M.	drop
427	786020622	Online sexual exposure, cyberbullying victimization and suicidal ideation among Hong Kong adolescents: Moderating effects of gender and sexual orientation	2021	Psychiatry Research Communications	Chang, Qingsong and Xing, Jianli and Chang, Renjie and Ip, Patrick and Yee-Tak Fong, Daniel and Fan, Susan and Ho, Rainbow T.H. and Yip, Paul S.F.	drop
428	786020623	The personality profile of a cyberbully: Examining the Dark Triad	2015	Computers in Human Behavior	Goodboy, Alan K. and Martin, Matthew M.	drop
429	786020624	Unresponsive or un-noticed?: Cyberbystander intervention in an experimental cyberbullying context	2015	Computers in Human Behavior	Dillon, Kelly P. and Bushman, Brad J.	drop
430	786020625	Parental supervision and victims of cyberbullying: Influence of the use of social networks and online extimacy	2021	Revista de PsicodidÃ¡ctica (English ed.)	Martin-Criado, JosÃ©-MarÃ­a and Casas, JosÃ©-Antonio and Ortega-Ruiz, Rosario and Del Rey, Rosario	drop
431	786020626	How do victims react to cyberbullying on social networking sites? The influence of previous cyberbullying victimization experiences	2015	Computers in Human Behavior	Cao, Bolin and Lin, Wan-Ying	drop
432	786020627	CyberAid: Are your children safe from cyberbullying?	2021	Journal of King Saud University - Computer and Information Sciences	Thun, Lee Jia and Teh, Phoey Lee and Cheng, Chi-Bin	drop
433	786020628	Can emotion regulation serve as a tool in combating cyberbullying?	2016	Personality and Individual Differences	den Hamer, A.H. and Konijn, E.A.	drop
434	786020629	Forgiveness and cyberbullying in adolescence: Does willingness to forgive help minimize the risk of becoming a cyberbully?	2018	Computers in Human Behavior	Quintana-Orts, Cirenia and Rey, Lourdes	drop
435	786020630	Ethnic differences in experiences of school bullying in China	2019	Children and Youth Services Review	Ba, Zhanlong and Han, Ziqiang and Gong, Zepeng and Li, Fan and Zhang, Haibo and Zhang, Guirong	drop
436	786020631	Longitudinal Associations Between Cyberbullying Involvement and Adolescent Mental Health	2016	Journal of Adolescent Health	Fahy, Amanda E. and Stansfeld, Stephen A. and Smuk, Melanie and Smith, Neil R. and Cummins, Steven and Clark, Charlotte	drop
437	786020632	Personality traits and self-esteem in traditional bullying and cyberbullying	2021	Personality and Individual Differences	Pascual-Sanchez, Ana and Hickey, Nicole and Mateu, Ainoa and Martinez-Herves, Maria and Kramer, Tami and Nicholls, Dasha	drop
438	786020633	Adolescent cybervictimization â€“ Who they turn to and their perceived school climate	2017	Journal of Adolescence	Veiga SimÃ£o, A.M. and Ferreira, P. Costa and Freire, I. and Caetano, A.P. and Martins, M.J. and Vieira, C.	drop
439	786020634	Perpetrators on the internet: Analyzing individual and structural explanation factors of cyberbullying in school context	2016	Computers in Human Behavior	Festl, Ruth	drop
440	786020635	Identification of key cyberbullies: A text mining and social network analysis approach	2021	Telematics and Informatics	Choi, Yoon-Jin and Jeon, Byeong-Jin and Kim, Hee-Woong	drop
441	786020636	The emergence of cyberbullying in childhood: Parent and teacher perspectives	2016	La ciberconducta y la psicologÃ­a educativa: retos y riesgos [Cyberbehavior and educational psychology: challenges and risks]	Monks, Claire P. and Mahdavi, Jess and Rix, Katie	drop
442	786020637	Elucidating the neurobiology of cyberbullying using functional Magnetic Resonance Imaging (fMRI): A hypothesis	2020	Aggression and Violent Behavior	McLoughlin, Larisa T. and Shan, Zack and Broadhouse, Kathryn M. and Lagopoulos, Jim and Winks, Natalie and Hermens, Daniel F.	drop
443	786020638	Cyber-harassment victimization in Portugal: Prevalence, fear and help-seeking among adolescents	2016	Computers in Human Behavior	Pereira, Filipa and Spitzberg, Brian H. and Matos, Marlene	drop
444	786020639	Sensation seeking and cyberbullying among Chinese adolescents: Examining the mediating roles of boredom experience and antisocial media exposure	2022	Computers in Human Behavior	Zhang, Xue-Chen and Chu, Xiao-Wei and Fan, Cui-Ying and Andrasik, Frank and Shi, Hui-Fen and Hu, Xiang-En	drop
445	786020640	Social media addiction, cyberbullying and cyber victimization of university students	2021	Archives of Psychiatric Nursing	Ã‡imke, Sevim and Cerit, Esin	drop
446	786020641	Do Australian parents of young children understand what bullying means?	2020	Children and Youth Services Review	Ey, L. and Campbell, M.	drop
447	786020642	Cyberbullying and cybervictimization versus parental supervision, monitoring and control of adolescents' online activities	2019	Children and Youth Services Review	Baldry, Anna Costanza and Sorrentino, Anna and Farrington, David P.	drop
448	786020643	Relationship between suicidal thinking, anxiety, depression and stress in university students who are victims of cyberbullying	2020	Psychiatry Research	MartÃ­nez-Monteagudo, MarÃ­a Carmen and Delgado, Beatriz and DÃ­az-Herrero, Ãngela and GarcÃ­a-FernÃ¡ndez, JosÃ© Manuel	drop
449	786020644	Empowering digital citizenship: An anti-cyberbullying intervention to increase children's intentions to intervene on behalf of the victim	2020	Computers in Human Behavior	Vlaanderen, Anne and Bevelander, Kirsten E. and Kleemans, Mariska	retrieved
450	786020645	The emotional impact of cyberbullying: Differences in perceptions and experiences as a function of role	2015	Computers & Education	GimÃ©nez Gualdo, Ana M. and Hunter, Simon C. and Durkin, Kevin and Arnaiz, Pilar and MaquilÃ³n, Javier J.	drop
451	786020646	Is cyberbullying a group process? Online and offline bystanders of cyberbullying act as defenders, reinforcers and outsiders	2019	Computers in Human Behavior	Sarmiento, Alejandra and Herrera-LÃ³pez, Mauricio and Zych, Izabela	drop
452	786020647	Cybervictimization and well-being among adolescents during the COVID-19 pandemic: The mediating roles of emotional self-efficacy and emotion regulation	2022	Computers in Human Behavior	Schunk, Fabian and Zeh, Franziska and Trommsdorff, Gisela	drop
453	786020648	Cyberbullying among young adults in Malaysia: The roles of gender, age and Internet frequency	2015	Computers in Human Behavior	Balakrishnan, Vimala	drop
454	786020649	Exploring the association between social support and patterns of bullying victimization among school-aged adolescents	2022	Children and Youth Services Review	Lee, Jungup and Roh, Beop-Rae and Yang, Kyung-Eun	drop
455	786020650	From improper to acceptable: How perpetrators neutralize workplace bullying behaviors in the cyber world	2018	Information & Management	Zhang, Sixuan and Leidner, Dorothy	drop
456	786020651	Social advantages and disadvantages associated with cyber aggression-victimization: A latent class analysis	2020	Computers in Human Behavior	Lapierre, Kiana R. and Dane, Andrew V.	drop
457	786020652	Empathy online and moral disengagement through technology as longitudinal predictors of cyberbullying victimization and perpetration	2020	Children and Youth Services Review	MarÃ­n-LÃ³pez, Inmaculada and Zych, Izabela and Ortega-Ruiz, Rosario and Monks, Claire P. and Llorent, Vicente J.	drop
458	786020653	Cyberbullying at work: The mediating role of optimism between cyberbullying and job outcomes	2015	Computers in Human Behavior	Snyman, Robyn and Loh, Jennifer (M.I.)	drop
459	786020654	The Overlap Between Cyberbullying and Traditional Bullying	2015	Journal of Adolescent Health	Waasdorp, Tracy E. and Bradshaw, Catherine P.	drop
460	786020655	Bullying and suicide risk among sexual minority youth in the United States	2021	Preventive Medicine	Smith, Ariel U. and Reidy, Dennis	drop
461	786020656	School Bullying Among Vocational School Students in China: Prevalence and Associations With Personal, Relational, and School Factors	2022	Journal of Interpersonal Violence	Xu, S. and Ren, J. and Li, F. and Wang, L. and Wang, S.	drop
462	786020657	Feasibility of a Web-Accessible Game-Based Intervention Aimed at Improving Help Seeking and Coping Among Sexual and Gender Minority Youth: Results From a Randomized Controlled Trial	2021	Journal of Adolescent Health	Egan, J.E. and Corey, S.L. and Henderson, E.R. and Abebe, K.Z. and Louth-Marquez, W. and Espelage, D. and Hunter, S.C. and DeLucas, M. and Miller, E. and Morrill, B.A. and Hieftje, K. and Sang, J.M. and Friedman, M.S. and Coulter, R.W.S.	retrieved
463	786020658	Role-based cyberbullying situations: Cybervictims, cyberaggressors and cyberbystanders	2021	International Journal of Environmental Research and Public Health	GonzÃ¡lez-Calatayud, V. and Prendes Espinosa, M.P.	drop
464	786020659	Standing up or standing by: Bystander intervention in cyberbullying on social media	2021	New Media and Society	Wang, S.	drop
465	786020660	Efficacy of a Web-Enabled, School-Based, Preventative Intervention to Reduce Bullying and Improve Mental Health in Children and Adolescents: Study Protocol for a Cluster Randomized Controlled Trial	2021	Frontiers in Pediatrics	DÃ­az-Caneja, C.M. and MartÃ­n-Babarro, J. and AbregÃº-Crespo, R. and Huete-Diego, M.Ã. and GimÃ©nez-DasÃ­, M. and Serrano-MarugÃ¡n, I. and Arango, C.	drop
466	786020661	The Effectiveness of Safe Surfing Intervention Program in Reducing WhatsApp Cyberbullying and Improving Classroom Climate and Student Sense of Class Belonging in Elementary School	2021	Journal of Early Adolescence	Aizenkot, D. and Kashy-Rosenbaum, G.	retrieved
467	786020662	Emotional characteristics of sportsman students engaged in bullying and cyberbullying in relation to migrant students	2021	Journal of Human Sport and Exercise	Garifullin, R.R.	drop
468	786020663	Preconditions for guardianship interventions in cyberbullying: Incident interpretation, collective and automated efficacy, and relative popularity of bullies	2020	Computers in Human Behavior	Ireland, L. and Hawdon, J. and Huang, B. and Peguero, A.	drop
469	786020664	School-based, two-arm, parallel, controlled trial of a culturally adapted resilience intervention to improve adolescent mental health in Vietnam: Study protocol	2020	BMJ Open	Tran, T. and Nguyen, H.T. and Shochet, I. and Wurfl, A. and Orr, J. and Nguyen, N. and La, N. and Nguyen, H. and Stocker, R. and Nguyen, T. and Le, M. and Fisher, J.	drop
470	786020665	Development of a Violence Prevention Educational Program for Elementary School Children Using Empathy (VPEP-E)	2020	Child Health Nursing Research	Kang, S.R. and Kim, S.-J. and Lee, J.	retrieved
471	786020666	A Pilot Study of an Online Psychoeducational Program on Cyberbullying That Aims to Increase Confidence and Help-Seeking Behaviors among Adolescents	2020	Cyberpsychology, Behavior, and Social Networking	Chillemi, K. and Abbott, J.-A.M. and Austin, D.W. and Knowles, A.	retrieved
472	786020667	Intranasal Oxytocin Administration Reduces Bystandersâ€™ Acceptance of Online Celebrity Bashing	2020	International Journal of Bullying Prevention	Rudnicki, K. and Ouvrein, G. and De Backer, C. and Heidi, V.	drop
473	786020668	Loving Your Parents and Treating Others Well: The Effect of Filial Piety on Cyberbullying Perpetration and Its Functional Mechanism Among Chinese Graduate Students	2020	Journal of Interpersonal Violence	Wei, H. and Liu, M.	drop
474	786020669	Effectiveness of solution-focused brief counseling to reduce online aggression of student	2020	Universal Journal of Educational Research	Wiretna, C.D. and Saputra, W.N.E. and Muarifah, A. and Barida, M.	retrieved
475	786020670	The friendly schools initiative: Evidence-based bullying prevention in Australian schools	2019	Making an Impact on School Bullying: Interventions and Recommendations	Barnes, A. and Pearce, N. and Erceg, E. and Runions, K. and Cardoso, P. and Lester, L. and Coffin, J. and Cross, D.	retrieved
476	786020671	Impact of the Friendly Schools whole-school intervention on transition to secondary school and adolescent bullying behaviour	2018	European Journal of Education	Cross, D. and Shaw, T. and Epstein, M. and Pearce, N. and Barnes, A. and Burns, S. and Waters, S. and Lester, L. and Runions, K.	retrieved
477	786020672	"EspaiJove.net"- A school-based intervention programme to promote mental health and eradicate stigma in the adolescent population: study protocol for a cluster randomised controlled trial	2018	BMC Public Health	CasaÃ±as, R. and Arfuch, V.-M. and CastellvÃ­, P. and Gil, J.-J. and Torres, M. and Pujol, A. and Castells, G. and TeixidÃ³, M. and San-Emeterio, M.T. and Sampietro, H.M. and Caussa, A. and Alonso, J. and Lalucat-Jo, L.	drop
478	786020673	Technological resources to prevent cyberbullying during adolescence: The Cyberprogram 2.0 program and the cooperative Cybereduca 2.0 Videogame	2018	Frontiers in Psychology	Garaigordobil, M. and MartÃ­nez-Valderrey, V.	drop
479	786020674	The Effects of Thought Suppression on Ethical Decision Making: Mental Rebound Versus Ego Depletion	2018	Journal of Business Ethics	Yam, K.C.	drop
480	786020675	Cyber-Friendly Schools. Final report to Healthway.	2018	Reducing Cyberbullying in Schools: International Evidence-Based Best Practices	Cross, D. and Barnes, A. and Cardoso, P. and Hadwen, K. and Shaw, T. and Campbell, M. and Slee, P.T.	retrieved
481	786020676	Stop Online Bullies: The advantages and disadvantages of a standalone intervention	2018	Reducing Cyberbullying in Schools: International Evidence-Based Best Practices	Dehue, F. and VÃ¶llink, T. and Gunther, N. and Jacobs, N.	retrieved
482	786020677	Impact of cyberprogram 2.0 on different types of school violence and aggressiveness	2016	Frontiers in Psychology	Garaigordobil, M. and MartÃ­nez-Valderrey, V.	retrieved
483	786020678	Effects of Cyberprogram 2.0 on â€œface-to-faceâ€ bullying, cyberbullying, and empathy	2015	Psicothema	Garaigordobil, M. and MartÃ­nez-Valderrey, V.	drop
484	786020679	Changing the student experience of cyber bullying through a cyber safety program	2013	From Cyber Bullying to Cyber Safety: Issues and Approaches in Educational Contexts	Hanewald, R.	drop
485	786020680	Knowing, building and living together on internet and social networks: The ConRed cyberbullying prevention program	2012	International Journal of Conflict and Violence	Ortega-Ruiz, R. and Del Rey, R. and Casas, J.A.	retrieved
486	786020681	Online and offline peer led models against bullying and cyberbullying	2012	Psicothema	Palladino, B.E. and Nocentini, A. and Menesini, E.	retrieved
487	786020682	Re-Visiting the Australian Media Arts Curriculum for Digital Media Literacy Education	2021	Australian Educational Researcher	Dezuanni, Michael	drop
488	786020683	Factors Affecting Students' Intentions to Undertake Online Learning: An Empirical Study in Vietnam	2021	Education and Information Technologies	Maheshwari, Greeni	drop
489	786020684	Positive Perceived School Climate and Cyberbullying in Chinese Adolescents: A Moderated Mediation Model from the Perspective of Internet Characteristics	2021	Journal of Early Adolescence	Shi, Hui-fen and Fan, Cui-ying and Chu, Xiao-wei and Zhang, Xue-chen and Wu, Ling-ling	drop
490	786020685	The Influence of Sex and Culture on the Longitudinal Associations of Peer Attachment, Social Preference Goals, and Adolescents' Cyberbullying Involvement: An Ecological Perspective	2021	School Mental Health	Wright, Michelle F. and Schiamberg, Lawrence B. and Wachs, Sebastian and Huang, Zheng and Kamble, Shanmukh V. and Soudi, Shruti and Bayraktar, Fatih and Li, Zheng and Lei, Li and Shu, Chang	drop
491	786020686	Developing a Parenting Program for Young Couples	2021	Journal of Education and Learning (EduLearn)	Hidayah, Nurul and Fakhruddiana, Fuadah and Maharani, Ega Asnatasia	drop
492	786020687	The Effect of Instant Message on Chinese Character Handwriting among Teens: "Pinyin" Input Experience as a Compensating Role	2021	Asia-Pacific Education Researcher	Chen, Jingjun and Xia, Yuan and Wan, Liyan and Luo, Rong	drop
493	786020688	Source Trust and COVID-19 Information Sharing: The Mediating Roles of Emotions and Beliefs about Sharing	2021	Health Education & Behavior	Lu, Linqi and Liu, Jiawei and Yuan, Y. Connie and Burns, Kelli S. and Lu, Enze and Li, Dongxiao	drop
494	786020689	Problematizing Enterprise Culture in Global Academic Publishing: Linguistic Entrepreneurship through the Lens of Two Chinese Visiting Scholars in a U.S. University	2021	Multilingua: Journal of Cross-Cultural and Interlanguage Communication	Li, Wendy and De Costa, Peter I.	drop
495	786020690	Dark Triad and Social Media Addiction among Undergraduates: Coping Strategy as a Mediator	2021	Contemporary Educational Technology	Siah, Poh Chua and Hue, Jie Yeng and Wong, Bernie Zi Ru and Goh, Sin Jie	drop
496	786020691	Improving Students' Attitudes about Corporate Social Responsibility via 'Apps': A Perspective Integrating Elaboration Likelihood Model and Social Media Capabilities	2021	Studies in Higher Education	Zhang, Xi and Zhou, Shuling and Yu, Yao and Cheng, Yihang and de Pablos, Patricia OrdÃ³Ã±ez and Lytras, Miltiadis D.	drop
497	786020692	Extending Indonesia Government Policy for E-Learning and Social Media Usage	2021	Pegem Journal of Education and Instruction	Salehudin, Mohammad and Arifin, Ardian and Napitupulu, Darmawan and Zulherman	drop
498	786020693	ESL Learning via Facebook among Science and Non-Science University Students	2021	International Journal of Virtual and Personal Learning Environments	Kasuma, Shaidatul Akma Adi	drop
499	786020694	Developing Professional Networks: The Missing Link to Graduate Employability	2021	Education & Training	English, Peter and de Villiers Scheepers, Margarietha Johanna and Fleischman, David and Burgess, Jacqueline and Crimmins, Gail	drop
500	786020695	Providing Multilingual Logistics Communication in COVID-19 Disaster Relief	2020	Multilingua: Journal of Cross-Cultural and Interlanguage Communication	Zhang, Jie and Wu, Yuqin	drop
501	786020696	Effect of the Scaffolded Reading Experience Using a Graphic Novel on the English Reading Comprehension and Reading Motivation of Thai EFL Students	2020	LEARN Journal: Language Education and Acquisition Research Network	Kennedy, Uthumporn and Chinokul, Sumalee	drop
502	786020697	The Effect of Social Media and Lecturer's Direct Instructions on Students' Digital Sculpting Skills	2020	European Journal of Science and Mathematics Education	Hiranyachattada, Tiantada and Kusirirat, Kampanat	drop
503	786020698	Student Use of Social Media, Academic Performance, and Creativity: The Mediating Role of Intrinsic Motivation	2020	Interactive Technology and Smart Education	Malik, Muhammad Jawad and Ahmad, Mudaser and Kamran, Muhammad Rizwan and Aliza, Komal and Elahi, Muhammad Zubair	drop
504	786020699	Social Media, Learning and Connections for International Students: The Disconnect between What Students Use and the Tools Learning Management Systems Offer	2020	Australasian Journal of Educational Technology	Sleeman, Jade and Lang, Catherine and Dakich, Eva	drop
505	786020700	Social Media Addiction and Academic Adjustment: The Mediating or Moderating Effect of Grit Personality	2020	International Journal of Psychology and Educational Studies	Chua, Siah Poh and YiRong, Brian Siew and Yang, Sai Zhi	drop
506	786020701	The Correlation between Social Media Usage in Academic Context and Self-Efficacy towards TPACK of Prospective Science Teachers in Indonesia	2020	Journal of Science Learning	Setiawan, Heru and Phillipson, Shane	drop
507	786020702	What Influences Australian Secondary Schools in Their Efforts to Prevent and Intervene in Cyberbullying?	2020	Educational Research	Pennell, Donna and Campbell, Marilyn and Tangen, Donna	drop
508	786020703	Investigating Older Adults' Intention to Learn Health Knowledge on Social Media	2020	Educational Gerontology	Shang, Lili and Zuo, Meiyun	drop
509	786020704	'Heavy Mountains' for Chinese Humanities and Social Science Academics in the Quest for World-Class Universities	2020	Compare: A Journal of Comparative and International Education	Gao, Xuesong and Zheng, Yongyan	drop
510	786020705	Introducing the Flip: A Mixed Method Approach to Gauge Student and Staff Perceptions on the Introduction of Flipped Pedagogy in Pre-Clinical Medical Education	2020	Australasian Journal of Educational Technology	Simmons, Margaret and Colville, Deb and Bullock, Shane and Willems, Julie and Machado, Michelle and McArdle, Adelle and Tare, Marianne and Kelly, Jayden and Taher, Mohammad Ali and Middleton, Sallyann and Shuttleworth, Marion and Reser, David	drop
511	786020706	Qualitative Expert Views' on the Feasibility of Tele-Counseling Services in Malaysia	2020	Journal of Education and e-Learning Research	Bakar, A. Y. A. and Mejah, H. and Amat, S.	drop
512	786020707	Academic Perspectives and Approaches to Social Media Use in Higher Education: A Pilot Study	2020	International Journal of Teaching and Learning in Higher Education	Sutherland, Karen and Terton, Uwe and Davis, Cindy and Driver, Christina and Visser, Irene	drop
513	786020708	Contextual Character Education for Students in the Senior High School	2020	European Journal of Educational Research	Hermino, Agustinus and Arifin, Imron	drop
514	786020709	Neurodiversity Awareness: Is Malaysia There Yet?	2019	International Journal of Evaluation and Research in Education	Rahman, Aida A. and Woollard, J.	drop
515	786020710	Looking Hot in Selfies: Narcissistic Beginnings, Aggressive Outcomes?	2019	International Journal of Behavioral Development	Stuart, Jaimee and Kurek, Anna	drop
516	786020711	Nannagogy: Social Movement Learning for Older Women's Activism in the Gas Fields of Australia	2019	Australian Journal of Adult Learning	Larri, Larraine and Whitehouse, Hilary	drop
517	786020712	Personality Traits of Thai Gen Z Undergraduates: Challenges in the EFL Classroom?	2019	PASAA: Journal of Language Teaching and Learning in Thailand	Sriprom, Chaisri and Rungswang, Atichat and Sukwitthayakul, Chirawan and Chansri, Natthicha	drop
518	786020713	Communication Channel between Teachers and Students in Chemistry Education: WhatsApp	2019	US-China Education Review A	Zan, Nuray	drop
519	786020714	Influence of Adolescents' Peer Relationships and Social Media on Academic Identity	2019	Asia Pacific Journal of Education	Wang, Chunli and Gu, Xiaoqing	drop
520	786020715	Design Principles for Heutagogical Learning: Implementing Student-Determined Learning with Mobile and Social Media Tools	2019	Australasian Journal of Educational Technology	Narayan, Vickel and Herrington, Jan and Cochrane, Thom	drop
521	786020716	Teachers' and Parents' Understanding of Traditional and Cyberbullying	2019	Journal of School Violence	Campbell, Marilyn and Whiteford, Chrystal and Hooijer, Johanna	drop
522	786020717	Educational Social Media Tools: Promoting Student Investment and Language Identity in the Midst of Digital Surveillance	2019	Australian Journal of Applied Linguistics	Barnes, Melissa	drop
523	786020718	Textbook Evaluation of a General English Textbook for Senior Foreign Language Learners: Application of a Textbook Evaluation Checklist	2019	Journal of Education and e-Learning Research	Dos Santos, Luis Miguel	drop
524	786020719	Evaluating Teacher and Learner Readiness to Use Facebook in an Australian Vocational Setting	2019	Studies in Continuing Education	Connolly, Toni and Willis, Jill and Lloyd, Margaret	drop
525	786020720	Modelling the Information-Seeking Behaviour of International Students in Their Use of Social Media in Malaysia	2018	Information Research: An International Electronic Journal	Bukhari, Sarah and Hamid, Suraya and Ravana, Sri Devi and Ijab, Mohamad Taha	drop
526	786020721	Cross, D., Lester, L., Barnes, A., Cardoso, P. & Hadwen, K. (2015). If It's about Me, Why Do It without Me? Genuine Student Engagement in School Cyberbullying Education. "International Journal of Emotional Education," 7 (1), 35-51. Postscript	2018	International Journal of Emotional Education	Cross, Donna and Barnes, Amy	drop
527	786020722	A Survey on Topics Rating for the Undergraduate and Diploma in Environmental Health	2018	SAGE Open	Arshad, Kamaruddin and Lean, Qi Ying and Ming, Long Chiau and Mahalingam, Sundara Rajan and Tiong, Chua Say and Abdullah, Amir Heberd and Shafie, Farah Ayuni	drop
528	786020723	Using an Online Social Media Space to Engage Parents in Student Learning in the Early-Years: Enablers and Impediments	2018	Digital Education Review	Willis, Linda-Dianne and Exley, Beryl	drop
529	786020724	The Importance of Social Connection for Cybervictims: How Connectedness and Technology Could Promote Mental Health and Wellbeing in Young People	2018	International Journal of Emotional Education	McLouglin, Larisa and Spears, Barbara and Taddeo, Carmel	drop
530	786020725	Social Media Facilitated English Prewriting Activity Design and Evaluation	2018	Asia-Pacific Education Researcher	Chang, Ben and Lu, Fang-Chen	drop
531	786020726	Cyberbullying Prevention and Intervention Programs in Schools: A Systematic Review	2018	School Psychology International	Tanrikulu, Ibrahim	drop
532	786020727	Debating the Use of Social Media in Higher Education in Australasia: Where Are We Now?	2018	Australasian Journal of Educational Technology	Willems, Julie and Adachi, Chie and Bussey, Francesca and Doherty, Iain and Huijser, Henk	drop
533	786020728	Student-Initiated Facebook Sites: Nurturing Personal Learning Environments or a Place for the Disenfranchised?	2018	Technology, Pedagogy and Education	Charteris, Jennifer and Parkes, Mitchell and Gregory, Sue and Fletcher, Peter and Reyes, Vicente	drop
534	786020729	Representations of Chinese Gendered and Racialised Bodies in Contemporary Media Sites	2018	Sport, Education and Society	Pang, Bonnie and Hill, Joanne	drop
535	786020730	Measuring the Impact of Out-of-Class Communication through Instant Messaging	2018	Education & Training	Nkhoma, Clara Akuzike and Thomas, Susan and Nkhoma, Mathews Zanda and Sriratanaviriyakul, Narumon and Truong, Trang Huyen and Vo, Hung Xuan	drop
536	786020731	Students' Internet Access, Internet Self-Efficacy, and Internet for Learning Physics: Gender and Grade Differences	2018	Journal of Technology and Science Education	Suana, Wayan	drop
537	786020732	Therapists' Perspectives: Supporting Children to Use Switches and Technology for Accessing Their Environment, Leisure, and Communication	2018	Journal of Occupational Therapy, Schools & Early Intervention	Beauchamp, Fiona and Bourke-Taylor, Helen and Brown, Ted	drop
538	786020733	Emotional Responses to Bullying among Japanese Adolescents: Gender, Context, and Incidence Visibility	2018	International Journal of School & Educational Psychology	Aoyama, Ikuko and Yanagida, Takuya and Wright, Michelle F.	drop
539	786020734	Popular Social Media as a Tool for Enhancing Community-Based End-of-Life Care Education for Healthcare Professionals: A Formative Study	2018	Educational Gerontology	Hirakawa, Yoshihisa and Uemura, Mayu Yasuda and Chiang, Chifa and Aoyama, Atsuko	drop
540	786020735	Scholars in an Increasingly Open and Digital World: Imagined Audiences and Their Impact on Scholars' Online Participation	2018	Learning, Media and Technology	Veletsianos, George and Shaw, Ashley	drop
541	786020736	Investigating the Building of a WeChat-Based Community of Practice for Language Teachers' Professional Development	2018	Innovation in Language Learning and Teaching	Qi, Grace Yue and Wang, Yuping	drop
542	786020737	Disruptive Silence: Deepening Experiential Learning in the Absence of Technology	2018	Journal of Adventure Education and Outdoor Learning	Smith, Carol A. and Parks, Rodney and Parrish, Jesse and Swirski, Ryan	drop
543	786020738	"Think before You Type": The Effectiveness of Implementing an Anti-Cyberbullying Project in an EFL Classroom	2018	Pedagogies: An International Journal	Chen, Cheryl Wei-yu	retrieved
544	786020739	How Do Personality Traits Shape Information-Sharing Behaviour in Social Media? Exploring the Mediating Effect of Generalized Trust	2017	Information Research: An International Electronic Journal	Deng, Shengli and Lin, Yanqing and Liu, Yong and Chen, Xiaoyu and Li, Hongxiu	drop
545	786020740	Cyberbullying in Australian Primary Schools: How Victims Differ in Attachment, Locus of Control, Self-Esteem, and Coping Styles Compared to Non-Victims	2017	Journal of Psychologists and Counsellors in Schools	Muller, Rachel D. and Skues, Jason L. and Wise, Lisa Z.	drop
546	786020741	The Effectiveness of the Chemistry Problem Based Learning (PBL) via FB among Pre-University Students	2017	Journal of Education and e-Learning Research	Sunar, Mohd Shahir Mohamed and Shaari, Ahmad Jelani	drop
547	786020742	Research Support in Australian Academic Libraries: Services, Resources, and Relationships	2017	New Review of Academic Librarianship	Haddow, Gaby and Mamtora, Jayshree	drop
548	786020743	Recommendations of School Students with Autism Spectrum Disorder and Their Parents in Regard to Bullying and Cyberbullying Prevention and Intervention	2017	International Journal of Inclusive Education	Carrington, Suzanne and Campbell, Marilyn and Saggers, Beth and Ashburner, Jill and Vicig, Fiona and Dillon-Wallace, Julie and Hwang, Yoon-Suk	drop
549	786020744	Instructional Strategies to Support Creativity and Innovation in Education	2017	Journal of Education and Learning	Seechaliao, Thapanee	drop
550	786020745	Designing Informal Learning Experiences for Early Career Academics Using a Knowledge Ecosystem Model	2017	Journal of Further and Higher Education	Miller, Faye and Partridge, Helen and Bruce, Christine and Hemmings, Brian	drop
551	786020746	Social Media and Their Use in Learning: A Comparative Analysis between Australia and Malaysia from the Learners' Perspectives	2017	Australasian Journal of Educational Technology	Balakrishnan, Vimala and Teoh, Kung Keat and Pourshafie, Tahereh and Liew, Teik Kooi	drop
552	786020747	Status Quo and Prospective of WeChat in Improving Chinese English Learners' Pronunciation	2017	English Language Teaching	Wang, Kanghui	drop
553	786020748	Perceived Severity of Cyberbullying Behaviour: Differences between Genders, Grades and Participant Roles	2017	Educational Psychology	Chen, Li-Ming and Cheng, Ying-Yao	drop
554	786020749	Communicative Competence of the Fourth Year Students: Basis for Proposed English Language Program	2017	English Language Teaching	Tuan, Vu Van	drop
555	786020750	Extending the Classroom Walls: Using Academic Blogging as an Intervention Strategy to Improve Critical Literacy Skills with Elementary Students	2017	Education 3-13	Chamberlain, Elizabeth	drop
556	786020751	Social Media Challenges and Affordances for International Students: Bridges, Boundaries, and Hybrid Spaces	2016	Journal of Studies in International Education	Sleeman, Jade and Lang, Catherine and Lemon, Narelle	drop
557	786020752	Cyber- and Face-to-Face Bullying: Who Crosses Over?	2016	Social Psychology of Education: An International Journal	Shin, Hwayeon Helene and Braithwaite, Valerie and Ahmed, Eliza	drop
558	786020753	"Bring Your Own Device": Considering Potential Risks to Student Health	2016	Health Education Journal	Merga, Margaret K.	drop
559	786020754	Networked Participatory Online Learning Design and Challenges for Academic Integrity in Higher Education	2016	International Journal for Educational Integrity	O'Connell, Judy	drop
560	786020755	Instant Messaging as Digital Discourse Socialization in the Context of English for Academic Purposes	2016	Journal of Education and Practice	Prinsloo, Christiaan and Nam, Kyungmin and Shim, Joonboh	drop
561	786020756	Marketing Effectiveness of the Nanjing Youth Olympic Games: Implications for Physical Activity	2016	Physical Educator	Judge, Lawrence W. and Lee, Don and Hoover, Donald L. and Petersen, Jeffrey C. and Bellar, David M. and Deitz, Sarah and Leitzelar, Brianna and Holtzclaw, Kara	drop
562	786020757	School Policies on Bullying and Cyberbullying: Perspectives across Three Australian States	2016	Educational Research	Chalmers, Caitlin and Campbell, Marilyn Anne and Spears, Barbara A and Butler, Des and Cross, Donna and Slee, Phillip and Kift, Sally	drop
563	786020758	Re-Examining Students' Perception of E-Learning: An Australian Perspective	2016	International Journal of Educational Management	Loh, Claire and Wong, David H. and Quazi, Ali and Kingshott, Russel Philip	drop
564	786020759	Using Social Media to Promote Pre-Service Science Teachers' Practices of Socio-Scientific Issue (SSI) - Based Teaching	2015	Asia-Pacific Forum on Science Learning and Teaching	Pitiporntapin, Sasithep and Lankford, Deanna Marie	drop
565	786020760	Facebook and the Final Practicum: The Impact of Online Peer Support in the Assistant Teacher Program	2015	Australian Journal of Teacher Education	Paris, Lisa F. and Boston, Julie and Morris, Julia	drop
566	786020761	If It's about Me, Why Do It without Me? Genuine Student Engagement in School Cyberbullying Education	2015	International Journal of Emotional Education	Cross, Donna and Lester, Leanne and Barnes, Amy and Cardoso, Patricia and Hadwen, Kate	retrieved
567	786020762	Study Abroad Information in the New Media	2015	Journal of Marketing for Higher Education	Teng, Shasha and Khong, Kok Wei and Chong, Alain Yee Loong	drop
568	786020763	Social Media's Use in Postgraduate Students' Decision-Making Journey: An Exploratory Study	2015	Journal of Marketing for Higher Education	Galan, Mianda and Lawley, Meredith and Clements, Michael	drop
569	786020764	The Efficacy of Social Media Technologies in Academia: A Pedagogical Bliss or Digital Fad?	2015	International Journal of Higher Education	Kivunja, Charles	drop
570	786020765	Social Media for Learning and Teaching Undergraduate Sciences: Good Practice Guidelines from Intervention	2015	Electronic Journal of e-Learning	Thalluri, Jyothi and Penman, Joy	drop
571	786020766	What Health-Related Information Flows through You Every Day? A Content Analysis of Microblog Messages on Air Pollution	2015	Health Education	Yang, Qinghua and Yang, Fan and Zhou, Chun	drop
572	786020767	Project-Based Learning Using Discussion and Lesson-Learned Methods via Social Media Model for Enhancing Problem Solving Skills	2015	International Education Studies	Jewpanich, Chaiwat and Piriyasurawong, Pallop	drop
573	786020768	Reflections of Students' Language Usage in Social Networking Sites: Making or Marring Academic English	2015	Electronic Journal of e-Learning	Thurairaj, Saraswathy and Hoon, Er Pek and Roy, Swagata Sinha and Fong, Pok Wei	drop
574	786020769	Innovative Methodologies for 21st Century Learning, Teaching and Assessment: A Convenience Sampling Investigation into the Use of Social Media Technologies in Higher Education	2015	International Journal of Higher Education	Kivunja, Charles	drop
575	786020770	Perceived Severity of School Bullying in Elementary Schools Based on Participants' Roles	2015	Educational Psychology	Chen, Li Ming and Cheng, Wen and Ho, Hsiao-Chi	drop
576	786020771	Learning to Use the Internet and Online Social Media: What Is the Effectiveness of Home-Based Intervention for Youth with Complex Communication Needs?	2014	Child Language Teaching and Therapy	Grace, Emma and Raghavendra, Parimala and Newman, Lareen and Wood, Denise and Connell, Tim	drop
577	786020772	Effects of Mobile Instant Messaging on Collaborative Learning Processes and Outcomes: The Case of South Korea	2014	Educational Technology & Society	Kim, Hyewon and Lee, MiYoung and Kim, Minjeong	drop
578	786020773	The Internet Is Forever: Student Indiscretions Reveal the Need for Effective Social Media Policies in Academia	2014	American Journal of Distance Education	Woodley, Carolyn and Silvestri, Michel	drop
579	786020774	Do Cyberbullies Suffer Too? Cyberbullies' Perceptions of the Harm They Cause to Others and to Their Own Mental Health	2013	School Psychology International	Campbell, Marilyn A. and Slee, Phillip T. and Spears, Barbara and Butler, Des and Kift, Sally	drop
580	786020775	Cyberbullying and Its Risk Factors among Chinese High School Students	2013	School Psychology International	Zhou, Zongkui and Tang, Hanying and Tian, Yuan and Wei, Hua and Zhang, Fengjuan and Morrison, Chelsey M.	drop
581	786020776	Crossing Boundaries in Facebook: Students' Framing of Language Learning Activities as Extended Spaces	2013	International Journal of Computer-Supported Collaborative Learning	Lantz-Andersson, Annika and Vigmo, Sylvi and Bowen, Rhonwen	drop
582	786020777	The South Australia Health Chronic Disease Self-Management Internet Trial	2013	Health Education & Behavior	Lorig, Kate and Ritter, Philip L. and Plant, Kathryn and Laurent, Diana D. and Kelly, Pauline and Rowe, Sally	drop
583	786020778	Social Media in the Classroom: A Simple yet Complex Hybrid Environment for Students	2013	Journal of Educational Multimedia and Hypermedia	Casey, Gail	drop
584	786020779	Helping Second Language Literature Learners Overcome E-Learning Difficulties: LET-NET Team Teaching with Online Peer Interaction	2013	Journal of Education and Learning	Wu, Pin-Hsiang Natalie and Marek, Michael W.	drop
585	786020780	Emergence of Informal Educative Space out of an Anonymous Online Bulletin Board in Korea during the Global Economic Crisis	2013	International Journal of Lifelong Education	Kang, Dae Joong and Choi, Seon Joo and Lee, SeungHyeop	drop
586	786020781	The Influence of Moral Disengagement, Morally Based Self-Esteem, Age, and Gender on Traditional Bullying and Cyberbullying	2013	Journal of School Violence	Robson, Claire and Witenberg, Rivka T.	drop
587	786020782	Face to Facebook: Social Media and the Learning and Teaching Potential of Symmetrical, Synchronous Communication	2013	Journal of University Teaching and Learning Practice	VanDoorn, George and Eklund, Antoinette A.	drop
588	786020783	Rates of Cyber Victimization and Bullying among Male Australian Primary and High School Students	2012	School Psychology International	Sakellariou, Tass and Carroll, Annemaree and Houghton, Stephen	drop
589	786020784	Engaging Students in Higher Education through Mobile Learning: Lessons Learnt in a Chinese Entrepreneurship Course	2012	Educational Research for Policy and Practice	Menkhoff, Thomas and Bengtsson, Magnus Lars	drop
590	786020785	Cyber-Management of People with Chronic Disease: A Potential Solution to eHealth Challenges	2012	Health Education Journal	Laakso, E-Liisa and Armstrong, Kylie and Usher, Wayne	drop
591	786020786	The Effects of Online Discussion Forum Aggressive Messages and Cognitive Distortion on Users' Negative Affect and Aggression	2012	Turkish Online Journal of Educational Technology - TOJET	Chiang, Yu-Tzu and Lin, Sunny S. J. and Liu, Eric Zhi-Feng	drop
592	786020787	Cyber Bullying and Academic Performance	2011	International Journal Of Computational Engineering Research	Faryadi, Qais	drop
593	786020788	The Shades of Grey of Cyberbullying in Australian Schools	2011	Australian Journal of Education	Goff, Wendy	drop
594	786020789	Normative Beliefs about Aggression as a Mediator of Narcissistic Exploitativeness and Cyberbullying	2011	Journal of Interpersonal Violence	Ang, Rebecca P. and Tan, Kit-Aun and Mansor, Abu Talib	drop
595	786020790	Current Evidence of Best Practice in Whole-School Bullying Intervention and Its Potential to Inform Cyberbullying Interventions	2011	Australian Journal of Guidance and Counselling	Pearce, Natasha and Cross, Donna and Monks, Helen and Waters, Stacey and Falconer, Sarah	drop
596	786020791	The Development of Internet Use for Communication among Undergraduate Students: A Multilevel Analysis	2011	Asia Pacific Education Review	Huang, Chiungjung	drop
597	786020792	More than Chatting Online: Children, Marketing and the Use of Digital Media	2011	English in Australia	Snyder, Ilana and Jevons, Colin and Henderson, Michael and Gabbott, Mark and Beale, Denise	drop
598	786020793	Community Creation by Means of a Social Media Paradigm	2010	Learning Organization	Fernando, Isuru	drop
599	786020794	Blended Learning Environments: Using Social Networking Sites to Enhance the First Year Experience	2010	Australasian Journal of Educational Technology	McCarthy, Joshua	drop
600	786020795	The Impact of Electronic Communication Technology on Written Language	2009	US-China Education Review	Hamzah, Mohd. Sahandri Gani B. and Ghorbani, Mohd. Reza and Abdullah, Saifuddin Kumar B.	drop
601	786020796	How Instant Messaging Affects the Satisfaction of Virtual Interpersonal Behavior of Taiwan Junior High School Students	2007	Adolescence (San Diego): an international quarterly devoted to the physiological, psychological, psychiatric, sociological, and educational aspects of the second decade of human life	Lin, Chien-Huang and Sun, Ya-Chung and Lee, Yueh-Chiang and Wu, Shih-Chia	drop
602	786020797	Local Solutions for Local Problems: Addressing Teacher Supply in Rural Communities	2007	Education in Rural Australia	Yates, Russell	drop
603	786020798	Cyber Bullying: An Old Problem in a New Guise?	2005	Australian Journal of Guidance and Counselling	Campbell, Marilyn A.	drop
604	786020799	Time to stop making things worse: An imperative focus for healthcare student bullying research	2018	New Zealand Medical Journal	Blakey, Althea Gamble and Anderson, Lynley and Smith-Han, Kelby and Wilkinson, Tim and Collins, Emma and Berryman, Elizabeth	drop
605	786020800	Editorial: Selective Prevention in Anti-Bullying Programs: Could Targeting Personality Be the Answer?	2020	Journal of the American Academy of Child and Adolescent Psychiatry	Bowes, Lucy	drop
606	786020801	The development and pilot testing of an adolescent bullying intervention in Indonesiaâ€“the ROOTS Indonesia program	2019	Global Health Action	Bowes, Lucy and Aryani, Farida and Ohan, Faridah and Haryanti, Rina Herlina and Winarna, Sri and Arsianto, Yuli and Budiyawati, Hening and Widowati, Evi and Saraswati, Rika and Kristianto, Yuliana and Suryani, Yulinda Erma and Ulum, Derry Fahrizal and Minnick, Emilie	retrieved
607	786020802	Defending victims of cyberbullying: The role of self-efficacy and moral disengagement	2020	Journal of School Psychology	Bussey, Kay and Luo, Aileen and Fitzpatrick, Sally and Allison, Kimberley	drop
608	786020803	Cyberbullying and suicide ideation among Hong Kong adolescents: The mitigating effects of life satisfaction with family, classmates and academic results	2019	Psychiatry Research	Chang, Qingsong and Xing, Jianli and Ho, Rainbow T.H. and Yip, Paul S.F.	drop
609	786020804	Family poly-victimization and cyberbullying among adolescents in a Chinese school sample	2018	Child Abuse and Neglect	Chen, Qi Qi and Lo, Camilla K.M. and Zhu, Yuhong and Cheung, Anne and Chan, Ko Ling and Ip, Patrick	drop
610	786020805	Youth Internet Safety Education: Aligning Programs With the Evidence Base	2021	Trauma, Violence, and Abuse	Finkelhor, David and Walsh, Kerryann and Jones, Lisa and Mitchell, Kimberly and Collier, Anne	drop
611	786020806	Technology-Facilitated Domestic and Sexual Violence: A Review	2020	Violence Against Women	Henry, Nicola and Flynn, Asher and Powell, Anastasia	drop
612	786020807	Technology-Facilitated Sexual Violence: A Literature Review of Empirical Research	2018	Trauma, Violence, and Abuse	Henry, Nicola and Powell, Anastasia	drop
613	786020808	Cyberbullying toward maori is rife in new zealand: Incidences and demographic differences in experiences of cyberbullying among maori	2021	Cyberpsychology, Behavior, and Social Networking	Houkamau, Carla and Satherley, Nicole and Stronge, Samantha and Wolfgramm, Rachel and Dell, Kiri and Mika, Jason and Newth, Jamie and Sibley, Chris G.	drop
614	786020809	Cyberbullying Victimization and Perpetration in Adolescents with High-Functioning Autism Spectrum Disorder: Correlations with Depression, Anxiety, and Suicidality	2019	Journal of Autism and Developmental Disorders	Hu, Huei Fan and Liu, Tai Ling and Hsiao, Ray C. and Ni, Hsing Chang and Liang, Sophie Hsin Yi and Lin, Chiao Fan and Chan, Hsiang Lin and Hsieh, Yi Hsuan and Wang, Liang Jen and Lee, Min Jing and Chou, Wen Jiun and Yen, Cheng Fang	drop
615	786020810	Bullying victimization, mental disorders, suicidality and self-harm among Australian high schoolchildren: Evidence from nationwide data	2020	Psychiatry Research	Islam, Md Irteja and Khanam, Rasheda and Kabir, Enamul	drop
616	786020811	Economic Evaluation of an Intervention Designed to Reduce Bullying in Australian Schools	2022	Applied Health Economics and Health Policy	Jadambaa, Amarzaya and Graves, Nicholas and Cross, Donna and Pacella, Rosana and Thomas, Hannah J. and Scott, James G. and Cheng, Qinglu and Brain, David	drop
617	786020812	Prevalence of traditional bullying and cyberbullying among children and adolescents in Australia: A systematic review and meta-analysis	2019	Australian and New Zealand Journal of Psychiatry	Jadambaa, Amarzaya and Thomas, Hannah J. and Scott, James G. and Graves, Nicholas and Brain, David and Pacella, Rosana	drop
618	786020813	Difficulties in Emotion Regulation and Cyberbullying Among Chinese Adolescents: A Mediation Model of Loneliness and Depression	2022	Journal of Interpersonal Violence	Jiang, Qianyun and Zhao, Fengqing and Xie, Xiaochun and Wang, Xingchao and Nie, Jia and Lei, Li and Wang, Pengcheng	drop
619	786020814	Cybervictimisation of adolescents predicts higher rumination, which in turn, predicts worse sleep over time	2018	Journal of Adolescence	Jose, Paul E. and Vierling, Alexandra	drop
620	786020815	Social Intelligence Counseling Intervention to Reduce Bullying Behaviors Among Thai Lower Secondary School Students: A Mixed-method Study.	2021	Journal of preventive medicine and public health = Yebang Uihakhoe chi	Jueajinda, Samith and Stiramon, Orapin and Ekpanyaskul, Chatchai	retrieved
621	786020816	Effects of a smartphone application for cognitive rehearsal intervention on workplace bullying and turnover intention among nurses	2019	International Journal of Nursing Practice	Kang, Jiyeon and Jeong, Yeon Jin	retrieved
622	786020817	A Novel Approach to Tackling Bullying in Schools: Personality-Targeted Intervention for Adolescent Victims and Bullies in Australia	2020	Journal of the American Academy of Child and Adolescent Psychiatry	Kelly, Erin V. and Newton, Nicola C. and Stapinski, Lexine A. and Conrod, Patricia J. and Barrett, Emma L. and Champion, Katrina E. and Teesson, Maree	retrieved
623	786020818	Prospective associations between personality and bullying among Australian adolescents	2018	Australian and New Zealand Journal of Psychiatry	Kelly, Erin V. and Newton, Nicola C. and Stapinski, Lexine A. and Teesson, Maree	drop
624	786020819	Cyberbullying, student nursesâ€™ ethical awareness and the Covid-19 pandemic	2021	Nursing Ethics	Kim, Ka Young and Choi, Jeong Sil	drop
625	786020820	Childhood Emotional Abuse and Cyberbullying Perpetration: The Role of Dark Personality Traits	2021	Journal of Interpersonal Violence	Kircaburun, Kagan and Jonason, Peter and Griffiths, Mark D. and Aslanargun, Engin and Emirtekin, Emrah and TosuntaÅŸ, Åžule B. and Billieux, JoÃ«l	drop
626	786020821	Mothersâ€™ difficulties and expectations for intervention of bullying among young children in South Korea	2019	International Journal of Environmental Research and Public Health	Lee, Seung Ha and Ju, Hyun Jung	drop
627	786020822	Prevention Through Job Design: Identifying High-Risk Job Characteristics Associated With Workplace Bullying	2019	Journal of Occupational Health Psychology	Li, Yiqiong and Chen, Peter Y. and Tuckey, Michelle R. and McLinton, Sarven S. and Dollard, Maureen F.	drop
628	786020823	The longitudinal influence of cyberbullying victimization on depression and posttraumatic stress symptoms: The mediation role of rumination	2020	Archives of Psychiatric Nursing	Liu, Caimeng and Liu, Zhen and Yuan, Guangzhe	drop
629	786020824	Mindfulness and Cyberbullying Among Chinese Adolescents: The Mediating Roles of Perceived Social Support and Empathy	2020	Violence and Victims	Liu, Caimeng and Wang, Linjia and Liu, Zhen and Li, Ying and Yuan, Guangzhe	drop
630	786020825	Developing wellbeing through a randomised controlled trial of a martial arts based intervention: An alternative to the anti-bullying approach	2019	International Journal of Environmental Research and Public Health	Moore, Brian and Woodcock, Stuart and Dudley, Dean	retrieved
631	786020826	Effects of a Collaborative Board Game on Bullying Intervention: A Group-Randomized Controlled Trial	2018	Journal of School Health	Nieh, Hsi Ping and Wu, Wen Chi	retrieved
632	786020827	School-based education to prevent bullying in high schools in Indonesia	2021	Pediatrics International	Noboru, Tamaki and Amalia, Emmy and Hernandez, Paul Michael R. and Nurbaiti, Lina and Affarah, Wahyu Sulistya and Nonaka, Daisuke and Takeuchi, Rie and Kadriyan, Hamsu and Kobayashi, Jun	drop
633	786020828	Longitudinal relationships between sexting and involvement in both bullying and cyberbullying	2019	Journal of Adolescence	Ojeda, MÃ³nica and Del Rey, Rosario and Hunter, Simon C.	drop
634	786020829	Psychosocial Difficulties and Help-Seeking Behaviors in Singapore Adolescents Involved in Cyberbullying	2021	Cyberpsychology, Behavior, and Social Networking	Ong, Say How and Tan, Yi Ren and Khong, Jerrine Z.N. and Elliott, John M. and Sourander, Andre and Fung, Daniel S.S.	drop
635	786020830	How teachers deal with cases of bullying at school: What victims say	2020	International Journal of Environmental Research and Public Health	Rigby, Ken	retrieved
636	786020831	Organisational antecedents of workplace victimisation: The role of organisational climate, culture, leadership, support, and justice in predicting junior doctors' exposure to bullying at work	2020	International Journal of Health Planning and Management	Samsudin, Ely Zarina and Isahak, Marzuki and Rampal, Sanjay and Rosnah, Ismail and Zakaria, Mohd Idzwan	drop
637	786020832	What do nurses and midwives value about their jobs? results from a discrete choice experiment	2015	Journal of Health Services Research and Policy	Scott, Anthony and Witt, Julia and Duffield, Christine and Kalb, Guyonne	drop
638	786020833	Physical fighting among school-attending adolescents in pakistan: Associated factors and contextual influences	2019	International Journal of Environmental Research and Public Health	Shaikh, Masood Ali and Abio, Anne and Celedonia, Karen L. and Wilson, Michael Lowery	drop
639	786020834	Examining Cross-Cultural Differences in Youth's Moral Perceptions of Cyberbullying	2019	Cyberpsychology, Behavior, and Social Networking	Shohoudi Mojdehi, Atiyeh and Leduc, Karissa and Shohoudi Mojdehi, Azadeh and Talwar, Victoria	drop
640	786020835	Is involvement in school bullying associated with increased risk of murderous ideation and behaviours among adolescent students in China?	2019	BMC Psychiatry	Su, Pu Yu and Wang, Geng Fu and He, Huan and Han, A. Zhu and Zhang, Guo Bao and Xu, Nuo	drop
641	786020836	"i felt angry, but i couldn't do anything about it": A qualitative study of cyberbullying among Taiwanese high school students	2019	BMC Public Health	Wang, Chia Wen and Musumari, Patou Masika and Techasrivichien, Teeranee and Suguimoto, S. Pilar and Chan, Chang Chuan and Ono-Kihara, Masako and Kihara, Masahiro and Nakayama, Takeo	drop
642	786020837	Relationships between traditional and cyber harassment and self-identity confusion among Taiwanese gay and bisexual men in emerging adulthood	2019	Comprehensive Psychiatry	Wang, Chien Chuan and Chang, Yu Ping and Yang, Yi Hsin and Hu, Huei Fan and Yen, Cheng Fang	drop
643	786020838	How Common Is Cyberbullying among Adults? Exploring Gender, Ethnic, and Age Differences in the Prevalence of Cyberbullying	2019	Cyberpsychology, Behavior, and Social Networking	Wang, Meng Jie and Yogeeswaran, Kumar and Andrews, Nadia P. and Hawi, Diala R. and Sibley, Chris G.	drop
644	786020839	The gender discrepancy in high-risk behaviour outcomes in adolescents who have experienced cyberbullying in Indonesia	2018	Asian Journal of Psychiatry	Wiguna, Tjhin and Irawati Ismail, R. and Sekartini, Rini and Setyawati Winarsih Rahardjo, Noorhana and Kaligis, Fransiska and Prabowo, Albert Limawan and Hendarmo, Rananda	drop
645	786020840	Risk and Protective Factors of Suicidal Ideation and Attempt among Adolescents with Different Types of School Bullying Involvement	2015	Archives of Suicide Research	Yen, Cheng Fang and Liu, Tai Ling and Yang, Pinchen and Hu, Huei Fan	drop
646	786020841	The Differential Victimization Associated With Depression and Anxiety in Cross-Cultural Perspective: A Meta-Analysis	2019	Trauma, Violence, and Abuse	Yuchang, Jin and Junyi, Li and Junxiu, An and Jing, Wu and Mingcheng, He	drop
647	786020842	Cyberbullying victimization and nonsuicidal self-injury in adolescents: Testing a moderated mediating model of emotion reactivity and dispositional mindfulness	2022	Journal of Affective Disorders	Zhao, Haiyan and Gong, Xue and Huebner, E. Scott and Yang, Xiaoli and Zhou, Jianhua	drop
648	786020843	Factors associated with cyberbullying among vocational students based on the ecological system model in an ethnic minority area	2021	Medicine	Zhou, Li and Li, Chunyu	drop
649	786020844	Face-to-Face and Cyber-Victimization: A Longitudinal Study of Offline Appearance Anxiety and Online Appearance Preoccupation	2021	Journal of Youth and Adolescence	Zimmer-Gembeck, Melanie J. and Rudolph, Julia and Webb, Haley J. and Henderson, Leah and Hawes, Tanya	drop
650	786020845	Cyber-victimisation and mental health in young people: A co-twin control study	2021	Psychological Medicine	Baldwin, Jessie R. and Ayorech, Ziada and Rijsdijk, Fruhling V. and Schoeler, Tabea and Pingault, Jean Baptiste	drop
651	786020846	The Invisibility of Covert Bullying Among Students: Challenges for School Intervention	2012	Australian Journal of Guidance and Counselling	Barnes, Amy and Cross, Donna and Lester, Leanne and Hearn, Lydia and Epstein, Melanie and Monks, Helen	drop
652	786020847	Bullying Prevalence in Students With Autism Spectrum Disorder	2017	Australasian Journal of Special Education	Campbell, Marilyn and Hwang, Yoon-Suk and Whiteford, Chrystal and Dillon-Wallace, Julie and Ashburner, Jill and Saggers, Beth and Carrington, Suzanne	drop
653	786020848	Editorial for Applied Practices: Perspectives from the Field Section within the Journal of Psychologists and Counsellors in Schools edited by Associate Professor Susan Colmar	2018	Journal of Psychologists and Counsellors in Schools	Colmar, Susan	drop
654	786020849	Cyberbullying and its impact on young people's emotional health and well-being	2013	Psychiatrist	Cowie, Helen	drop
655	786020850	Cyberbullying, Self-concept and Academic Goals in Childhood	2019	The Spanish journal of psychology	Delgado, Beatriz and Escortell, Raquel and MartÃ­nez-Monteagudo, MarÃ­a Carmen and FerrÃ¡ndez-Ferrer, Alicia and SanmartÃ­n, Ricardo	drop
656	786020851	Cyberbullying and its effects on young adolescents: A community-based survey	2013	Irish Journal of Psychological Medicine	Healy, S. and Lynch, F.	drop
657	786020852	Mood and suicidality amongst cyberbullied adolescents- a cross-sectional study from youth risk behavior survey	2021	European Psychiatry	Hsieh, Y C and Jain, P and Veluri, N and Bhela, J and Sheikh, B and Bangash, F and Gude, J and Subhedar, R and Zhang, M and Shah, M and Mansuri, Z and Aedma, K and Parikh, T	drop
658	786020853	Cyberbullying as an act of revenge?	2010	Australian Journal of Guidance and Counselling	KÃ¶nig, Andreas and Gollwitzer, Mario and Steffgen, Georges	drop
659	786020854	Coping in the Cyberworld: Program Implementation and Evaluation â€“ A Pilot Project	2009	Australian Journal of Guidance and Counselling	Lam, Cecilia Wing Chi and Frydenberg, Erica	retrieved
660	786020855	Cyberbullying and internet safety: A survey of child and adolescent mental health practitioners	2021	Irish Journal of Psychological Medicine	Lonergan, Aoife and Moriarty, Amy and McNicholas, Fiona and Byrne, Triona	drop
661	786020856	Prevalence of Bullying and Cyberbullying in the Last Stage of Primary Education in the Basque Country	2018	Spanish Journal of Psychology	Machimbarrena, Juan Manuel and Garaigordobil, Maite	drop
662	786020857	Cyberbullying at school: Good practice and legal aspects in the United Kingdom	2010	Australian Journal of Guidance and Counselling	Marczak, Magdalena and Coyne, Iain	drop
663	786020858	Cyberbullying: Labels, behaviours and definition in three European countries	2010	Australian Journal of Guidance and Counselling	Nocentini, Annalaura and Calmaestra, Juan and Schultze-Krumbholz, Anja and Scheithauer, Herbert and Ortega, Rosario and Menesini, Ersilia	drop
664	786020859	Cyberbullying victimisation and internalising and externalising problems among adolescents: the moderating role of parentâ€“child relationship and child's sex	2020	Epidemiology and Psychiatric Sciences	Sampasa-Kanyinga, H and Lalande, K and Colman, I	drop
665	786020860	The Politics of Attributing Blame for Cyberattacks and the Costs of Uncertainty	2018	Perspectives on Politics	Schulzke, Marcus	drop
666	786020861	Social Support Seeking in Relation to Parental Attachment and Peer Relationships among Victims of Cyberbullying	2015	Journal of Psychologists and Counsellors in Schools	SevcÃ­kovÃ¡, Anna and MacHÃ¡ÄkovÃ¡, Hana and Wright, Michelle F. and DÄ›dkovÃ¡, Lenka and ÄŒernÃ¡, Alena	drop
667	786020862	Cyberbullying and suicidal ideation: Relationship with mood states and consumption of psychoactive substances	2017	European Psychiatry	Silva, D. and Nunes, J. and Ferreira, T. and Pissarra da Costa, A.	drop
668	786020863	Observing flaming or trolling online: Prevalence in russian youth and adolescents and relationship to tolerance and aggression	2021	European Psychiatry	Soldatova, G and Chigarkova, S and Koshevaya, A and Rasskazova, E	drop
669	786020864	Online-risks and user activity in Russian adolescents: Comparing results from 2010-2019 Russian population studies	2021	European Psychiatry	Soldatova, G and Rasskazova, E and Koshevaya, A	drop
670	786020865	Cyberbullying prevention: One primary schools approach	2010	Australian Journal of Guidance and Counselling	Tangen, Donna and Campbell, Marilyn	retrieved
671	786020866	A cyberbullying intervention with primary-aged students	2012	Australian Journal of Guidance and Counselling	Toshack, Troy and Colmar, Susan	retrieved
672	786020867	Promoting Mental Well-Being for Audiences in a Live-Streaming Game by Highlight-Based Bullet Comments	2021	2021 IEEE 10th Global Conference on Consumer Electronics (GCCE)	Xu, Junjie H. and Cai, Yulin and Fang, Zhou and Paliyawan, Pujana	drop
673	786020868	The Dog That Did Not Bark, the Dog That Did Bark, and the Dog That Should Have Barked: A Methodology for Cyber Deterrence Research	2021	International Studies Review	Lupovici, Amir	drop
674	786020869	Deterrence in the Cyber Realm: Public versus Private Cyber Capacity	2021	International Studies Quarterly	Kostyuk, Nadiya	drop
675	786020870	Breaking the Myth of Cyber Doom: Securitization and Normalization of Novel Threats	2021	International Studies Quarterly	Gomez, Miguel Alberto and Whyte, Christopher	drop
676	786020871	Digital Retaliation? Denial-of-Service Attacks after Sanction Events	2021	Journal of Global Security Studies	Lutscher, Philipp M	drop
677	786020872	Provocation as Agentic Practice: Gender Performativity in Online Strategies of Transgender Sex Workers	2021	Journal of Computer-Mediated Communication	Chib, Arul and Nguyen, Hoan and Lin, Daoyi	drop
678	786020873	Reviving the Principle of Non-Intervention in Cyberspace: The Path Forward	2020	Journal of Conflict and Security Law	Moulin, Thibault	drop
679	786020874	Religiosity and HIV Risk Behavior Involvement among "at Risk" Women	2003	Journal of Religion and Health	Elifson, Kirk W. and Klein, Hugh and Sterk, Claire E.	drop
680	786020875	Children exposed to community violence: The rationale for early intervention	2003	Clinical Child and Family Psychology Review	Berkowitz, Steven J.	drop
681	786020876	Understanding mechanisms of change in the development of antisocial behavior: The impact of a universal intervention	2005	Journal of Abnormal Child Psychology	Van Lier, Pol A.C. and Vuijk, Patricia and Crijnen, Alfons A.M.	drop
682	786020877	Assessing the effects of the dating violence prevention program "safe dates" using random coefficient regression modeling	2005	Prevention Science	Foshee, Vangie A. and Bauman, Karl E. and Ennett, Susan T. and Suchindran, Chirayath and Benefield, Thad and Linder, G. Fletcher	retrieved
683	786020878	Hidden from plain sight: Residents' domestic violence screening attitudes and reported practices	2006	Journal of General Internal Medicine	Baig, Arshiya and Shadigian, Elizabeth and Heisler, Michele	drop
684	786020879	Development of a Marketing Campaign to Recruit Non-adjudicated and Untreated Abusive Men for a Brief Telephone Intervention	2008	Journal of Family Violence	Mbilinyi, Lyungai F. and Zegree, Joan and Roffman, Roger A. and Walker, Denise and Neighbors, Clayton and Edleson, Jeffrey	drop
685	786020880	Efficacy of a randomized trial of a community and school-based anti-violence media intervention among small-town middle school youth	2008	Prevention Science	Swaim, Randall C. and Kelly, Kathleen	retrieved
686	786020881	Developmental risk factor research and sexual offending against children: A review of some methodological issues	2008	Archives of Sexual Behavior	McMillan, Dean and Hastings, Richard P. and Salter, Daniel C. and Skuse, David H.	drop
687	786020882	Profiles of child maltreatment perpetrators and risk for fatal assault: A latent class analysis	2009	Journal of Family Violence	Yampolskaya, Svetlana and Greenbaum, Paul E. and Berson, Ilene R.	drop
688	786020883	Preventing college women's sexual victimization through parent based intervention: A randomized controlled trial	2010	Prevention Science	Testa, Maria and Hoffman, Joseph H. and Livingston, Jennifer A. and Turrisi, Rob	drop
689	786020884	Men's avoidance coping and female partner's drinking behavior: A high-risk context for partner violence?	2010	Journal of Family Violence	Cohn, Amy M. and McCrady, Barbara S. and Epstein, Elizabeth E. and Cook, Sharon M.	drop
690	786020885	Child sexual abuse: Demography, impact, and interventions	2011	Journal of Child and Adolescent Trauma	Olafson, Erna	drop
691	786020886	Examination of the Relationship Between Parental Satisfaction and Child Maltreatment Potential While Considering Social Desirability	2011	Journal of Family Violence	Bradshaw, Kelsey Michael and Donohue, Brad and Cross, Chad and Urgelles, Jessica and Allen, Daniel N.	drop
692	786020887	The prevalence of exposure to domestic violence and the factors associated with co-occurrence of psychological and physical violence exposure: A sample from primary care patients	2011	BMC Public Health	Selic, Polona and Pesjak, Katja and Kersnik, Janko	drop
693	786020888	Mobilizing Communities to Implement Evidence-Based Practices in Youth Violence Prevention: The State of the Art	2011	American Journal of Community Psychology	Backer, Thomas E. and Guerra, Nancy G.	drop
694	786020889	Observations of Adolescent Peer Resistance Skills Following a Classroom-Based Healthy Relationship Program: A Post-intervention Comparison	2012	Prevention Science	Wolfe, David A. and Crooks, Claire V. and Chiodo, Debbie and Hughes, Raymond and Ellis, Wendy	drop
695	786020890	Minimizing risks and monitoring safety of an antenatal care intervention to mitigate domestic violence among young Indian women: The Dil Mil trial	2012	BMC Public Health	Krishnan, Suneeta and Subbiah, Kalyani and Chandra, Prabha and Srinivasan, Krishnamachari	drop
696	786020891	Effectiveness of school-based programs to reduce bullying: A commentary	2012	Journal of Experimental Criminology	Smith, Peter K. and Salmivalli, Christina and Cowie, Helen	drop
697	786020892	"Strength at Home" Group Intervention for Military Populations Engaging in Intimate Partner Violence: Pilot Findings	2013	Journal of Family Violence	Taft, Casey T. and Macdonald, Alexandra and Monson, Candice M. and Walling, Sherry M. and Resick, Patricia A. and Murphy, Christopher M.	drop
698	786020893	The comparative effectiveness of Integrated treatment for Substance abuse and Partner violence (I-StoP) and substance abuse treatment alone: A randomized controlled trial	2013	BMC Psychiatry	Kraanen, Fleur L. and Vedel, Ellen and Scholing, Agnes and Emmelkamp, Paul M.G.	drop
699	786020894	The anatomy of a community health center system-level intervention for intimate partner violence	2014	Journal of Urban Health	Rhodes, Karin V. and Grisso, Jeane Ann and Rodgers, Melissa and Gohel, Mira and Witherspoon, Marcy and Davis, Martha and Dempsey, Sandra and Crits-Christoph, Paul	drop
700	786020895	Preventing Maltreatment with a Community-Based Implementation of Parent-Child Interaction Therapy	2014	Journal of Child and Family Studies	Lanier, Paul and Kohl, Patricia L. and Benz, Joan and Swinger, Dawn and Drake, Brett	drop
701	786020896	Integrating a Mentorship Component in Programming for Care and Support of AIDS-Orphaned and Vulnerable Children: Lessons from the Suubi and Bridges Programs in Sub-Saharan Africa	2014	Global Social Welfare	Ssewamala, Fred M. and Nabunya, Proscovia and Mukasa, N. Miriam and Ilic, Vilma and Nattabi, Jennifer	drop
702	786020897	Engagement Matters: Lessons from Assessing Classroom Implementation of Steps to Respect: A Bullying Prevention Program Over a One-year Period	2014	Prevention Science	Low, Sabina and Van Ryzin, Mark J. and Brown, Eric C. and Smith, Brian H. and Haggerty, Kevin P.	retrieved
703	786020898	Longitudinal Association of Suicidal Ideation and Physical Dating Violence among High School Students	2014	Journal of Youth and Adolescence	Nahapetyan, Lusine and Orpinas, Pamela and Song, Xiao and Holland, Kristin	drop
704	786020899	The Social Health Intervention Project (SHIP): Protocol for a randomized controlled clinical trial assessing the effectiveness of a brief motivational intervention for problem drinking and intimate partner violence in an urban emergency department	2014	BMC Emergency Medicine	Rhodes, Karin V. and Rodgers, Melissa and Sommers, Marilyn and Hanlon, Alexandra and Crits-Christoph, Paul	drop
705	786020900	Tackling acute cases of school bullying in the KiVa anti-bullying program: A comparison of two approaches	2014	Journal of Abnormal Child Psychology	Garandeau, Claire F. and Poskiparta, Elisa and Salmivalli, Christina	drop
706	786020901	Trauma Characteristics and Posttraumatic Stress Disorder among Adolescent Survivors of Childhood Sexual Abuse	2014	Journal of Family Violence	McLean, Carmen P. and Morris, Sarah Herrick and Conklin, Phoebe and Jayawickreme, Nuwan and Foa, Edna B.	drop
707	786020902	Interpersonal psychotherapy versus treatment as usual for PTSD and depression among Sichuan earthquake survivors: A randomized clinical trial	2014	Conflict and Health	Jiang, Rui Fang and Tong, Hui Qi and Delucchi, Kevin L. and Neylan, Thomas C. and Shi, Qijia and Meffert, Susan M.	drop
708	786020903	Ten year outcomes of participants in the REACT (randomised evaluation of assertive community treatment in North London) study	2014	BMC Psychiatry	Killaspy, Helen and Mas-ExpÃ³sito, Laia and Marston, Louise and King, Michael	drop
709	786020904	Poly- and Distinct- Victimization in Histories of Violence Against Women	2014	Journal of Family Violence	Rodriguez-MenÃ©s, Jorge and Puig, David and Sobrino, Cristina	drop
710	786020905	Effect of Race on the Risk of Out-of-Home Placement Among Children with Caregivers Who Reported Domestic Violence	2015	Journal of Family Violence	Nwabuzor Ogbonnaya, Ijeoma	drop
711	786020906	A longitudinal study of the social and emotional predictors and consequences of cyber and traditional bullying victimisation	2015	International Journal of Public Health	Cross, Donna and Lester, Leanne and Barnes, Amy	drop
712	786020907	Child Sexual Abuse Prevention Training for Childcare Professionals: An Independent Multi-Site Randomized Controlled Trial of Stewards of Children	2015	Prevention Science	Rheingold, Alyssa A. and Zajac, Kristyn and Chapman, Jason E. and Patton, Meghan and de Arellano, Michael and Saunders, Benjamin and Kilpatrick, Dean	drop
713	786020908	The Effects of Moms and Teens for Safe Dates: A Dating Abuse Prevention Program for Adolescents Exposed to Domestic Violence	2015	Journal of Youth and Adolescence	Foshee, Vangie A. and Benefield, Thad and Dixon, Kimberly S. and Chang, Ling Yin and Senkomago, Virginia and Ennett, Susan T. and Moracco, Kathryn E. and Bowling, J. Michael	retrieved
714	786020909	Cluster randomized controlled trial protocol: Addressing reproductive coercion in health settings (ARCHES)	2015	BMC Women's Health	Tancredi, Daniel J. and Silverman, Jay G. and Decker, Michele R. and McCauley, Heather L. and Anderson, Heather A. and Jones, Kelley A. and Ciaravino, Samantha and Hicks, Angela and Raible, Claire and Zelazny, Sarah and James, Lisa and Miller, Elizabeth	drop
715	786020910	A test of outreach and drop-in linkage versus shelter linkage for connecting homeless youth to services	2016	Prevention Science	Slesnick, Natasha and Feng, Xin and Guo, Xiamei and Brakenhoff, Brittany and Carmona, Jasmin and Murnan, Aaron and Cash, Scottye and McRee, Annie Laurie	drop
716	786020911	Reaching the hard to reach: Longitudinal investigation of adolescents' attendance at an after-school sexual and reproductive health programme in Western Cape, South Africa	2015	BMC Public Health	Mathews, Catherine and Eggers, Sander Matthijs and De Vries, Petrus J. and Mason-Jones, Amanda J. and Townsend, Loraine and AarÃ¸, Leif Edvard and De Vries, Hein	drop
717	786020912	A Longitudinal Evaluation of the Positive Action Program in a Low-Income, Racially Diverse, Rural County: Effects on Self-Esteem, School Hassles, Aggression, and Internalizing Symptoms	2015	Journal of Youth and Adolescence	Guo, Shenyang and Wu, Qi and Smokowski, Paul R. and Bacallao, Martica and Evans, Caroline B.R. and Cotter, Katie L.	drop
718	786020913	Shared Risk Factors for the Perpetration of Physical Dating Violence, Bullying, and Sexual Harassment Among Adolescents Exposed to Domestic Violence	2016	Journal of Youth and Adolescence	Foshee, Vangie A. and McNaughton Reyes, H. Luz and Chen, May S. and Ennett, Susan T. and Basile, Kathleen C. and DeGue, Sarah and Vivolo-Kantor, Alana M. and Moracco, Kathryn E. and Bowling, J. Michael	drop
719	786020914	School Bulliesâ€™ Intention to Change Behavior Following Teacher Interventions: Effects of Empathy Arousal, Condemning of Bullying, and Blaming of the Perpetrator	2016	Prevention Science	Garandeau, Claire F. and Vartio, Annina and Poskiparta, Elisa and Salmivalli, Christina	drop
720	786020915	The Effects of the Moms and Teens for Safe Dates Program on Dating Abuse: a Conditional Process Analysis	2016	Prevention Science	Foshee, Vangie A. and Benefield, Thad and Chen, May S. and Reyes, Luz Mc Naughton and Dixon, Kimberly S. and Ennett, Susan T. and Moracco, Kathryn E. and Bowling, J. Michael	drop
721	786020916	Mediators of the Relation Between Community Violence and Sexual Risk Behavior Among Adults Attending a Public Sexually Transmitted Infection Clinic	2016	Archives of Sexual Behavior	Senn, Theresa E. and Walsh, Jennifer L. and Carey, Michael P.	drop
722	786020917	Effectiveness and feasibility of Narrative Exposure Therapy (NET) in patients with borderline personality disorder and posttraumatic stress disorder - a pilot study	2016	BMC Psychiatry	Steuwe, Carolin and RullkÃ¶tter, Nina and Ertl, Verena and Berg, Michaela and Neuner, Frank and Beblo, Thomas and Driessen, Martin	drop
723	786020918	Couple-Focused Prevention at the Transition to Parenthood, a Randomized Trial: Effects on Coparenting, Parenting, Family Violence, and Parent and Child Adjustment	2016	Prevention Science	Feinberg, Mark E. and Jones, Damon E. and Hostetler, Michelle L. and Roettger, Michael E. and Paul, Ian M. and Ehrenthal, Deborah B.	drop
724	786020919	Rigged or rigorous? Partnerships for research and evaluation of complex social problems: Lessons from the field of violence against women and girls	2016	Journal of Public Health Policy	Zimmerman, Cathy and Michau, Lori and Hossain, Mazeda and Kiss, Ligia and Borland, Rosilyne and Watts, Charlotte	drop
725	786020920	Reducing violence in poor urban areas of Honduras by building community resilience through community-based interventions	2016	International Journal of Public Health	Hansen-Nord, Nete Sloth and Kjaerulf, Finn and Almendarez, Juan and Rodas, Victor Morales and Castro, Julio	drop
726	786020921	KiVa Anti-Bullying Program in Italy: Evidence of Effectiveness in a Randomized Control Trial	2016	Prevention Science	Nocentini, Annalaura and Menesini, Ersilia	drop
727	786020922	Prevalence and Correlates of the Perpetration of Cyber Dating Abuse among Early Adolescents	2017	Journal of Youth and Adolescence	Peskin, Melissa F. and Markham, Christine M. and Shegog, Ross and Temple, Jeff R. and Baumler, Elizabeth R. and Addy, Robert C. and Hernandez, Belinda and Cuccaro, Paula and Gabay, Efrat K. and Thiel, Melanie and Emery, Susan Tortolero	drop
728	786020923	Feasibility trial of a scalable psychological intervention for women affected by urban adversity and gender-based violence in Nairobi	2016	BMC Psychiatry	Dawson, Katie S. and Schafer, Alison and Anjuri, Dorothy and Ndogoni, Lincoln and Musyoki, Caroline and Sijbrandij, Marit and van Ommeren, Mark and Bryant, Richard A.	drop
729	786020924	Preventing Adolescent Social Anxiety and Depression and Reducing Peer Victimization: Intervention Development and Open Trial	2016	Child and Youth Care Forum	La Greca, Annette M. and Ehrenreich-May, Jill and Mufson, Laura and Chan, Sherilynn	retrieved
730	786020925	Examination of the Extent to which Employment Factors are Associated with Reduced Child Maltreatment Potential and Drug Use	2017	Journal of Child and Family Studies	Donohue, Brad and Plant, Christopher P. and Barchard, Kimberly A. and Gillis, David J.	drop
731	786020926	Evaluating a multicomponent social behaviour change communication strategy to reduce intimate partner violence among married couples: study protocol for a cluster randomized trial in Nepal	2017	BMC Public Health	Clark, Cari Jo and Spencer, Rachael A. and Shrestha, Binita and Ferguson, Gemma and Oakes, J. Michael and Gupta, Jhumka	drop
732	786020927	Mental Health Referrals Reduce Recidivism in First-Time Juvenile Offenders, But How Do We Determine Who is Referred?	2017	Psychiatric Quarterly	Zeola, Michael P. and Guina, Jeffrey and Nahhas, Ramzi W.	drop
733	786020928	Enhancing Parenting Practices with Latino/a Immigrants: Integrating Evidence-Based Knowledge and Culture According to the Voices of Latino/a Parents	2017	Clinical Social Work Journal	Parra-Cardona, JosÃ© RubÃ©n and LÃ³pez-ZerÃ³n, Gabriela and Villa, Monica and Zamudio, EfraÃ­n and Escobar-Chew, Ana RocÃ­o and Domenech RodrÃ­guez, Melanie M.	drop
734	786020929	A High School-Based Evaluation of TakeCARE, a Video Bystander Program to Prevent Adolescent Relationship Violence	2017	Journal of Youth and Adolescence	Sargent, Kelli S. and Jouriles, Ernest N. and Rosenfield, David and McDonald, Renee	drop
735	786020930	Trauma-Focused Cognitive Behavioral Therapy for Commercially Sexually Exploited Youth	2017	Journal of Child and Adolescent Trauma	Cohen, Judith A. and Mannarino, Anthony P. and Kinnish, Kelly	drop
736	786020931	Integrated case management of repeated intimate partner violence: a randomized, controlled trial	2017	Cambridge Journal of Evidence-Based Policing	Goosey, Jonathan and Sherman, Lawrence and Neyroud, Peter	drop
737	786020932	DIAMOND (DIgital Alcohol Management on Demand): A feasibility RCT and embedded process evaluation of a digital health intervention to reduce hazardous and harmful alcohol use recruiting in hospital emergency departments and online	2018	Pilot and Feasibility Studies	Hamilton, Fiona L. and Hornby, Jo and Sheringham, Jessica and Linke, Stuart and Ashton, Charlotte and Moore, Kevin and Stevenson, Fiona and Murray, Elizabeth	drop
738	786020933	Protocol for a cluster-randomised controlled trial evaluating the impact of a preschool-based capacity building intervention on intimate partner violence and substance misuse in Sri Lanka	2018	BMC Public Health	Lokuge, Kamalini and Wallace, Polly and Subasinghe, Kalini and Thurber, Katherine and De Silva, Tissa and Clarke, Naomi and Waas, Dulshika and Liyanage, Nisansala and Attygalle, Udena and Carron-Arthur, Bradley and Rodrigo, Kalyana and Banks, Emily and D'Este, Cate and Rajapakse, Thilini	drop
739	786020934	Family Involvement in a Whole-School Bullying Intervention: Mothersâ€™ and Fathersâ€™ Communication and Influence with Children	2017	Journal of Child and Family Studies	Lester, Leanne and Pearce, Natasha and Waters, Stacey and Barnes, Amy and Beatty, Shelley and Cross, Donna	retrieved
740	786020935	Phase-based treatment versus immediate trauma-focused treatment in patients with childhood trauma-related posttraumatic stress disorder: Study protocol for a randomized controlled trial	2018	Trials	van Vliet, Noortje I. and Huntjens, Rafaele J.C. and Van Dijk, Maarten K. and de Jongh, Ad	drop
741	786020936	Perceptions of Men Who Have Perpetrated Intimate Partner Violence on Creating a Transition to Fatherhood Program	2018	Journal of Family Violence	Carlson, Juliana and Casey, Erin A.	drop
742	786020937	Predictive Policing in the Context of Residential Burglary: An Empirical Illustration on the Basis of a Pilot Project in Baden-WÃ¼rttemberg,Â Germany	2018	European Journal for Security Research	Gerstner, Dominik	drop
743	786020938	Prolonged exposure therapy and supportive counselling for posttraumatic stress disorder in adolescents in a community-based sample, including experiences of stakeholders: Study protocol for a comparative randomized controlled trial using task-shifting	2018	BMC Psychiatry	Rossouw, Jaco and Yadin, Elna and Alexander, Debra and Seedat, Soraya	drop
744	786020939	Health-related quality of life associated with bullying and aggression: a cross-sectional study in English secondary schools	2018	European Journal of Health Economics	Fantaguzzi, Catherine and Allen, Elizabeth and Miners, Alec and Christie, Deborah and Opondo, Charles and Sadique, Zia and Fletcher, Adam and Grieve, Richard and Bonell, Chris and Viner, Russell M. and Legood, Rosa	drop
745	786020940	A community-based randomized controlled trial of Mom Power parenting intervention for mothers with interpersonal trauma histories and their young children	2017	Archives of Women's Mental Health	Rosenblum, Katherine L. and Muzik, Maria and Morelen, Diana M. and Alfafara, Emily A. and Miller, Nicole M. and Waddell, Rachel M. and Schuster, Melisa M. and Ribaudo, Julie	drop
746	786020941	Project Date SMART: a Dating Violence (DV) and Sexual Risk Prevention Program for Adolescent Girls with Prior DV Exposure	2018	Prevention Science	Rizzo, Christie J. and Joppa, Meredith and Barker, David and Collibee, Charlene and Zlotnick, Caron and Brown, Larry K.	retrieved
747	786020942	Prevention of violent revictimization in depressed patients with an add-on internet-based emotion regulation training (iERT): Study protocol for a multicenter randomized controlled trial	2018	BMC Psychiatry	Christ, Carolien and de Waal, Marleen M. and van Schaik, Digna J.F. and Kikkert, Martijn J. and Blankers, Matthijs and Bockting, Claudi L.H. and Beekman, Aartjan T.F. and Dekker, Jack J.M.	retrieved
748	786020943	Effects of Recruit Training on Police Attitudes Towards Diversity: a Randomised Controlled Trial of a Values Education Programme	2017	Cambridge Journal of Evidence-Based Policing	Platz, Deborah and Sargeant, Elise and Strang, Heather	drop
749	786020944	Promoting Adolescent Girlsâ€™ Well-Being in Pakistan: a Mixed-Methods Study of Change Over Time, Feasibility, and Acceptability, of the COMPASS Program	2018	Prevention Science	Asghar, Khudejha and Mayevskaya, Yana and Sommer, Marni and Razzaque, Ayesha and Laird, Betsy and Khan, Yasmin and Qureshi, Shamsa and Falb, Kathryn and Stark, Lindsay	drop
750	786020945	Relationship Dynamics in the Context of Binge Drinking and Polydrug Use Among Same-Sex Male Couples in Atlanta, Boston, and Chicago	2019	Archives of Sexual Behavior	Mimiaga, Matthew J. and Suarez, Nicolas and Garofalo, Robert and Frank, John and Ogunbajo, Adedotun and Brown, Emily and Bratcher, Anna and Pardee, Dana and Hidalgo, Marco A. and Hoehnle, Sam and Restar, Arjee and Wimbly, Taylor and Thai, Jennie and Sullivan, Patrick S. and Stephenson, Rob	drop
751	786020946	Implementing a Coach-Delivered Dating Violence Prevention Program with High School Athletes	2018	Prevention Science	Jaime, Maria Catrina D. and McCauley, Heather L. and Tancredi, Daniel J. and Decker, Michele R. and Silverman, Jay G. and Oâ€™Connor, Brian and Miller, Elizabeth	drop
752	786020947	BEATVIC, a body-oriented resilience therapy using kickboxing exercises for people with a psychotic disorder: A feasibility study	2018	BMC Psychiatry	De Vries, Bertine and Van Der Stouwe, Elisabeth C.D. and Waarheid, Clement O. and Poel, Stefan H.J. and Van Der Helm, Erwin M. and Aleman, AndrÃ© and Arends, Johan and Pijnenborg, Gerdina H.M. and Van Busschbach, Jooske T.	retrieved
753	786020948	Effectiveness evaluation of the school-based drug prevention program #Tamojunto2.0: Protocol of a cluster randomized controlled trial	2019	BMC Public Health	Sanchez, Zila M. and Valente, Juliana Y. and Pereira, Ana Paula Dias and Cogo-Moreira, Hugo and Melo, MÃ¡rcia H.S. and Caetano, Sheila C. and Mari, Jair J.	drop
754	786020949	Hidden Protections: Identifying Social Norms Associated with Child Abuse, Sexual Abuse, and Neglect	2019	Child and Adolescent Social Work Journal	Klika, J. Bart and Haboush-Deloye, Amanda and Linkenbach, Jeff	drop
755	786020950	Bystander Program Effectiveness to Reduce Violence Acceptance: RCT in High Schools	2019	Journal of Family Violence	Coker, Ann L. and Bush, Heather M. and Brancato, Candace J. and Clear, Emily R. and Recktenwald, Eileen A.	retrieved
756	786020951	Coaching Teachers to Detect, Prevent, and Respond to Bullying Using Mixed Reality Simulation: an Efficacy Study in Middle Schools	2019	International Journal of Bullying Prevention	Pas, Elise T. and Waasdorp, Tracy E. and Bradshaw, Catherine P.	retrieved
757	786020952	Evaluation of a Bystander-Focused Interpersonal Violence Prevention Program with High School Students	2019	Prevention Science	Edwards, Katie M. and Banyard, Victoria L. and Sessarego, Stephanie N. and Waterman, Emily A. and Mitchell, Kimberly J. and Chang, Hong	retrieved
758	786020953	Evaluation of a Whole-School Change Intervention: Findings from a Two-Year Cluster-Randomized Trial of the Restorative Practices Intervention	2019	Journal of Youth and Adolescence	Acosta, Joie and Chinman, Matthew and Ebener, Patricia and Malone, Patrick S. and Phillips, Andrea and Wilks, Asa	retrieved
759	786020954	Measurement of Bystander Actions in Violence Intervention Evaluation: Opportunities and Challenges	2019	Current Epidemiology Reports	Bush, Heather M. and Bell, Samuel C. and Coker, Ann L.	drop
760	786020955	A protocol for a cluster-randomized controlled trial testing an empowerment intervention to prevent sexual assault in upper primary school adolescents in the informal settlements of Nairobi, Kenya	2019	BMC Public Health	Sarnquist, Clea and Kang, Jennifer Lee and Amuyunzu-Nyamongo, Mary and Oguda, Gabriel and Otieno, Dorothy and Mboya, Benjamin and Omondi, Nancy and Kipkirui, Duncan and Baiocchi, Michael	drop
761	786020956	A Randomized, Controlled Trial of the Impact of the Couple CARE for Parents of Newborns Program on the Prevention of Intimate Partner Violence and Relationship Problems	2019	Prevention Science	Heyman, Richard E. and Slep, Amy M.Smith and Lorber, Michael F. and Mitnick, Danielle M. and Xu, Shu and Baucom, Katherine J.W. and Halford, W. Kim and Niolon, Phyllis Holditch	drop
762	786020957	Protocol for a process evaluation of a cluster randomized controlled trial of the Learning Club intervention for women's health, and infant's health and development in rural Vietnam	2019	BMC Health Services Research	Fisher, Jane and Nguyen, Trang and Tran, Thach Duc and Tran, Ha and Tran, Tuan and Luchters, Stanley and Hipgrave, David and Hanieh, Sarah and Biggs, Beverley Ann	drop
763	786020958	Overt Perceived Discrimination and Racial Microaggressions and their Association with Health Risk Behaviors among a Sample of Urban American Indian/Alaska Native Adolescents	2019	Journal of Racial and Ethnic Health Disparities	Dickerson, Daniel L. and Brown, Ryan A. and Klein, David J. and Agniel, Denis and Johnson, Carrie and Dâ€™Amico, Elizabeth J.	drop
764	786020959	Social and Emotional Adjustment Across Aggressor/Victim Subgroups: Are Aggressive-Victims Distinct?	2019	Journal of Youth and Adolescence	Oâ€™Connor, Kelly E. and Farrell, Albert D. and Kliewer, Wendy and Lepore, Stephen J.	drop
765	786020960	Psychological treatments for depression among women experiencing intimate partner violence: findings from a randomized controlled trial for behavioral activation in Goa, India	2019	Archives of Women's Mental Health	Patel, Anushka Rajesh and Weobong, Benedict and Patel, Vikram Harshad and Singla, Daisy Radha	drop
766	786020961	Psychological and Physical Intimate Partner Violence and Maternal Depressive Symptoms during the Pre- and Post-Partum Period among Women Living with HIV in Rural South Africa	2020	Journal of Family Violence	Rodriguez, Violeta J. and Shaffer, Anne and Lee, Tae Kyoung and Peltzer, Karl and Weiss, Stephen Marshall and Jones, Deborah Lynne	drop
767	786020962	Outcomes from a Randomized Controlled Trial of the Relief Nursery Program	2020	Prevention Science	Eddy, J. Mark and Shortt, Joann Wu and Martinez, Charles R. and Holmes, Alice and Wheeler, Alice and Gau, Jeff and Seeley, John and Grossman, Jean	drop
768	786020963	Intimate Partner Violence Against Low-Income Women in Mexico City and Associations with Child School Attendance: A Latent Class Analysis Using Cross-sectional Data	2020	Maternal and Child Health Journal	Scolese, Anna and Willie, Tiara C. and Falb, Kathryn L. and Sipsma, Heather and Campos, Paola Abril and Olavarrieta, Claudia Diaz and Gupta, Jhumka	drop
769	786020964	Individual and Relationship Predictors of Couple-Level Sexual Concurrency in Heterosexual South African Couples	2020	Archives of Sexual Behavior	Belus, Jennifer M. and Baucom, Donald H. and Wechsberg, Wendee M.	drop
770	786020965	The Effects of a Health Careâ€“Based Brief Intervention on Dating Abuse Perpetration: Results of a Randomized Controlled Trial	2020	Prevention Science	Rothman, Emily F. and Stuart, Gregory L. and Heeren, Timothy and Paruk, Jennifer and Bair-Merritt, Megan	drop
771	786020966	Preventing College Sexual Victimization by Reducing Hookups: a Randomized Controlled Trial of a Personalized Normative Feedback Intervention	2020	Prevention Science	Testa, Maria and Livingston, Jennifer A. and Wang, Weijun and Lewis, Melissa A.	drop
772	786020967	Bystander Program Effectiveness to Reduce Violence and Violence Acceptance Within Sexual Minority Male and Female High School Students Using a Cluster RCT	2020	Prevention Science	Coker, Ann L. and Bush, Heather M. and Clear, Emily R. and Brancato, Candace J. and McCauley, Heather L.	drop
773	786020968	SAFE: An eHealth intervention for women experiencing intimate partner violence - Study protocol for a randomized controlled trial, process evaluation and open feasibility study	2020	BMC Public Health	Van Gelder, N. E. and Van Rosmalen-Nooijens, K. A.W.L. and A Ligthart, S. and Prins, J. B. and Oertelt-Prigione, S. and Lagro-Janssen, A. L.M.	drop
774	786020969	A study protocol to assess the feasibility of conducting an evaluation trial of the ADVANCE integrated intervention to address both substance use and intimate partner abuse perpetration to men in substance use treatment	2020	Pilot and Feasibility Studies	Gilchrist, Gail and Landau, Sabine and Radcliffe, Polly and McMurran, Mary and Feder, Gene and Easton, Caroline and Parrott, Steve and Kirkpatrick, Sara and Henderson, Juliet and Potts, Laura and Stephens-Lewis, Danielle and Johnson, Amy and Love, Beverly and Halliwell, Gemma and Dheensa, Sandi and Berbary, Cassandra and Li, Jinshuo and Strang, John and Gilchrist, Elizabeth	drop
775	786020970	Patriarchy and gender-inequitable attitudes as drivers of intimate partner violence against women in the central region of Ghana	2020	BMC Public Health	Sikweyiya, Yandisa and Addo-Lartey, Adolphina Addoley and Alangea, Deda Ogum and Dako-Gyeke, Phyllis and Chirwa, Esnat D. and Coker-Appiah, Dorcas and Adanu, Richard M.K. and Jewkes, Rachel	drop
776	786020971	The Effects of Practitioner-Delivered School-Based Mental Health on Aggression and Violence Victimization in Middle Schoolers	2020	School Mental Health	Morgan-Lopez, Antonio A. and Saavedra, Lissette M. and Yaros, Anna C. and Trudeau, James V. and Buben, Alex	retrieved
777	786020972	Development and validation of the LoVI: The Laws on Violence against women and girls Index	2020	BMC International Health and Human Rights	Yount, Kathryn M. and Lewis, Patricia C. and Clark, Cari Jo and Heise, Lori and Naved, Ruchira T. and Maxwell, Lauren	drop
778	786020973	Impact of a Training Programme on Police Attitudes Towards Victims of Rape: a Randomised Controlled Trial	2020	Cambridge Journal of Evidence-Based Policing	McKee, Zoe and Mueller-Johnson, Katrin and Strang, Heather	drop
779	786020974	Sharing reports about domestic violence and abuse with general practitioners: A qualitative interview study	2020	BMC Family Practice	Pitt, Katherine and Dheensa, Sandi and Feder, Gene and Johnson, Emma and Man, Mei See and Roy, Jessica and Williamson, Emma and Szilassy, Eszter	drop
780	786020975	Creating Supportive Contexts for Early Adolescents during the First Year of Middle School: Impact of a Developmentally Responsive Multi-Component Intervention	2020	Journal of Youth and Adolescence	Dawes, Molly and Farmer, Thomas and Hamm, Jill and Lee, David and Norwalk, Kate and Sterrett, Brittany and Lambert, Kerrylin	retrieved
781	786020976	Increasing Family Safety and Decreasing Parental Stress and Childâ€™s Social-Emotional Problems with Resolutions Approach: a Single-Case Experimental Design Study Protocol	2020	Journal of Family Violence	Sepers, Annemariek J.W. and van der Werff, Vera and de Roos, Carlijn and Mooren, Trudy and Maric, Marija	drop
782	786020977	The Effectiveness of the KiVa Bullying Prevention Program in Wales, UK: Results from a Pragmatic Cluster Randomized Controlled Trial	2020	Prevention Science	Axford, Nick and Bjornstad, Gretchen and Clarkson, Suzy and Ukoumunne, Obioha C. and Wrigley, Zoe and Matthews, Justin and Berry, Vashti and Hutchings, Judy	drop
783	786020978	Sex Differences in Problem Alcohol Use in High School as a Function of Recent Sexual Violence Victimization or Perpetration	2020	Journal of Family Violence	Badour, Christal L. and Bell, Samuel C. and Clear, Emily R. and Bush, Heather M. and Coker, Ann L.	drop
784	786020979	Evaluation of a Statewide Implementation of Fathers for Change: a Fathering Intervention for Families Impacted by Partner Violence	2020	Journal of Family Violence	Stover, Carla Smith and Beebe, Rebecca and Clough, Meghan and DiVietro, Susie and Madigan, Linda and Grasso, Damion J.	drop
785	786020980	Patterns of Dating Violence Moderate the Effect of Child Maltreatment on Suicide Risk among Disadvantaged Minority Female Adolescents with Depressive Symptoms	2021	Journal of Family Violence	Adams, Tangeria R. and Handley, Elizabeth D. and Warmingham, Jennifer M. and Manly, Jody Todd and Cicchetti, Dante and Toth, Sheree L.	drop
786	786020981	Preventing Intimate Partner Violence Among Teen Mothers: A Pilot Study	2021	Journal of Child and Family Studies	Kan, Marni L. and Palen, Lori Ann and Hill, Jennifer L. and Herrman, Judith W. and Williams, Jessica D. and Feinberg, Mark E.	drop
787	786020982	Effects of the Dating MattersÂ® Comprehensive Prevention Model on Health- and Delinquency-Related Risk Behaviors in Middle School Youth: a Cluster-Randomized Controlled Trial	2021	Prevention Science	Estefan, Lianne Fuino and Vivolo-Kantor, Alana M. and Niolon, Phyllis Holditch and Le, Vi D. and Tracy, Allison J. and Little, Todd D. and DeGue, Sarah and Latzman, Natasha E. and Tharp, Andra and Lang, Kyle M. and McIntosh, Wendy Li Kam Wa	drop
788	786020983	Introduction to a Special Section on the Effects of the Dating Matters Model on Secondary Outcomes: Results from a Comparative Effectiveness Cluster Randomized Controlled Trial	2021	Prevention Science	Niolon, Phyllis Holditch	drop
789	786020984	Effects of Dating MattersÂ® on Sexual Violence and Sexual Harassment Outcomes among Middle School Youth: a Cluster-Randomized Controlled Trial	2021	Prevention Science	DeGue, Sarah and Niolon, Phyllis Holditch and Estefan, Lianne Fuino and Tracy, Allison J. and Le, Vi D. and Vivolo-Kantor, Alana M. and Little, Todd D. and Latzman, Natasha E. and Tharp, Andra and Lang, Kyle M. and Taylor, Bruce	drop
790	786020985	Middle School Effects of the Dating MattersÂ® Comprehensive Teen Dating Violence Prevention Model on Physical Violence, Bullying, and Cyberbullying: a Cluster-Randomized Controlled Trial	2021	Prevention Science	Vivolo-Kantor, Alana M. and Niolon, Phyllis Holditch and Estefan, Lianne Fuino and Le, Vi Donna and Tracy, Allison J. and Latzman, Natasha E. and Little, Todd D. and Lang, Kyle M. and DeGue, Sarah and Tharp, Andra Teten	drop
791	786020986	Narrative Exposure Therapy versus treatment as usual in a sample of trauma survivors who live under ongoing threat of violence in Rio de Janeiro, Brazil: study protocol for a randomised controlled trial	2021	Trials	Serpeloni, Fernanda and Narrog, Jeanine Arabella and GonÃ§alves de Assis, Simone and Quintes Avanci, Joviana and Carleial, Samuel and Koebach, Anke	drop
792	786020987	Neural changes following a body-oriented resilience therapy with elements of kickboxing for individuals with a psychotic disorder: a randomized controlled trial	2021	European Archives of Psychiatry and Clinical Neuroscience	van der Stouwe, Elisabeth C.D. and Pijnenborg, Gerdina H.M. and Opmeer, Esther M. and de Vries, Bertine and Marsman, Jan Bernard C. and Aleman, AndrÃ© and van Busschbach, Jooske T.	retrieved
793	786020988	The efficacy of a targeted PREVENTION programme for addictive behaviour (PREVENTURE) among vulnerable ADOlescents in France - study procotol	2021	BMC Public Health	guillou-landreat, morgane and Tahmazov, Elkhan and Benoit, Schreck and Grall-bronnec, Marie and Conrod, Patricia and Livet, Audrey and Nowak, Emmanuel and Le Reste, Jean Yves	drop
794	786020989	Intimate partner violence against women on the Colombia Ecuador border: a mixed-methods analysis of the liminal migrant experience	2021	Conflict and Health	Keating, Colleen and Treves-Kagan, Sarah and Buller, Ana Maria	drop
795	786020990	Effect of cognitive-behavioral therapy on domestic violence and its consequences in transgender youth: a randomized clinical trial, parallel group study	2021	BMC Psychiatry	Damanpak-Rizi, Mahdieh and Farnam, Farnaz and Khodakhah, Parisa	drop
796	786020991	Is Adolescent Alcohol Use Linked to Spikes in Aggressive Behaviour? A Growth Curve Analysis	2021	Prevention Science	Lawler, Siobhan M. and Stapinski, Lexine A. and Barrett, Emma L. and Newton, Nicola C. and Sunderland, Matthew and Slade, Tim and Teesson, Maree	drop
797	786020992	Keepinâ€™ It REALâ€”Mantente REAL in Mexico: a Cluster Randomized Controlled Trial of a Culturally Adapted Substance Use Prevention Curriculum for Early Adolescents	2021	Prevention Science	Kulis, Stephen S. and Marsiglia, Flavio F. and Medina-Mora, Maria Elena and NuÃ±o-GutiÃ©rrez, Bertha L. and Corona, Maria Dolores and Ayers, Stephanie L.	drop
798	786020993	Childhood Physical Abuse and Antisocial Traits: Mediating Role of Posttraumatic Stress Symptom Clusters	2021	Journal of Child and Adolescent Trauma	Harris, Catherine E. and Allbaugh, Lucy J. and Kaslow, Nadine J.	drop
799	786020994	Does #Tamojunto alter the dynamic between drug use and school violence among youth? Secondary analysis from a large cluster-randomized trial	2021	European Child and Adolescent Psychiatry	Cogo-Moreira, Hugo and GusmÃµes, Julia D. and Valente, Juliana Y. and Eid, Michael and Sanchez, Zila M.	drop
800	786020995	Cognitive Flexibility and Reaction Time Improvements After Cognitive Training Designed for Men Perpetrators of Intimate Partner Violence: Results of a Pilot Randomized Controlled Trial	2021	Journal of Family Violence	Romero-MartÃ­nez and Santirso, F. and Lila, M. and Comes-Fayos, J. and Moya-Albiol, L.	drop
801	786020996	Exploring the Association Between Bullying Victimization and Suicidal Thoughts Through Theoretical Frameworks of Suicide	2021	International Journal of Bullying Prevention	Gunn, John F. and Goldstein, Sara E.	drop
802	786020997	Treating posttraumatic stress disorder in substance use disorder patients with co-occurring posttraumatic stress disorder: study protocol for a randomized controlled trial to compare the effectiveness of different types and timings of treatment	2021	BMC Psychiatry	Lortye, Sera A. and Will, Joanne P. and Marquenie, Loes A. and Goudriaan, Anna E. and Arntz, Arnoud and de Waal, Marleen M.	drop
803	786020998	Examining the effectiveness of Gatewayâ€”an out-of-court community-based intervention to reduce recidivism and improve the health and well-being of young adults committing low-level offences: study protocol for a randomised controlled trial	2021	Trials	Cochrane, A. and Booth, A. and Walker, I. and Morgan, S. and Mitchell, A. and Barlow-Pay, M. and Hewitt, C. and Taylor, B. and Chapman, C. and Raftery, J. and Fleming, J. and Torgerson, D. and Parkes, J.	drop
804	786020999	The Preventing Relational Aggression in Schools Everyday (PRAISE) Program: Adaptations to Overcome Subgroup Differences in Program Benefits	2022	Prevention Science	Waasdorp, Tracy Evian and Paskewich, Brooke S. and Waanders, Christine and Fu, Rui and Leff, Stephen S.	retrieved
805	786021000	A technology-based intervention to improve safety, mental health and empowerment outcomes for immigrant women with intimate partner violence experiences: itâ€™s weWomen plus sequential multiple assignment randomized trial (SMART) protocol	2021	BMC Public Health	Sabri, Bushra and Glass, Nancy and Murray, Sarah and Perrin, Nancy and Case, James R. and Campbell, Jacquelyn C.	drop
806	786021001	Sex in the Context of Substance Use: A Study of Perceived Benefits and Risks, Boundaries, and Behaviors among Adolescents Participating in an Internet-Based Intervention	2021	Archives of Sexual Behavior	Brady, Sonya S. and Jefferson, Suzanne C. and Saliares, Ellen and Porta, Carolyn M. and Patrick, Megan E.	drop
807	786021002	How to Treat Childhood Sexual Abuse Related PTSD Accompanied by Risky Sexual Behavior: A Case Study on the Use of Dialectical Behavior Therapy for Posttraumatic Stress Disorder (DBT-PTSD)	2021	Journal of Child and Adolescent Trauma	Steil, Regina and Schneider, Angelina and Schwartzkopff, Laura	drop
808	786021003	Evaluation of the One Love Escalation Workshop for Dating Abuse Prevention: a Randomized Controlled Trial Pilot Study with a Sample of US Navy Sailors	2021	Prevention Science	Rothman, Emily F. and Campbell, Julia K. and Quinn, Emily and Smith, Sonia and Xuan, Ziming	drop
809	786021004	Emotional School Engagement and Psychiatric Symptoms among 6â€“9-Year-old Children with an Immigrant Background in the First Years of School in Finland	2021	Child Psychiatry and Human Development	Parviainen, Heidi and Santalahti, PÃ¤ivi and Kiviruusu, Olli	drop
810	786021005	Family Conflict and Violence by Persons with Serious Mental Illness: How Clinicians Can Intervene During the COVID-19 Pandemic and Beyond	2022	Clinical Social Work Journal	Labrum, Travis and Newhill, Christina and Simonsson, Peter and Flores, Ana T.	drop
811	786021006	Sexual Minority Status, Bullying Exposure, Emotion Regulation Difficulties, and Delinquency Among Court-Involved Adolescent Girls	2021	Journal of Youth and Adolescence	Barnett, Andrew P. and Houck, Christopher D. and Barker, David and Rizzo, Christie J.	drop
812	786021007	An evaluation of a group treatment approach for children who have witnessed wife abuse	1995	Journal of Family Violence	Wagar, Janet M. and Rodway, Margaret R.	drop
813	786021008	The efficacy of high impact incarceration: A correctional treatment outcome study	1998	Journal of Police and Criminal Psychology	Fullard, David Anthony	drop
814	786021009	Coordinated community intervention for domestic abusers: Intervention system involvement and criminal recidivism	1998	Journal of Family Violence	Murphy, Christopher M. and Musser, Peter H. and Maton, Kenneth I.	drop
815	786021010	The impact of sentencing options on recidivism among domestic violence offenders: A case study	2000	American Journal of Criminal Justice	Gross, Melissa and Cramer, Elizabeth P. and Forte, Janett and Gordon, Jill A. and Kunkel, Tara and Moriarty, Laura J.	drop
816	786021011	Efficacy of Emotion Focused Therapy for Adult Survivors of Child Abuse: A Preliminary Study	2001	Journal of Traumatic Stress	Paivio, Sandra C. and Nieuwenhuis, James A.	drop
817	786021012	Future directions for violence against women and reproductive health: science, prevention, and action.	2000	Maternal and child health journal	Campbell, J. C. and Moracco, K. E. and Saltzman, L. E.	drop
818	786021013	The trauma recovery and empowerment model (TREM): Conceptual and practical issues in a group intervention for women	2002	Community Mental Health Journal	Fallot, Roger D. and Harris, Maxine	drop
819	786021014	Impact of the RIPP Violence Prevention Program on Rural Middle School Students	2003	Journal of Primary Prevention	Farrell, Albert D. and Valois, Robert F. and Meyer, Aleta L. and Tidwell, Ritchie P.	retrieved
820	786021015	Counseling and climate change as treatment modalities for bullying in school	2003	International Journal for the Advancement of Counselling	Greene, Michael B.	drop
821	786021016	Homelessness among families, children, and adolescents: An ecological-developmental perspective	2004	Clinical Child and Family Psychology Review	Haber, Mason G. and Toro, Paul A.	drop
822	786021017	Tangled in a web of affiliation: Social support networks of dually diagnosed women who are trauma survivors	2005	Journal of Behavioral Health Services and Research	Savage, Andrea and Russell, Lisa A.	drop
823	786021018	The assessment of trauma history in women with co-occurring substance abuse and mental disorders and a history of interpersonal violence	2005	Journal of Behavioral Health Services and Research	McHugo, Gregory J. and Caspi, Yael and Kammerer, Nina and Mazelis, Ruta and Jackson, Elizabeth W. and Russell, Lisa and Clark, Colleen and Liebschutz, Jane and Kimerling, Rachel	drop
824	786021019	The working alliance in intervention for partner violence perpetrators: Recent research and theory	2007	Journal of Family Violence	Taft, Casey T. and Murphy, Christopher M.	drop
825	786021020	Ethnic and gender differences in offending patterns: Examining family group conferencing interventions among at-risk adolescents	2006	Child and Adolescent Social Work Journal	Baffour, Tiffany D.	drop
826	786021021	Interpersonal violence in alcohol complicated marital relationships (a study from India)	2008	Journal of Family Violence	Stanley, Selwyn	drop
827	786021022	College Studentsâ€™ Punishment Perceptions of Online Solicitation of Children for Sex	2008	American Journal of Criminal Justice	Wolfe, Scott E. and Higgins, George E.	drop
828	786021023	Conducting cost benefit analyses in criminal justice evaluations: Do we dare?	2009	European Journal on Criminal Policy and Research	Zedlewski, Edwin W.	drop
829	786021024	Effects of Motivational Enhancement on Immediate Outcomes of Batterer Intervention	2011	Journal of Family Violence	Scott, Katreena and King, Colin and McGinn, Holly and Hosseini, Narges	drop
830	786021025	Bully/Victim Problems Among Preschool Children: A Review of Current Research Evidence	2011	Educational Psychology Review	Vlachou, Maria and Andreou, Eleni and Botsoglou, Kafenia and Didaskalou, Eleni	drop
831	786021026	"FearNot!": A computer-based anti-bullying-programme designed to foster peer intervention	2011	European Journal of Psychology of Education	Vannini, Natalie and Watson, Scott and Dautenhahn, Kerstin and Enz, Sibylle and Sapouna, Maria and Wolke, Dieter and Woods, Sarah and Hall, Lynne and Paiva, Ana and AndrÃ©, Elizabeth and Aylett, Ruth and Schneider, Wolfgang	drop
832	786021027	Durability of peace education effects in the shadow of conflict	2011	Social Psychology of Education	Rosen, Yigal and Salomon, Gavriel	drop
833	786021028	Dialogical Views on Partner Abuser Treatment: Balancing Confrontation and Support	2012	Journal of Family Violence	Rasanen, Eveliina and Holma, Juha and Seikkula, Jaakko	drop
834	786021029	An evaluation of the adults and children together (ACT) against violence parents raising safe kids program	2011	Journal of Primary Prevention	Portwood, Sharon G. and Lambert, Richard G. and Abrams, Lyndon P. and Nelson, Ellissa Brooks	drop
835	786021030	Protection Orders in the European Member States: Where Do We Stand and Where Do We Go from Here?	2012	European Journal on Criminal Policy and Research	van der Aa, Suzan	drop
836	786021031	Family Closeness and Domestic Abuse Among Caribbean and South American Women in South Florida	2012	Journal of Family Violence	Aysa-Lastra, Maria and Rojas, Patria and Dillon, Frank R. and Duan, Rui and de la Rosa, Mario	drop
837	786021032	Dating Violence, Bullying, and Sexual Harassment: Longitudinal Profiles and Transitions Over Time	2013	Journal of Youth and Adolescence	Miller, Shari and Williams, Jason and Cutbush, Stacey and Gibbs, Deborah and Clinton-Sherrod, Monique and Jones, Sarah	drop
838	786021033	Clinical care for sexual assault survivors multimedia training: A mixed-methods study of effect on healthcare providers' attitudes, knowledge, confidence, and practice in humanitarian settings	2013	Conflict and Health	Smith, Janel R. and Ho, Lara S. and Langston, Anne and Mankani, Neha and Shivshanker, Anjuli and Perera, Dhammika	drop
839	786021034	Methodological Challenges Examining Subgroup Differences: Examples from Universal School-based Youth Violence Prevention Trials	2013	Prevention Science	Farrell, Albert D. and Henry, David B. and Bettencourt, Amie	drop
840	786021035	Sex Differences in Perceived Weight-Based Employment Discrimination When Weight Discrimination is Illegal	2013	Employee Responsibilities and Rights Journal	Roehling, Mark V. and Roehling, Patricia V. and Wagstaff, Maria Fernanda	drop
841	786021036	Prevention of sexual abuse: Improved information is crucial	2014	Child and Adolescent Psychiatry and Mental Health	Zollner, Hans S.J. and Fuchs, Katharina A. and Fegert, JÃ¶rg M.	drop
842	786021037	Equine Facilitated Therapy with Children and Adolescents Who Have Been Sexually Abused: A Program Evaluation Study	2014	Journal of Child and Family Studies	Kemp, Kathleen and Signal, Tania and Botros, Helena and Taylor, Nik and Prentice, Kathy	drop
843	786021038	What Can be Done About High-Risk Perpetrators of Domestic Violence?	2014	Journal of Family Violence	Juodis, Marcus and Starzomski, Andrew and Porter, Stephen and Woodworth, Michael	drop
844	786021039	Trauma-focused treatment in a state system of care: Is it worth the cost?	2014	Administration and Policy in Mental Health and Mental Health Services Research	Greer, Delilah and Grasso, Damion J. and Cohen, Andrew and Webb, Charles	drop
845	786021040	The Impact of Depression on Driver Performance	2014	International Journal of Mental Health and Addiction	Wickens, Christine M. and Smart, Reginald G. and Mann, Robert E.	drop
846	786021041	Factors Contributing to Intimate Partner Violence among Men in Kerala, India	2014	Journal of Family Violence	Jin, Xiaochun and Doukas, Ashley and Beiting, Magdalen and Viksman, Ann	drop
847	786021042	Judgments of Sexual Harassment Court Case Summaries	2014	Journal of Business and Psychology	Kath, Lisa M. and Bulger, Carrie A. and Holzworth, R. James and Galleta, J. Andrew	drop
848	786021043	Does enhanced rapport-building alter the dynamics of investigative interviews with suspected victims of intra-familial abuse?	2015	Journal of Police and Criminal Psychology	Hershkowitz, Irit and Lamb, Michael E. and Katz, Carmit and Malloy, Lindsay C.	drop
849	786021044	From Violence Exposure to Development of Sexual Risk in Low-Income Urban Girls: The Role of Psychopathology	2015	Child Psychiatry and Human Development	Wilson, Helen W. and Pettineo, Laura and Edmonds, Alexus and Goodman, Elizabeth A. and Emerson, Erin and Donenberg, Geri R.	drop
850	786021045	Emotional and Physiological Desensitization to Real-Life and Movie Violence	2015	Journal of Youth and Adolescence	Mrug, Sylvie and Madan, Anjana and Cook, Edwin W. and Wright, Rex A.	drop
851	786021046	Predicting Bystander Behavior to Prevent Sexual Assault on College Campuses: The Role of Self-Efficacy and Intent	2015	American Journal of Community Psychology	McMahon, Sarah and Peterson, N. Andrew and Winter, Samantha C. and Palmer, Jane E. and Postmus, Judy L. and Koenick, Ruth Anne	drop
852	786021047	No-Contact Orders, Victim Safety, and Offender Recidivism in Cases of Misdemeanor Criminal Domestic Violence: A Randomized Experiment	2015	American Journal of Criminal Justice	Brame, Robert and Kaukinen, Catherine and Gover, Angela R. and Lattimore, Pamela K.	drop
853	786021048	The Effect of Teach One Reach One (TORO) on Youth Acceptance of Couple Violence	2015	Journal of Child and Family Studies	Ritchwood, Tiarney D. and Albritton, Tashuna and Akers, Aletha Y. and Dave, Gaurav and Carthron, Dana and Adimora, Adaora A. and Corbie-Smith, Giselle and Isler, M. R. and Sallah, S. and Wynn, M. and Stith, D.	drop
854	786021049	Impact of a participatory cyber crime prevention programme on secondary school studentsâ€™ attainment in crime prevention concepts in civic education and social studies	2015	Education and Information Technologies	Amosun, Peter Adewale and Ige, Olugbenga Adedayo and Choo, Kim Kwang Raymond	drop
855	786021050	The Bullying Literature Project: Using Childrenâ€™s Literature to Promote Prosocial Behavior and Social-Emotional Outcomes Among Elementary School Students	2015	Contemporary School Psychology	Wang, Cixin and Couch, Lauren and Rodriguez, Geovanna Rosas and Lee, Catherine	retrieved
856	786021051	Constructing â€œPackagesâ€ of Evidence-Based Programs to Prevent Youth Violence: Processes and Illustrative Examples From the CDCâ€™s Youth Violence Prevention Centers	2016	Journal of Primary Prevention	Kingston, Beverly and Bacallao, Martica and Smokowski, Paul and Sullivan, Terri and Sutherland, Kevin	drop
857	786021052	Magnitude and factors associated with intimate partner violence in mainland Tanzania	2016	BMC Public Health	Kazaura, Method R. and Ezekiel, Mangi J. and Chitama, Dereck	drop
858	786021053	THRIVES: Using the best evidence to prevent violence against children	2016	Journal of Public Health Policy	Hillis, Susan and Mercy, James and Saul, Janet and Gleckel, Jessie and Abad, Neetu and Kress, Howard	drop
859	786021054	Policing Schools: Examining the Impact of Place Management Activities on School Violence	2016	American Journal of Criminal Justice	Swartz, Kristin and Osborne, Dustin L. and Dawson-Edwards, Cherie and Higgins, George E.	drop
860	786021055	Teen Dating Violence, Sexual Harassment, and Bullying Among Middle School Students: Examining Mediation and Moderated Mediation by Gender	2016	Prevention Science	Cutbush, Stacey and Williams, Jason and Miller, Shari	drop
861	786021056	The â€œcare package,â€ prison domestic violence programs and recidivism: a quasi-experimental study	2016	Journal of Experimental Criminology	Hasisi, Badi and Shoham, Efrat and Weisburd, David and Haviv, Noam and Zelig, Anat	drop
862	786021057	Pathways from Childhood Adversity to Problem Behaviors in Young Adulthood: The Mediating Role of Adolescentsâ€™ Future Expectations	2017	Journal of Youth and Adolescence	Brumley, Lauren D. and Jaffee, Sara R. and Brumley, Benjamin P.	drop
863	786021058	The effects of different saturation levels of the Shifting Boundaries intervention on preventing adolescent relationship abuse and sexual harassment	2017	Journal of Experimental Criminology	Taylor, Bruce G. and Mumford, Elizabeth A. and Liu, Weiwei and Stein, Nan D.	drop
864	786021059	Prevention of Aggression, Violence, and Mental Health Problems in Childhood and Adolescence: Innovative and Sustainable Approaches from Around the World: Introduction and Overview	2017	Prevention Science	Guerra, Nancy and Duryea, Suzanne	drop
865	786021060	True Love: Effectiveness of a School-Based Program to Reduce Dating Violence Among Adolescents in Mexico City	2017	Prevention Science	Sosa-Rubi, Sandra G. and Saavedra-Avendano, Biani and Piras, Claudia and Van Buren, S. Janae and Bautista-Arredondo, Sergio	drop
866	786021061	Multilevel Modeling in Family Violence Research	2018	Journal of Family Violence	Rose, Roderick A.	drop
867	786021062	Benefits and Challenges of Using Life History Calendars to Research Intimate Partner Violence	2018	Journal of Family Violence	Hayes, Brittany E.	drop
868	786021063	Stability and Change of Adolescentsâ€™ Aggressive Behavior in Residential Youth Care	2018	Child and Youth Care Forum	Eltink, E. M.A. and Ten Hoeve, J. and De Jongh, T. and Van der Helm, G. H.P. and Wissink, I. B. and Stams, G. J.J.M.	drop
869	786021064	The HERrespect intervention to address violence against female garment workers in Bangladesh: Study protocol for a quasi-experimental trial	2018	BMC Public Health	Al Mamun, Mahfuz and Parvin, Kausar and Yu, Marat and Wan, Jessica and Willan, Samantha and Gibbs, Andrew and Jewkes, Rachel and Naved, Ruchira Tabassum	drop
870	786021065	Lights4Violence: A quasi-experimental educational intervention in six European countries to promote positive relationships among adolescents	2019	BMC Public Health	Vives-Cases, C. and Davo-Blanes, M. C. and Ferrer-Cascales, R. and Sanz-Barbero, B. and Albaladejo-BlÃ¡zquez, N. and SÃ¡nchez-San Segundo, M. and Lillo-Crespo, M. and Bowes, N. and Neves, S. and Mocanu, V. and Carausu, E. M. and Pyzalski, J. and Forjaz, M. J. and Chmura-Rutkowska, I. and Vieira, C. P. and Corradi, C.	drop
871	786021066	Economic Self-Sufficiency among Women Who Experienced Intimate Partner Violence and Received Civil Legal Services	2018	Journal of Family Violence	Hartley, Carolyn Copps and Renner, Lynette M.	drop
872	786021067	Family Enrichment Adventure Therapy: A Mixed Methods Study Examining the Impact of Trauma-Informed Adventure Therapy on Children and Families Affected by Abuse	2019	Journal of Child and Adolescent Trauma	Norton, Christine Lynn and Tucker, Anita and Farnham-Stratton, Mollie and Borroel, Federico and Pelletier, Annette	drop
873	786021068	Cognitive Predictors of Relational and Social Bullying, Overt Aggression, and Interpersonal Maturity in a Late Adolescent Female Sample	2019	International Journal of Bullying Prevention	Crothers, Laura M. and Kolbert, Jered B. and Schmitt, Ara J. and Wells, Daniel S. and Meidl, Christopher and Berbary, Cassandra and Chatlos, Suzannah and Lattanzio, Latitia and Simonds, Rachel and Zebrowski, Meredith and Wadsworth, Jacob and Fidazzo, Angela and Lipinski, John	drop
874	786021069	Youth Engagement, Positive Interethnic Contact, and â€˜Associational Bridgesâ€™: A Quasi-Experimental Investigation of a UK National Youth Engagement Scheme	2019	Journal of Youth and Adolescence	Laurence, James	drop
875	786021070	Bystander Responses to Bullying at Work: The Role of Mode, Type and Relationship to Target	2019	Journal of Business Ethics	Coyne, Iain and Gopaul, Alana Marie and Campbell, Marilyn and PankÃ¡sz, Alexandra and Garland, Robyn and Cousans, Frances	drop
876	786021071	Psychologists and Psychiatrists in Court: What Do They Know About Eyewitness Memory? A Comparison of Experts in Inquisitorial and Adversarial Legal Systems	2019	Journal of Police and Criminal Psychology	Dodier, Olivier and Melinder, Annika and Otgaar, Henry and Payoux, MÃ©lany and Magnussen, Svein	drop
877	786021072	Recognizing a missing senior citizen in relation to experience with the elderly, demographic characteristics, and personality variables	2020	Current Psychology	Gier, Vicki S. and Kreiner, David S.	drop
878	786021073	Norms and Attitudes about Being an Active Bystander: Support for Telling Adults about Seeing Knives or Guns at School among Greater London Youth	2020	Journal of Youth and Adolescence	Perkins, Jessica M. and Perkins, H. Wesley and Craig, David W.	drop
879	786021074	Family Treatment Court-Involved Parentsâ€™ Perceptions of their Substance Use and Parenting	2020	Journal of Child and Family Studies	Sieger, Margaret H.Lloyd and Haswell, Robert	drop
880	786021075	The Opportunity â€“ VAWA 2013 Reauthorization Provides a Natural Experiment for Bystander Efficacy Evaluation	2020	Journal of Family Violence	Bush, Heather M. and Davidov, Danielle and Brancato, Candace J. and Clear, Emily R. and Coker, Ann L.	drop
881	786021076	Examining the effects of legalizing marijuana in Colorado and Washington on clearance rates: a quasi-experimental design	2020	Journal of Experimental Criminology	Jorgensen, Cody and Harper, Alexis J.	drop
882	786021077	High School Bullying and Mental Disorder: an Examination of the Association with Flourishing and Emotional Regulation	2020	International Journal of Bullying Prevention	Romano, Isabella and Butler, Alexandra and Patte, Karen A. and Ferro, Mark A. and Leatherdale, Scott T.	drop
883	786021078	Longitudinal associations between bullying and alcohol use and binge drinking among grade 9 and 10 students in the COMPASS study	2020	Canadian Journal of Public Health	Williams, Gillian C. and Battista, Kate and deGroh, Margaret and Jiang, Ying and Morrison, Howard and Leatherdale, Scott T.	drop
884	786021079	Maternal Support and Physical Dating Violence Perpetration among Disconnected Young Women	2021	Journal of Child and Family Studies	Powell, Terrinieka W. and Latimore, Amanda and Fuentes, Leslie Vanessa Martinez and Marshall, Beth D. and Mendelson, Tamar and Tandon, S. Darius	drop
885	786021080	The Fear of Being Bullied on the School Bus: Perceptions, Correlations, and Sex Differences	2021	International Journal of Bullying Prevention	Walters, Glenn D. and Kremser, Jon and Runell, Lindsey	drop
886	786021081	School Bullying, Mental Health, and Wellbeing in Adolescents: Mediating Impact of Positive Psychological Orientations	2021	Child Indicators Research	Arslan, GÃ¶kmen and Allen, Kelly Ann and Tanhan, Ahmet	drop
887	786021082	Exploring the Immediate Effects of COVID-19 Containment Policies on Crime: an Empirical Analysis of the Short-Term Aftermath in Los Angeles	2021	American Journal of Criminal Justice	Campedelli, Gian Maria and Aziani, Alberto and Favarin, Serena	drop
888	786021083	Hospitality Towards People with Mental Illness in the Church: a Cross-cultural Qualitative Study	2022	Pastoral Psychology	Lehmann, Curtis S. and Whitney, William B. and Un, Jean and Payne, Jennifer S. and Simanjuntak, Maria and Hamilton, Stephen and Worku, Tsegamlak and Fernandez, Nathaniel A.	drop
889	786021084	Relationships of domestic violence with bullying, silencing-the-self, resilience, and self-efficacy: Moderating roles of stress-coping strategies	2022	Current Psychology	KarakuÅŸ, Cansu and GÃ¶ncÃ¼-KÃ¶se, AslÄ±	drop
890	786021085	Fair Teachers, Fair Police? Assessing the Pathways between Perceptions of Teacher and Police Authority in Childhood and Adolescence	2022	Journal of Youth and Adolescence	Nivette, Amy and Obsuth, Ingrid and Ribeaud, Denis and Eisner, Manuel	drop
891	786021086	Clinical Practice with Children and Adolescents Involved in Bullying and Cyberbullying: Gleaning Guidelines from the Literature	2021	Clinical Social Work Journal	Byers, David S. and Mishna, Faye and Solo, Carolyn	drop
892	786021087	Parentsâ€™ Phubbing and Cyberbullying Perpetration Among Adolescents: the Mediation of Anxiety and the Moderation of Zhong-Yong Thinking	2021	International Journal of Mental Health and Addiction	Wei, Hua and Ding, Huimin and Huang, Feng and Zhu, Liyue	drop
893	786021088	Psychometric Parameters of the Cyberbullying Attitude Scale in Brazil	2021	Current Psychology	Cavalcanti, Jaqueline Gomes and de Lima Pinto, Adriele Vieira and Pimentel, Carlos Eduardo and de Melo, LuÃ£ Medeiros Fernandes	drop
894	786021089	Prevalence and Factors Associated with School and Cyberbullying Among Rhode Island Youth	2021	International Journal of Bullying Prevention	Skierkowski-Foster, Dorothy	drop
895	786021090	Social support and cyberbullying for university students: The mediating role of internet addiction and the moderating role of stress	2021	Current Psychology	Chu, Xiaoyuan and Li, Yuan and Wang, Pengcheng and Zeng, Pan and Lei, Li	drop
896	786021091	Does Empathy and Toxic Online Disinhibition Moderate the Longitudinal Association Between Witnessing and Perpetrating Homophobic Cyberbullying?	2021	International Journal of Bullying Prevention	Wright, Michelle F. and Wachs, Sebastian	drop
897	786021092	Risk and Protective Factors in Cyberbullying: the Role of Family, Social Support and Emotion Regulation	2021	International Journal of Bullying Prevention	AratÃ³, N. and ZsidÃ³, A. N. and RivnyÃ¡k, A. and PÃ©ley, B. and LÃ¡badi, B.	drop
898	786021093	Parental attachment and cyberbullying victims: the mediation effect of gelotophobia	2021	Current Psychology	Canestrari, Carla and Arroyo, Gonzalo Del Moral and Carrieri, Angelo and Muzi, Morena and Fermani, Alessandra	drop
899	786021094	Stalked by Our Own Devices: Cyberbullying as a Boundary Crossing Behavior	2021	Postdigital Science and Education	Koole, Marguerite and Clark, Steve and Hellsten-Bzovey, Laurie-Ann and McIntyre, Laureen and Hendry, Brittany	drop
900	786021095	Cyberbullying, Self-control, Information, and Electronic Communication Technologies: Do Adolescents Know How to Exercise Self-control on the Internet?	2021	International Journal of Bullying Prevention	Hoareau, Natacha and BagÃ¨s, CÃ©line and Guerrien, Alain	drop
901	786021096	From Flaming to Incited Crime: Recognising Cyberbullying on Chinese WeChat Account	2021	International Journal for the Semiotics of Law	Zhang, Shaomin	drop
902	786021097	Should Australia have a law against cyberbullying? Problematising the murky legal environment of cyberbullying from perspectives within schools	2021	Australian Educational Researcher	Pennell, Donna and Campbell, Marilyn and Tangen, Donna and Knott, Andrew	drop
903	786021098	Machiavellian Apparatus of Cyberbullying: Its Triggers Igniting Fury With Legal Impacts	2021	International Journal for the Semiotics of Law	Wagner, Anne and Yu, Wei	drop
904	786021099	Context Matters (But Some Contexts Matter More): Disentangling the Influence of Traditional Bullying Victimization on Patterns of Cyberbullying Outcomes	2021	International Journal of Bullying Prevention	Paez, Gabriel R. and Hart, Timothy C.	drop
905	786021100	Conceptualizing the Protective Factors of Cyberbullying Victimization in Korean Adolescents	2021	School Mental Health	Chun, Jong Serl and Lee, Serim and Kim, Jinyung	drop
906	786021101	Benchmarks and Bellwethers in Cyberbullying: the Relational Process of Telling	2021	International Journal of Bullying Prevention	Mishna, Faye and Birze, Arija and Greenblatt, Andrea and Khoury-Kassabri, Mona	drop
907	786021102	Risk Factors of Cyberbullying Perpetration Among School-Aged Children Across 41 Countries: a Perspective of Routine Activity Theory	2021	International Journal of Bullying Prevention	Li, Qingyi and Luo, Yan and Hao, Zhichao and Smith, Brenda and Guo, Yuqi and Tyrone, C.	drop
908	786021103	Cyberbullying, metacognition, and quality of life: preliminary findings from the Longitudinal Adolescent Brain Study (LABS)	2021	Discover Psychology	McLoughlin, Larisa T. and Simcock, Gabrielle and Schwenn, Paul and Beaudequin, Denise and Driver, Christina and Kannis-Dymand, Lee and Lagopoulos, Jim and Hermens, Daniel F.	drop
909	786021104	Cyberbullying in Polish Debate on the BiaÅ‚owieÅ¼a National Forest	2021	International Journal for the Semiotics of Law	Matulewska, Aleksandra and Kic-Drgas, Joanna and Trzaskawka, Paula	drop
910	786021105	The effects of strain and negative emotions on adolescent cyberbullying perpetration: An empirical test of general strain theory	2021	Current Psychology	Wang, Lin and Jiang, Shan	drop
911	786021106	Is Cyberbullying Worse than Traditional Bullying? Examining the Differential Roles of Medium, Publicity, and Anonymity for the Perceived Severity of Bullying	2013	Journal of Youth and Adolescence	Sticca, Fabio and Perren, Sonja	drop
912	786021107	Cyberbullying, help-seeking and mental health in young Australians: implications for public health	2015	International Journal of Public Health	Spears, Barbara A. and Taddeo, Carmel M. and Daly, Anthony L. and Stretton, Alexander and Karklins, Larisa T.	drop
913	786021108	Children's cyberbullying victimization: Associations with social anxiety and social competence in a Spanish sample	2012	Child Indicators Research	Navarro, RaÃºl and Yubero, Santiago and LarraÃ±aga, Elisa and MartÃ­nez, Veronica	drop
914	786021109	Cyberbullying: Insights and age-comparison indicators from a youth-led study in England	2013	Child Indicators Research	Tarapdar, Saima and Kellett, Mary	drop
915	786021110	Cyberbullying among Finnish adolescents - A population-based study	2012	BMC Public Health	Lindfors, Pirjo L. and Kaltiala-Heino, Riittakerttu and RimpelÃ¤, Arja H.	drop
916	786021111	Online gaming and risks predict cyberbullying perpetration and victimization in adolescents	2015	International Journal of Public Health	Chang, Fong Ching and Chiu, Chiung Hui and Miao, Nae Fang and Chen, Ping Hung and Lee, Ching Mei and Huang, Tzu Fu and Pan, Yun Chieh	drop
917	786021112	Does One Size Fit All? Ethnic Differences in Parenting Behaviors and Motivations for Adolescent Engagement in Cyberbullying	2013	Journal of Youth and Adolescence	Shapka, Jennifer D. and Law, Danielle M.	drop
918	786021113	Prevention 2.0: Targeting Cyberbullying @ School	2014	Prevention Science	WÃ¶lfer, Ralf and Schultze-Krumbholz, Anja and Zagorscak, Pavle and JÃ¤kel, Anne and GÃ¶bel, Kristin and Scheithauer, Herbert	retrieved
919	786021114	Forensic implications: Adolescent sexting and cyberbullying	2014	Psychiatric Quarterly	Korenis, Panagiota and Billick, Stephen Bates	drop
920	786021115	Social Influences on Cyberbullying Behaviors Among Middle and High School Students	2013	Journal of Youth and Adolescence	Hinduja, Sameer and Patchin, Justin W.	drop
921	786021116	Exploration of the Cyberbullying Victim/Offender Overlap by Sex	2014	American Journal of Criminal Justice	Marcum, Catherine D. and Higgins, George E. and Freiburger, Tina L. and Ricketts, Melissa L.	drop
922	786021117	The impact of cyberbullying on substance use and mental health in a multiethnic sample	2011	Maternal and Child Health Journal	Goebert, Deborah and Else, Iwalani and Matsu, Courtenay and Chung-Do, Jane and Chang, Janice Y.	drop
923	786021118	Exploring traditional and cyberbullying among Irish adolescents	2015	International Journal of Public Health	Callaghan, Mary and Kelly, Colette and Molcho, Michal	drop
924	786021119	Physical, Social, and Cyberbullying: Relationships with Adolescentsâ€™ Psychosocial Factors	2016	Child Indicators Research	You, Sukkyung and Lee, Yunoug and Kim, Euikyung	drop
925	786021120	Is Cyberbullying Related to Trait or State Anger?	2015	Child Psychiatry and Human Development	Lonigro, Antonia and Schneider, Barry H. and Laghi, Fiorenzo and Baiocco, Roberto and Pallini, Susanna and Brunner, Thomas	drop
926	786021121	Cyberbullying victimization and its association with health across the life course: A canadian population study	2017	Canadian Journal of Public Health	Kim, Soyeon and Boyle, Michael H. and Georgiades, Katholiki	drop
927	786021122	Divergent Perspectives: Exploring a Multiple Informant Approach to Cyberbullying Victimization and Perpetration	2016	European Journal on Criminal Policy and Research	Wegge, Denis and Vandebosch, Heidi and Eggermont, Steven and Van Rossem, Ronan and Walrave, Michel	drop
928	786021123	Comparing cyberbullying and school bullying among school students: prevalence, gender, and grade level differences	2015	Social Psychology of Education	Lapidot-Lefler, Noam and Dolev-Cohen, Michal	drop
929	786021124	The Impact of Cyberbullying and Social Bullying on Optimism, Global and School-Related Happiness and Life Satisfaction Among 10-12-year-old Schoolchildren	2015	Applied Research in Quality of Life	Navarro, RaÃºl and Ruiz-Oliva, Roberto and LarraÃ±aga, Elisa and Yubero, Santiago	drop
930	786021125	Integrating Traditional Bullying and Cyberbullying: Challenges of Definition and Measurement in Adolescents â€“ a Review	2015	Educational Psychology Review	Thomas, Hannah J. and Connor, Jason P. and Scott, James G.	drop
931	786021126	Cyberbullying: a storm in a teacup?	2017	European Child and Adolescent Psychiatry	Wolke, Dieter and Lee, Kirsty and Guy, Alexa	drop
932	786021127	Psychosocial Risk Factors for Involvement in Bullying Behaviors: Empirical Comparison Between Cyberbullying and Social Bullying Victims and Bullies	2015	School Mental Health	Navarro, RaÃºl and Yubero, Santiago and LarraÃ±aga, Elisa	drop
933	786021128	Computer-based communication and cyberbullying involvement in the sample of Arab teenagers	2016	Education and Information Technologies	Heiman, Tali and Olenik-Shemesh, Dorit	drop
934	786021129	The â€œnetâ€ of the Internet: Risk Factors for Cyberbullying among Secondary-School Students in Greece	2016	European Journal on Criminal Policy and Research	Athanasiades, Christina and Baldry, Anna Costanza and Kamariotis, Theocharis and Kostouli, Marialena and Psalti, Anastasia	drop
935	786021130	Individualism-Collectivism Orientations and Coping Styles of Cyberbullying Victims in Chinese Culture	2018	Current Psychology	Hu, Qin and Bernardo, Allan B.I. and Lam, Sut Wan and Cheang, Pou Kuan	drop
936	786021131	BullyBlocker: toward an interdisciplinary approach to identify cyberbullying	2018	Social Network Analysis and Mining	Silva, Yasin N. and Hall, Deborah L. and Rich, Christopher	drop
937	786021132	Exploring Chinese Youthâ€™s Internet Usage and Cyberbullying Behaviors and their Relationship	2018	Asia-Pacific Education Researcher	Li, Jiansheng and Luo, Chuanlan and Lin, Yuyu and Shadiev, Rustam	drop
938	786021133	Cyberbullying among Youth with and without Disabilities	2018	Journal of Child and Adolescent Trauma	Kowalski, Robin M. and Toth, Allison	drop
939	786021134	How do Traditional Bullying and Cyberbullying Victimization Affect Fear and Coping among Students? An Application of General Strain Theory	2018	American Journal of Criminal Justice	Keith, Shelley	drop
940	786021135	Cyberbullying Experiences Among Marginalized Youth: What Do We Know and Where Do We Go Next?	2018	Journal of Child and Adolescent Trauma	Espinoza, Guadalupe and Wright, Michelle	drop
941	786021136	Cyberbullying and Internalizing Difficulties among Indigenous Adolescents in Canada: Beyond the Effect of Traditional Bullying	2018	Journal of Child and Adolescent Trauma	Broll, Ryan and Dunlop, Caely and Crooks, Claire V.	drop
942	786021137	Face-to-Face Bullying, Cyberbullying, and Multiple Forms of Substance Use Among School-Age Adolescents in the USA	2018	School Mental Health	Lee, Jungup and Hong, Jun Sung and Resko, Stella M. and Tripodi, Stephen J.	drop
943	786021138	Relationship between cyberbullying and health-related quality of life in a sample of children and adolescents	2018	Quality of Life Research	GonzÃ¡lez-Cabrera, J. and LeÃ³n-MejÃ­a, A. and Beranuy, M. and GutiÃ©rrez-Ortega, M. and Alvarez-BardÃ³n, A. and Machimbarrena, J. M.	drop
944	786021139	Psychoactive Substance Use and Problematic Internet Use as Predictors of Bullying and Cyberbullying Victimization	2018	International Journal of Mental Health and Addiction	Zsila, Ãgnes and Orosz, GÃ¡bor and KirÃ¡ly, Orsolya and UrbÃ¡n, RÃ³bert and Ujhelyi, Adrienn and JÃ¡rmi, Ã‰va and Griffiths, Mark D. and Elekes, Zsuzsanna and Demetrovics, Zsolt	drop
945	786021140	Cross-national aspects of cyberbullying victimization among 14-17-year-old adolescents across seven European countries	2018	BMC Public Health	Athanasiou, Kalliope and Melegkovits, Eirini and Andrie, Elisabeth K. and Magoulas, Charalampos and Tzavara, Chara K. and Richardson, Clive and Greydanus, Donald and Tsolia, Maria and Tsitsika, Artemis K.	drop
946	786021141	Differences between Preadolescent Victims and Non-Victims of Cyberbullying in Cyber-Relationship Motives and Coping Strategies for Handling Problems with Peers	2018	Current Psychology	Navarro, RaÃºl and LarraÃ±aga, Elisa and Yubero, Santiago	drop
947	786021142	A Cyberbullying Intervention for Hong Kong Chinese College Students	2018	Applied Research in Quality of Life	Leung, Angel Nga Man and Fung, Daniel Chi Lok and Farver, Jo Ann M.	retrieved
948	786021143	Examining the Effectiveness of Academic Scholarship on the Fight Against Cyberbullying and Cyberstalking	2019	American Journal of Criminal Justice	Marcum, Catherine D. and Higgins, George E.	drop
949	786021144	Problematic Online Behaviors among Adolescents and Emerging Adults: Associations between Cyberbullying Perpetration, Problematic Social Media Use, and Psychosocial Factors	2019	International Journal of Mental Health and Addiction	KÄ±rcaburun, Kagan and Kokkinos, Constantinos M. and Demetrovics, Zsolt and KirÃ¡ly, Orsolya and Griffiths, Mark D. and Ã‡olak, TuÄŸba Seda	drop
950	786021145	Bullying victimization: time trends and the overlap between traditional and cyberbullying across countries in Europe and North America	2020	International Journal of Public Health	Cosma, Alina and Walsh, Sophie D. and Chester, Kayleigh L. and Callaghan, Mary and Molcho, Michal and Craig, Wendy and Pickett, William	drop
951	786021146	Smartphone Addiction and Its Relationship with Cyberbullying Among University Students	2019	International Journal of Mental Health and Addiction	Qudah, Mohammad Farhan Al and Albursan, Ismael Salamah and Bakhiet, Salaheldin Farah Attallah and Hassan, Elsayed Mohammed Abu Hashem and Alfnan, Ali A. and Aljomaa, Suliman S. and AL-khadher, Mohammed Mohammed Ateik	drop
952	786021147	Styles of Bystander Intervention in Cyberbullying Incidents	2020	International Journal of Bullying Prevention	Moxey, Natasha and Bussey, Kay	drop
953	786021148	Comparing Early Adolescentsâ€™ Positive Bystander Responses to Cyberbullying and Traditional Bullying: the Impact of Severity and Gender	2019	Journal of Technology in Behavioral Science	Macaulay, Peter J. R. and Boulton, Michael J. and Betts, Lucy R.	drop
954	786021149	The Influence of School Climate and Empathy on Cyberbystandersâ€™ Intention to Assist or Defend in Cyberbullying	2020	International Journal of Bullying Prevention	Schultze-Krumbholz, Anja and Zagorscak, Pavle and Hess, Markus and Scheithauer, Herbert	drop
955	786021150	Joint association of bullying and cyberbullying in health-related quality of life in a sample of adolescents	2020	Quality of Life Research	GonzÃ¡lez-Cabrera, JoaquÃ­n and Machimbarrena, Juan Manuel and Ortega-BarÃ³n, Jessica and Ãlvarez-BardÃ³n, Aitor	drop
956	786021151	Studentsâ€™ moral emotions and judgments of cyberbullying: The influence of previous cyberbullying experiences	2020	Current Psychology	Tong, Donia and Talwar, Victoria	drop
957	786021152	Parental Moral Disengagement Induction as a Predictor of Bullying and Cyberbullying: Mediation by Childrenâ€™s Moral Disengagement, Moral Emotions, and Validation of a Questionnaire	2020	Child Indicators Research	Zych, Izabela and GÃ³mez-Ortiz, Olga and FernÃ¡ndez Touceda, Lidia and Nasaescu, Elena and Llorent, Vicente J.	drop
958	786021153	Bystanders Against Cyberbullying: a Video Program for College Students	2020	International Journal of Bullying Prevention	Doane, Ashley N. and Ehlke, Sarah and Kelley, Michelle L.	retrieved
959	786021154	Examination of the Relationship between Cyberbullying and Cyber Victimization	2020	Journal of Child and Family Studies	Yildiz Durak, Hatice and Saritepeci, Mustafa	drop
960	786021155	Emotional adjustment in victims and perpetrators of cyberbullying and traditional bullying	2020	Social Psychology of Education	CaÃ±as, Elizabeth and EstÃ©vez, EstefanÃ­a and MartÃ­nez-Monteagudo, M. Carmen and Delgado, Beatriz	drop
961	786021156	Childhood Emotional Trauma and Cyberbullying Perpetration Among Emerging Adults: A Multiple Mediation Model of the Role of Problematic Social Media Use and Psychopathology	2020	International Journal of Mental Health and Addiction	Kircaburun, Kagan and Demetrovics, Zsolt and KirÃ¡ly, Orsolya and Griffiths, Mark D.	drop
962	786021157	Cyberbullying and Adolescents	2020	Current Pediatrics Reports	Kumar, Vidhya Lakshmi and Goldstein, Mark A.	drop
963	786021158	Correction to: Middle School Effects of the Dating MattersÂ® Comprehensive Teen Dating Violence Prevention Model on Physical Violence, Bullying, and Cyberbullying: A Cluster-Randomized Controlled Trial (Prevention Science, (2021), 22, 2, (151-161), 10.1007/s11121-019-01071-9)	2021	Prevention Science	Vivolo-Kantor, Alana M. and Niolon, Phyllis Holditch and Estefan, Lianne Fuino and Le, Vi Donna and Tracy, Allison J. and Latzman, Natasha E. and Little, Todd D. and Lang, Kyle M. and DeGue, Sarah and Tharp, Andra Teten	drop
964	786021159	Cyberbullying Perpetration and Victimization in Youth: A Meta-Analysis of Longitudinal Studies	2020	Journal of Computer-Mediated Communication	Marciano, Laura and Schulz, Peter J and Camerini, Anne-Linda	drop
965	786021160	Cyber Operations and Collective Countermeasures under International Law	2020	Journal of Conflict and Security Law	Haataja, Samuli	drop
966	786021161	SmiDCA: An Anti-Smishing Model with Machine Learning Approach	2018	The Computer Journal	Sonowal, Gunikhan and Kuppusamy, K S	drop
967	786021162	Digital danger: a review of the global public health, patient safety and cybersecurity threats posed by illicit online pharmacies	2016	British Medical Bulletin	Mackey, Tim K. and Nayyar, Gaurvika	drop
968	786021163	On the Relevance of Spatial and Temporal Dimensions in Assessing Computer Susceptibility to System Trespassing Incidents	2015	The British Journal of Criminology	Maimon, David and Wilson, Theodore and Ren, Wuling and Berenblum, Tamar	drop
969	786021164	Reference Ontology for Cybersecurity Operational Information	2015	The Computer Journal	Takahashi, Takeshi and Kadobayashi, Youki	drop
970	786021165	FHSD: An Improved IP Spoof Detection Method for Web DDoS Attacks	2015	The Computer Journal	Shiaeles, Stavros N. and Papadaki, Maria	drop
971	786021166	From Cyber-Bombs to Political Fallout: Threat Representations with an Impact in the Cyber-Security Discourse	2013	International Studies Review	Dunn Cavelty, Myriam	drop
972	786021167	Sponsoring trust in tomorrow's technology: towards a global digital infrastructure policy	2011	International Data Privacy Law	Miller, John and Hoffman, David	drop
973	786021168	Co-occurrence of Victimization from Five Subtypes of Bullying: Physical, Verbal, Social Exclusion, Spreading Rumors, and Cyber	2010	Journal of Pediatric Psychology	Wang, Jing and Iannotti, Ronald J. and Luk, Jeremy W. and Nansel, Tonja R.	drop
974	786021169	Digital Disaster, Cyber Security, and the Copenhagen School	2009	International Studies Quarterly	Hansen, Lene and Nissenbaum, Helen	drop
975	786021170	Real-World Dangers in an Online Reality: A Qualitative Study Examining Online Relationships and Cyber Abuse	2009	Social Work Research	Mishna, Faye and McLuckie, Alan and Saini, Michael	drop
976	786021171	Speed, International Security, and â€œNew Warâ€ Coverage in Cyberspace	2006	Journal of Computer-Mediated Communication	Walsh, Lucas and Barbara, Julien	drop
977	786021172	Brief Mindfullness Practice as an Intervention on the Relationship between Cyberbullying and Depressive Symptom among Young Adults in Malaysia	2019		Ng, Jun Quan; Choo, Bing Hee; Lee, Ziyi	retrieved
978	786021173	Examining the efficacy of the Olweus prevention programme in reducing bullying: the Malaysian experience	2009	Procedia Social and Behavioral Sciences	Yaakub, Noran Fauziah; Haron, Fatimah; and, Goh, Chee Leong	drop
					total eligible from database	74
					total abs screened database	976
					total not retrieved	903
