# Supplementary material for: A systematic review and meta-analysis of interventions to decrease cyberbullying perpetration and victimization: An in-depth analysis within the Asia Pacific region
Source: Front Psychiatry. 2023 Jan 27;14:1014258. doi: 10.3389/fpsyt.2023.1014258 (PMC9911532; doi:10.3389/fpsyt.2023.1014258)
Supplement: Supplementary file 7 [file Table_2.xlsx]

## Sheet: full_text
id	eligible	reason for non-eligible	country	type	search	title	year	journal	authors
786020195	y		China	Journal	Database Search	A pilot intervention study on bullying prevention among junior high school students in Shantou, China	2022	BMC Public Health	Peng, Zhekuan and Li, Liping and Su, Xuefen and Lu, Yaogui
786020214	y		South Korea	Journal	Database Search	Can Online Education Programs Solve the Cyberbullying Problem? Educating South Korean Elementary Students in the COVID-19 Era	2021	Sustainability	Choi, Eunsun and Park, Namje
786020255	n	Not measuring CB perpetration and victimization	Cyprus	Journal	Database Search	Improving Children's E-Safety Skills through an Interactive Learning Environment: A Quasi-Experimental Study	2020	Multimodal Technologies and Interaction	Nicolaidou, Iolie and Venizelou, Agnes
786020257	n	Not in Asia-Pacific countries	Greece	Journal	Database Search	Raising awareness on cyber safety: adolescents' experience of a primary healthcare professional-led, school-based, multi-center intervention	2019	International Journal of Adolescent Medicine and Health	Tsimtsiou, Zoi and Drosos, Evangelos and Drontsos, Anastasios and Anna-Bettina Haidich and Dantsi, Fotini and Sekeri, Zafiria and Dardavesis, Theodoros and Nanos, Panagiotis and Arvanitidou, Malamatenia
786020258	n	Not in Asia-Pacific countries	Spain	Journal	Database Search	Effects of an incremental theory of personality intervention on the reciprocity between bullying and cyberbullying victimization and perpetration in adolescents	2019	PLoS One	Calvete, Esther and Orue, Izaskun and FernÃ¡ndez-GonzÃ¡lez, Liria and Prieto-Fidalgo, Angel
786020286	n	Not in Asia-Pacific countries	Brazil	Journal	Database Search	Intervention in social skills and bullying	2018	Revista Brasileira de Enfermagem	da Silva, Jorge Luiz and de Oliveira, Wanderlei Abadio and Carlos, Diene Monique and Lizzi, Elisangela Aparecida da Silva and RosÃ¡rio, Rafaela and Silva, Marta AngÃ©lica Iossi
786020293	n	Not in Asia-Pacific countries	United States	Journal	Database Search	A Mixed Methods Evaluation of the "Aged-Up" STAC Bullying Bystander Intervention for High School Students	2018	The Professional Counselor	Johnston, April D and Midgett, Aida and Doumas, Diana M and Moody, Steve
786020299	y		Singapore	Journal	Database Search	iZ HERO adventure: Evaluating the effectiveness of a peer-mentoring and transmedia cyberwellness program for children	2017	Psychology of popular media culture.	Liau, Albert Kienfie and Park, Yuhyun and Gentile, Douglas A. and Katna, Dashalini P. and Tan, Celestine Hana A. and Khoo, Angeline
786020304	y		Australia	Journal	Database Search	Longitudinal impact of the Cyber Friendly Schools program on adolescents' cyberbullying behavior	2016	Aggressive Behavior	Cross, Donna and Shaw, ThÃ©rÃ¨se and Hadwen, Kate and Cardoso, Patricia and Slee, Phillip and Roberts, Clare and Thomas, Laura and Barnes, Amy
786020317	y		Taiwan	Journal	Database Search	Cyber Bullying Prevention: Intervention in Taiwan	2013	PLoS One	Ming-Shinn, Lee and Zi-Pei, Wu and SvanstrÃ¶m, Leif and Dalal, Koustuv
786020327	n	Not in Asia-Pacific countries	Belgium	Journal	Database Search	Thinking before posting? Reducing cyber harassment on social networking sites through a reflective message.	2017	Computers in Human Behavior	Van Royen, Kathleen and Poels, Karolien and Vandebosch, Heidi and Adam, Philippe
786020359	n	No outcome data	Malaysia	Journal	Database Search	Development of a Personalized Mobile Mental Health Intervention for Workplace Cyberbullying Among Health Practitioners: Protocol for a Mixed Methods Study.	2020	JMIR research protocols	Kim, Yun Jin and Qian, Linchao and Aslam, Muhammad Shahzad
786020365	n	Not in Asia-Pacific countries	Germany	Journal	Database Search	Does the Information about Classroom Norms Change the Individual Injunctive Norms about Cyberbullying? â€“ A Minimal Intervention Study.	2018	International Journal of Developmental Science	Pfetsch, Jan and Schultze-Krumbholz, Anja and FÃ¼llgraf, Franziska and Scheithauer, Herbert and Stavrinides, Panayiotis and Fanti, Kostas
786020367	n	Not in Asia-Pacific countries	Germany	Journal	Database Search	Early childhood parenting and adolescent bullying behavior: Evidence from a randomized intervention at ten-year follow-up.	2021	Social Science & Medicine	Kim, Jun Hyung and Hahlweg, Kurt and Schulz, Wolfgang
786020388	n	Review article	United States	Journal	Database Search	Instigators of Cyber-Bullying: A New Strategy for New Players.	2019	Journal of Creativity in Mental Health	Hicks, Janet and Clair, Brian Le and Waltz, Macy and Corvette, Michelle and Berry, Steve
786020404	n	Not in Asia-Pacific countries	India	Journal	Database Search	Reducing Cyber-bullying and Problem Behaviors among Students through Parental Group Therapy.	2016	Pakistan Journal of Psychological Research	Sandhu, Damanjit and Kaur, Shubhdip
786020405	n	Not in Asia-Pacific countries	United States	Journal	Database Search	Reducing cyberbullying: A theory of reasoned action-based video prevention program for college students.	2016	Aggressive Behavior	Doane, Ashley N. and Kelley, Michelle L. and Pearson, Matthew R.
786020411	n	Not in Asia-Pacific countries	Spain	Journal	Database Search	Safety.Net: A Pilot Study on a Multi-Risk Internet Prevention Program.	2021	International journal of environmental research and public health	Ortega-BarÃ³n, JÃ©ssica and GonzÃ¡lez-Cabrera, JoaquÃ­n and Machimbarrena, Juan M and Montiel, Irene
786020418	y		Hong Kong	Journal	Database Search	Testing the Effectiveness of an E-Course to Combat Cyberbullying.	2019	Cyberpsychology, behavior and social networking	Leung, Angel Nga Man and Wong, Natalie and Farver, JoAnn M
786020421	n	Not measuring CB perpetration and victimization	Australia	Journal	Database Search	The Cyberbullying Picture Series (CyPicS): Developed for Use in Cyberbullying and Cyberbystander Research.	2021	Psychological reports	McLoughlin, Larisa T and Broadhouse, Kathryn M and Clacy, Amanda and Winks, Natalie and Lagopoulos, Jim and Hermens, Daniel F
786020428	n	Review article	United States	Journal	Database Search	Using Solution-Focused Dramatic Empathy Training to Eliminate Cyber-Bullying.	2016	Journal of Creativity in Mental Health	Froeschle Hicks, Janet and Le Clair, Brian and Berry, Stephan
786020484	n	Not measuring CB perpetration and victimization	Malaysia	Journal	Database Search	The Use of Multimedia in Increasing Perceived Knowledge and Awareness of Cyber-bullying among Adolescents: A Pilot Study	2015	International Educational Technology Conference, IETC 2014, 3-5 September 2014, Chicago, IL, USA	Wahab, Nadia Abdul and Yahaya, Wan Ahmad Jaafar Wan and Muniandy, Balakrishnan
786020493	n	Not in Asia-Pacific countries	Belgium	Journal	Database Search	The efficacy of the Friendly Attac serious digital game to promote prosocial bystander behavior in cyberbullying among young adolescents: A cluster-randomized controlled trial	2018	Computers in Human Behavior	DeSmet, A. and Bastiaensens, S. and Van Cleemput, K. and Poels, K. and Vandebosch, H. and Deboutte, G. and Herrewijn, L. and Malliet, S. and Pabian, S. and Van Broeckhoven, F. and De Troyer, O. and Deglorie, G. and Van Hoecke, S. and Samyn, K. and De Bourdeaudhuij, I.
786020532	n	Review article	Australia	Book Chapter	Database Search	Online social marketing approaches to inform cyber/bullying prevention and intervention: What have we learnt?	2018	Reducing Cyberbullying in Schools: International Evidence-Based Best Practices	Spears, Barbara A. and Taddeo, Carmel and Barnes, Alan and Campbell, Marilyn and Bauman, Sheri
786020574	y		Thailand	Journal	Database Search	Effects of a formative assessment-based contextual gaming approach on studentsâ€™ digital citizenship behaviours, learning motivations, and perceptions	2020	Computers & Education	Tapingkae, Preeyada and Panjaburee, Patcharin and Hwang, Gwo-Jen and Srisawasdi, Niwat
786020590	n	Not in Asia-Pacific countries	Hungary	Journal	Database Search	Gender-specific pathways regarding the outcomes of a cyberbullying youth education program	2022	Personality and Individual Differences	KapitÃ¡ny-FÃ¶vÃ©ny, MÃ¡tÃ© and LukÃ¡cs, J. Ãgnes and TakÃ¡cs, Johanna and Kitzinger, IstvÃ¡n and SoÃ³snÃ© Kiss, Zsuzsanna and SzabÃ³, GÃ¡bor and Falus, AndrÃ¡s and Feith, Helga Judit
786020644	n	Not in Asia-Pacific countries	Netherland	Journal	Database Search	Empowering digital citizenship: An anti-cyberbullying intervention to increase children's intentions to intervene on behalf of the victim	2020	Computers in Human Behavior	Vlaanderen, Anne and Bevelander, Kirsten E. and Kleemans, Mariska
786020657	n	Not in Asia-Pacific countries	United States	Journal	Database Search	Feasibility of a Web-Accessible Game-Based Intervention Aimed at Improving Help Seeking and Coping Among Sexual and Gender Minority Youth: Results From a Randomized Controlled Trial	2021	Journal of Adolescent Health	Egan, J.E. and Corey, S.L. and Henderson, E.R. and Abebe, K.Z. and Louth-Marquez, W. and Espelage, D. and Hunter, S.C. and DeLucas, M. and Miller, E. and Morrill, B.A. and Hieftje, K. and Sang, J.M. and Friedman, M.S. and Coulter, R.W.S.
786020661	n	Not in Asia-Pacific countries	Israel	Journal	Database Search	The Effectiveness of Safe Surfing Intervention Program in Reducing WhatsApp Cyberbullying and Improving Classroom Climate and Student Sense of Class Belonging in Elementary School	2021	Journal of Early Adolescence	Aizenkot, D. and Kashy-Rosenbaum, G.
786020665	n	No outcome data	South Korea	Journal	Database Search	Development of a Violence Prevention Educational Program for Elementary School Children Using Empathy (VPEP-E)	2020	Child Health Nursing Research	Kang, S.R. and Kim, S.-J. and Lee, J.
786020666	y		Australia	Journal	Database Search	A Pilot Study of an Online Psychoeducational Program on Cyberbullying That Aims to Increase Confidence and Help-Seeking Behaviors among Adolescents	2020	Cyberpsychology, Behavior, and Social Networking	Chillemi, K. and Abbott, J.-A.M. and Austin, D.W. and Knowles, A.
786020669	y		Indonesia	Journal	Database Search	Effectiveness of solution-focused brief counseling to reduce online aggression of student	2020	Universal Journal of Educational Research	Wiretna, C.D. and Saputra, W.N.E. and Muarifah, A. and Barida, M.
786020670	n	No outcome data	Australia	Journal	Database Search	The friendly schools initiative: Evidence-based bullying prevention in Australian schools	2019	Making an Impact on School Bullying: Interventions and Recommendations	Barnes, A. and Pearce, N. and Erceg, E. and Runions, K. and Cardoso, P. and Lester, L. and Coffin, J. and Cross, D.
786020671	y		Australia	Journal	Database Search	Impact of the Friendly Schools whole-school intervention on transition to secondary school and adolescent bullying behaviour	2018	European Journal of Education	Cross, D. and Shaw, T. and Epstein, M. and Pearce, N. and Barnes, A. and Burns, S. and Waters, S. and Lester, L. and Runions, K.
786020675	y		Australia	Book Chapter	Database Search	Cyber-Friendly Schools. Final report to Healthway.	2018	Reducing Cyberbullying in Schools: International Evidence-Based Best Practices	Cross, D. and Barnes, A. and Cardoso, P. and Hadwen, K. and Shaw, T. and Campbell, M. and Slee, P.T.
786020676	n	Not in Asia-Pacific countries	Netherland	Book Chapter	Database Search	Stop Online Bullies: The advantages and disadvantages of a standalone intervention	2018	Reducing Cyberbullying in Schools: International Evidence-Based Best Practices	Dehue, F. and VÃ¶llink, T. and Gunther, N. and Jacobs, N.
786020677	n	Not in Asia-Pacific countries	Spain	Journal	Database Search	Impact of cyberprogram 2.0 on different types of school violence and aggressiveness	2016	Frontiers in Psychology	Garaigordobil, M. and MartÃ­nez-Valderrey, V.
786020680	n	Not in Asia-Pacific countries	Spain	Journal	Database Search	Knowing, building and living together on internet and social networks: The ConRed cyberbullying prevention program	2012	International Journal of Conflict and Violence	Ortega-Ruiz, R. and Del Rey, R. and Casas, J.A.
786020681	n	Not in Asia-Pacific countries	Italy	Journal	Database Search	Online and offline peer led models against bullying and cyberbullying	2012	Psicothema	Palladino, B.E. and Nocentini, A. and Menesini, E.
786020738	n	Not empirical study with comparative design	Taiwan	Journal	Database Search	"Think before You Type": The Effectiveness of Implementing an Anti-Cyberbullying Project in an EFL Classroom	2018	Pedagogies: An International Journal	Chen, Cheryl Wei-yu
786020761	y		Australia	Journal	Database Search	If It's about Me, Why Do It without Me? Genuine Student Engagement in School Cyberbullying Education	2015	International Journal of Emotional Education	Cross, Donna and Lester, Leanne and Barnes, Amy and Cardoso, Patricia and Hadwen, Kate
786020801	n	Not measuring CB perpetration and victimization	Indonesia	Journal	Database Search	The development and pilot testing of an adolescent bullying intervention in Indonesiaâ€“the ROOTS Indonesia program	2019	Global Health Action	Bowes, Lucy and Aryani, Farida and Ohan, Faridah and Haryanti, Rina Herlina and Winarna, Sri and Arsianto, Yuli and Budiyawati, Hening and Widowati, Evi and Saraswati, Rika and Kristianto, Yuliana and Suryani, Yulinda Erma and Ulum, Derry Fahrizal and Minnick, Emilie
786020815	n	Not measuring CB perpetration and victimization	Thailand	Journal	Database Search	Social Intelligence Counseling Intervention to Reduce Bullying Behaviors Among Thai Lower Secondary School Students: A Mixed-method Study.	2021	Journal of preventive medicine and public health = Yebang Uihakhoe chi	Jueajinda, Samith and Stiramon, Orapin and Ekpanyaskul, Chatchai
786020816	n	Not measuring CB perpetration and victimization	South Korea	Journal	Database Search	Effects of a smartphone application for cognitive rehearsal intervention on workplace bullying and turnover intention among nurses	2019	International Journal of Nursing Practice	Kang, Jiyeon and Jeong, Yeon Jin
786020817	n	Not measuring CB perpetration and victimization	Australia	Journal	Database Search	A Novel Approach to Tackling Bullying in Schools: Personality-Targeted Intervention for Adolescent Victims and Bullies in Australia	2020	Journal of the American Academy of Child and Adolescent Psychiatry	Kelly, Erin V. and Newton, Nicola C. and Stapinski, Lexine A. and Conrod, Patricia J. and Barrett, Emma L. and Champion, Katrina E. and Teesson, Maree
786020825	n	Not measuring CB perpetration and victimization	Australia	Journal	Database Search	Developing wellbeing through a randomised controlled trial of a martial arts based intervention: An alternative to the anti-bullying approach	2019	International Journal of Environmental Research and Public Health	Moore, Brian and Woodcock, Stuart and Dudley, Dean
786020826	n	Not measuring CB perpetration and victimization	Taiwan	Journal	Database Search	Effects of a Collaborative Board Game on Bullying Intervention: A Group-Randomized Controlled Trial	2018	Journal of School Health	Nieh, Hsi Ping and Wu, Wen Chi
786020830	n	Not CB intervention	Australia	Journal	Database Search	How teachers deal with cases of bullying at school: What victims say	2020	International Journal of Environmental Research and Public Health	Rigby, Ken
786020854	n	Not measuring CB perpetration and victimization	Australia	Journal	Database Search	Coping in the Cyberworld: Program Implementation and Evaluation “A Pilot Project	2009	Australian Journal of Guidance and Counselling	Lam, Cecilia Wing Chi and Frydenberg, Erica
786020865	n	Not empirical study with comparative design	Australia	Journal	Database Search	Cyberbullying prevention: One primary schools approach	2010	Australian Journal of Guidance and Counselling	Tangen, Donna and Campbell, Marilyn
786020866	n	Not empirical study with comparative design	Australia	Journal	Database Search	A cyberbullying intervention with primary-aged students	2012	Australian Journal of Guidance and Counselling	Toshack, Troy and Colmar, Susan
786020877	n	Not in Asia-Pacific countries	United States	Journal	Database Search	Assessing the effects of the dating violence prevention program "safe dates" using random coefficient regression modeling	2005	Prevention Science	Foshee, Vangie A. and Bauman, Karl E. and Ennett, Susan T. and Suchindran, Chirayath and Benefield, Thad and Linder, G. Fletcher
786020880	n	Not in Asia-Pacific countries	United States	Journal	Database Search	Efficacy of a randomized trial of a community and school-based anti-violence media intervention among small-town middle school youth	2008	Prevention Science	Swaim, Randall C. and Kelly, Kathleen
786020897	n	Not in Asia-Pacific countries	United States	Journal	Database Search	Engagement Matters: Lessons from Assessing Classroom Implementation of Steps to Respect: A Bullying Prevention Program Over a One-year Period	2014	Prevention Science	Low, Sabina and Van Ryzin, Mark J. and Brown, Eric C. and Smith, Brian H. and Haggerty, Kevin P.
786020908	n	Not in Asia-Pacific countries	United States	Journal	Database Search	The Effects of Moms and Teens for Safe Dates: A Dating Abuse Prevention Program for Adolescents Exposed to Domestic Violence	2015	Journal of Youth and Adolescence	Foshee, Vangie A. and Benefield, Thad and Dixon, Kimberly S. and Chang, Ling Yin and Senkomago, Virginia and Ennett, Susan T. and Moracco, Kathryn E. and Bowling, J. Michael
786020924	n	Not in Asia-Pacific countries	United States	Journal	Database Search	Preventing Adolescent Social Anxiety and Depression and Reducing Peer Victimization: Intervention Development and Open Trial	2016	Child and Youth Care Forum	La Greca, Annette M. and Ehrenreich-May, Jill and Mufson, Laura and Chan, Sherilynn
786020934	n	Not measuring CB perpetration and victimization	Australia	Journal	Database Search	Family Involvement in a Whole-School Bullying Intervention: Mothers' and Fathers' Communication and Influence with Children	2017	Journal of Child and Family Studies	Lester, Leanne and Pearce, Natasha and Waters, Stacey and Barnes, Amy and Beatty, Shelley and Cross, Donna
786020941	n	Not in Asia-Pacific countries	United States	Journal	Database Search	Project Date SMART: a Dating Violence (DV) and Sexual Risk Prevention Program for Adolescent Girls with Prior DV Exposure	2018	Prevention Science	Rizzo, Christie J. and Joppa, Meredith and Barker, David and Collibee, Charlene and Zlotnick, Caron and Brown, Larry K.
786020942	n	Not in Asia-Pacific countries	Netherland	Journal	Database Search	Prevention of violent revictimization in depressed patients with an add-on internet-based emotion regulation training (iERT): Study protocol for a multicenter randomized controlled trial	2018	BMC Psychiatry	Christ, Carolien and de Waal, Marleen M. and van Schaik, Digna J.F. and Kikkert, Martijn J. and Blankers, Matthijs and Bockting, Claudi L.H. and Beekman, Aartjan T.F. and Dekker, Jack J.M.
786020947	n	Not in Asia-Pacific countries	Netherland	Journal	Database Search	BEATVIC, a body-oriented resilience therapy using kickboxing exercises for people with a psychotic disorder: A feasibility study	2018	BMC Psychiatry	De Vries, Bertine and Van Der Stouwe, Elisabeth C.D. and Waarheid, Clement O. and Poel, Stefan H.J. and Van Der Helm, Erwin M. and Aleman, AndrÃ© and Arends, Johan and Pijnenborg, Gerdina H.M. and Van Busschbach, Jooske T.
786020950	n	Not in Asia-Pacific countries	United States	Journal	Database Search	Bystander Program Effectiveness to Reduce Violence Acceptance: RCT in High Schools	2019	Journal of Family Violence	Coker, Ann L. and Bush, Heather M. and Brancato, Candace J. and Clear, Emily R. and Recktenwald, Eileen A.
786020951	n	Not in Asia-Pacific countries	United States	Journal	Database Search	Coaching Teachers to Detect, Prevent, and Respond to Bullying Using Mixed Reality Simulation: an Efficacy Study in Middle Schools	2019	International Journal of Bullying Prevention	Pas, Elise T. and Waasdorp, Tracy E. and Bradshaw, Catherine P.
786020952	n	Not in Asia-Pacific countries	United States	Journal	Database Search	Evaluation of a Bystander-Focused Interpersonal Violence Prevention Program with High School Students	2019	Prevention Science	Edwards, Katie M. and Banyard, Victoria L. and Sessarego, Stephanie N. and Waterman, Emily A. and Mitchell, Kimberly J. and Chang, Hong
786020953	n	Not in Asia-Pacific countries	United States	Journal	Database Search	Evaluation of a Whole-School Change Intervention: Findings from a Two-Year Cluster-Randomized Trial of the Restorative Practices Intervention	2019	Journal of Youth and Adolescence	Acosta, Joie and Chinman, Matthew and Ebener, Patricia and Malone, Patrick S. and Phillips, Andrea and Wilks, Asa
786020971	n	Not in Asia-Pacific countries	United States	Journal	Database Search	The Effects of Practitioner-Delivered School-Based Mental Health on Aggression and Violence Victimization in Middle Schoolers	2020	School Mental Health	Morgan-Lopez, Antonio A. and Saavedra, Lissette M. and Yaros, Anna C. and Trudeau, James V. and Buben, Alex
786020975	n	Not in Asia-Pacific countries	United States	Journal	Database Search	Creating Supportive Contexts for Early Adolescents during the First Year of Middle School: Impact of a Developmentally Responsive Multi-Component Intervention	2020	Journal of Youth and Adolescence	Dawes, Molly and Farmer, Thomas and Hamm, Jill and Lee, David and Norwalk, Kate and Sterrett, Brittany and Lambert, Kerrylin
786020987	n	Not in Asia-Pacific countries	Netherland	Journal	Database Search	Neural changes following a body-oriented resilience therapy with elements of kickboxing for individuals with a psychotic disorder: a randomized controlled trial	2021	European Archives of Psychiatry and Clinical Neuroscience	van der Stouwe, Elisabeth C.D. and Pijnenborg, Gerdina H.M. and Opmeer, Esther M. and de Vries, Bertine and Marsman, Jan Bernard C. and Aleman, AndrÃ© and van Busschbach, Jooske T.
786020999	n	Not in Asia-Pacific countries	United States	Journal	Database Search	The Preventing Relational Aggression in Schools Everyday (PRAISE) Program: Adaptations to Overcome Subgroup Differences in Program Benefits	2022	Prevention Science	Waasdorp, Tracy Evian and Paskewich, Brooke S. and Waanders, Christine and Fu, Rui and Leff, Stephen S.
786021014	n	Not in Asia-Pacific countries	United States	Journal	Database Search	Impact of the RIPP Violence Prevention Program on Rural Middle School Students	2003	Journal of Primary Prevention	Farrell, Albert D. and Valois, Robert F. and Meyer, Aleta L. and Tidwell, Ritchie P.
786021050	n	Not in Asia-Pacific countries	United States	Journal	Database Search	The Bullying Literature Project: Using Children's Literature to Promote Prosocial Behavior and Social-Emotional Outcomes Among Elementary School Students	2015	Contemporary School Psychology	Wang, Cixin and Couch, Lauren and Rodriguez, Geovanna Rosas and Lee, Catherine
786021113	n	Not in Asia-Pacific countries	Germany	Journal	Database Search	Prevention 2.0: Targeting Cyberbullying @ School	2014	Prevention Science	Wölfer, Ralf and Schultze-Krumbholz, Anja and Zagorscak, Pavle and Jäkel, Anne and Göbel, Kristin and Scheithauer, Herbert
786021142	y		Hong Kong	Journal	Database Search	A Cyberbullying Intervention for Hong Kong Chinese College Students	2018	Applied Research in Quality of Life	Leung, Angel Nga Man and Fung, Daniel Chi Lok and Farver, Jo Ann M.
786021153	n	Not in Asia-Pacific countries	United States	Journal	Database Search	Bystanders Against Cyberbullying: a Video Program for College Students	2020	International Journal of Bullying Prevention	Doane, Ashley N. and Ehlke, Sarah and Kelley, Michelle L.
786021172	y		Malaysia	Thesis	Other Source	Brief Mindfulness Practice as an Intervention on the Relationship between Cyberbullying and Depressive Symptom among Young Adults in Malaysia	2019		Ng, Jun Quan; Choo, Bing Hee; Lee, Ziyi
786021173	n	No outcome data	Malaysia	Journal	Other Source	Examining the efficacy of the Olweus prevention programme in reducing bullying: the Malaysian experience	2009	Procedia Social and Behavioral Sciences	Yaakub, Noran Fauziah; Haron, Fatimah; and, Goh, Chee Leong
